# Supplementary material for: Exploring health in the UK Biobank: associations with sociodemographic characteristics, psychosocial factors, lifestyle and environmental exposures
Source: PubMed Central journal article supplement (PMC8504077; doi:10.1186/s12916-021-02097-z), 2021-10-11
Supplement: 12916_2021_2097_MOESM1_ESM.pdf [file 12916_2021_2097_MOESM1_ESM.pdf]

## Supplementary material

---

The following material accompanies the article

**Exploring health in the UK Biobank: associations with sociodemographic characteristics, psychosocial factors, lifestyle and environmental exposures**

by Julian Mutz, Charlotte J Roscoe and Cathryn M Lewis

published in BMC Medicine

## Table of contents

|                                                                                                 |           |
|-------------------------------------------------------------------------------------------------|-----------|
| <b>TABLE S1. DATA FIELDS .....</b>                                                              | <b>4</b>  |
| <b>FIGURE S1. STUDY FLOWCHART .....</b>                                                         | <b>5</b>  |
| <b>TABLE S2. BASELINE CHARACTERISTICS .....</b>                                                 | <b>6</b>  |
| <b>FIGURES S2-S3. SELF-REPORTED ILLNESSES .....</b>                                             | <b>9</b>  |
| CANCER ILLNESSES .....                                                                          | 9         |
| NON-CANCER ILLNESSES .....                                                                      | 10        |
| <b>FIGURE S4. CORRELATION MATRIX CONTINUOUS VARIABLES .....</b>                                 | <b>11</b> |
| <b>TABLES S3-S5. DESCRIPTIVE STATISTICS STRATIFIED BY HEALTH INDICATORS .....</b>               | <b>12</b> |
| STRATIFIED BY HEALTH STATUS .....                                                               | 12        |
| STRATIFIED BY LONG-STANDING ILLNESS .....                                                       | 14        |
| BASELINE CHARACTERISTICS STRATIFIED BY SELF-RATED HEALTH .....                                  | 16        |
| <b>TABLES S6-S9. VISUAL SUMMARY OF FINDINGS .....</b>                                           | <b>18</b> |
| LIFESTYLE FACTORS .....                                                                         | 18        |
| ENVIRONMENTAL EXPOSURES .....                                                                   | 19        |
| PSYCHOSOCIAL FACTORS .....                                                                      | 20        |
| SOCIODEMOGRAPHIC CHARACTERISTICS .....                                                          | 21        |
| <b>TABLES S10-S13. REGRESSION TABLES LONG-STANDING ILLNESS .....</b>                            | <b>22</b> |
| SOCIODEMOGRAPHIC CHARACTERISTICS .....                                                          | 22        |
| PSYCHOSOCIAL FACTORS .....                                                                      | 23        |
| LIFESTYLE FACTORS .....                                                                         | 24        |
| ENVIRONMENTAL EXPOSURES .....                                                                   | 25        |
| <b>TABLES S14-S17. REGRESSION TABLES SELF-RATED HEALTH .....</b>                                | <b>26</b> |
| SOCIODEMOGRAPHIC CHARACTERISTICS .....                                                          | 26        |
| PSYCHOSOCIAL FACTORS .....                                                                      | 27        |
| LIFESTYLE FACTORS .....                                                                         | 28        |
| ENVIRONMENTAL EXPOSURES .....                                                                   | 29        |
| <b>TABLES S18-S21. REGRESSION TABLES HEALTH INDICATORS .....</b>                                | <b>30</b> |
| SOCIODEMOGRAPHIC CHARACTERISTICS .....                                                          | 30        |
| PSYCHOSOCIAL FACTORS .....                                                                      | 31        |
| LIFESTYLE FACTORS .....                                                                         | 32        |
| ENVIRONMENTAL EXPOSURES .....                                                                   | 33        |
| <b>TABLES S22-S24. STANDARDISED REGRESSION COEFFICIENTS TABLES .....</b>                        | <b>34</b> |
| HEALTH STATUS .....                                                                             | 34        |
| LONG-STANDING ILLNESS .....                                                                     | 35        |
| SELF-RATED HEALTH .....                                                                         | 36        |
| <b>FIGURES S5-S6. STANDARDISED REGRESSION COEFFICIENTS PLOTS .....</b>                          | <b>37</b> |
| LONG-STANDING ILLNESS .....                                                                     | 37        |
| SELF-RATED HEALTH .....                                                                         | 38        |
| <b>TABLE S25. BASELINE CHARACTERISTICS STRATIFIED BY SEX .....</b>                              | <b>39</b> |
| <b>TABLE S26. BASELINE CHARACTERISTICS STRATIFIED BY AGE .....</b>                              | <b>41</b> |
| <b>TABLE S27-S30. REGRESSION TABLES HEALTH STATUS STRATIFIED BY SEX .....</b>                   | <b>43</b> |
| SOCIODEMOGRAPHIC CHARACTERISTICS .....                                                          | 43        |
| PSYCHOSOCIAL FACTORS .....                                                                      | 44        |
| LIFESTYLE FACTORS .....                                                                         | 45        |
| ENVIRONMENTAL EXPOSURES .....                                                                   | 46        |
| <b>FIGURES S7-S9. CONFIDENCE INTERVAL PLOTS HEALTH STATUS STRATIFIED BY SEX .....</b>           | <b>47</b> |
| SOCIODEMOGRAPHIC AND PSYCHOSOCIAL FACTORS .....                                                 | 47        |
| LIFESTYLE FACTORS .....                                                                         | 48        |
| ENVIRONMENTAL EXPOSURES .....                                                                   | 49        |
| <b>TABLES S31-S34. REGRESSION TABLES HEALTH STATUS STRATIFIED BY AGE .....</b>                  | <b>50</b> |
| SOCIODEMOGRAPHIC CHARACTERISTICS .....                                                          | 50        |
| PSYCHOSOCIAL FACTORS .....                                                                      | 51        |
| LIFESTYLE FACTORS .....                                                                         | 52        |
| ENVIRONMENTAL EXPOSURES .....                                                                   | 53        |
| <b>FIGURES S10-S12. CONFIDENCE INTERVAL PLOTS HEALTH STATUS STRATIFIED BY AGE .....</b>         | <b>54</b> |
| SOCIODEMOGRAPHIC AND PSYCHOSOCIAL FACTORS .....                                                 | 54        |
| LIFESTYLE FACTORS .....                                                                         | 55        |
| ENVIRONMENTAL EXPOSURES .....                                                                   | 56        |
| <b>TABLES S35-S38. REGRESSION TABLES LONG-STANDING ILLNESS STRATIFIED BY SEX .....</b>          | <b>57</b> |
| SOCIODEMOGRAPHIC CHARACTERISTICS .....                                                          | 57        |
| PSYCHOSOCIAL FACTORS .....                                                                      | 58        |
| LIFESTYLE FACTORS .....                                                                         | 59        |
| ENVIRONMENTAL EXPOSURES .....                                                                   | 60        |
| <b>FIGURES S13-S15. CONFIDENCE INTERVAL PLOTS LONG-STANDING ILLNESS STRATIFIED BY SEX .....</b> | <b>61</b> |
| SOCIODEMOGRAPHIC AND PSYCHOSOCIAL FACTORS .....                                                 | 61        |
| LIFESTYLE FACTORS .....                                                                         | 62        |
| ENVIRONMENTAL EXPOSURES .....                                                                   | 63        |
| <b>TABLES S39-S42. REGRESSION TABLES LONG-STANDING ILLNESS STRATIFIED BY AGE .....</b>          | <b>64</b> |
| SOCIODEMOGRAPHIC CHARACTERISTICS .....                                                          | 64        |
| PSYCHOSOCIAL FACTORS .....                                                                      | 65        |
| LIFESTYLE FACTORS .....                                                                         | 66        |
| ENVIRONMENTAL EXPOSURES .....                                                                   | 67        |
| <b>FIGURES S16-S18. CONFIDENCE INTERVAL PLOTS LONG-STANDING ILLNESS STRATIFIED BY AGE .....</b> | <b>68</b> |

|                                                                                             |           |
|---------------------------------------------------------------------------------------------|-----------|
| SOCIODEMOGRAPHIC AND PSYCHOSOCIAL FACTORS .....                                             | 68        |
| LIFESTYLE FACTORS .....                                                                     | 69        |
| ENVIRONMENTAL EXPOSURES .....                                                               | 70        |
| <b>TABLES S43-S46. REGRESSION TABLES SELF-RATED HEALTH STRATIFIED BY SEX .....</b>          | <b>71</b> |
| SOCIODEMOGRAPHIC CHARACTERISTICS.....                                                       | 71        |
| PSYCHOSOCIAL FACTORS.....                                                                   | 72        |
| LIFESTYLE FACTORS .....                                                                     | 73        |
| ENVIRONMENTAL EXPOSURES .....                                                               | 74        |
| <b>FIGURES S19-S21. CONFIDENCE INTERVAL PLOTS SELF-RATED HEALTH STRATIFIED BY SEX .....</b> | <b>75</b> |
| SOCIODEMOGRAPHIC AND PSYCHOSOCIAL FACTORS .....                                             | 75        |
| LIFESTYLE FACTORS .....                                                                     | 76        |
| ENVIRONMENTAL EXPOSURES .....                                                               | 77        |
| <b>TABLES S47-S50. REGRESSION TABLES SELF-RATED HEALTH STRATIFIED BY AGE .....</b>          | <b>78</b> |
| SOCIODEMOGRAPHIC CHARACTERISTICS.....                                                       | 78        |
| PSYCHOSOCIAL FACTORS.....                                                                   | 79        |
| LIFESTYLE FACTORS .....                                                                     | 80        |
| ENVIRONMENTAL EXPOSURES .....                                                               | 81        |
| <b>FIGURES S22-S24. CONFIDENCE INTERVAL PLOTS SELF-RATED HEALTH STRATIFIED BY AGE .....</b> | <b>82</b> |
| SOCIODEMOGRAPHIC AND PSYCHOSOCIAL FACTORS .....                                             | 82        |
| LIFESTYLE FACTORS .....                                                                     | 83        |
| ENVIRONMENTAL EXPOSURES .....                                                               | 84        |
| <b>TABLE S51. BASELINE CHARACTERISTICS LONGITUDINAL SAMPLES .....</b>                       | <b>85</b> |
| <b>TABLES S52-S55. REGRESSION TABLES SELF-RATED HEALTH T1 .....</b>                         | <b>87</b> |
| SOCIODEMOGRAPHIC CHARACTERISTICS.....                                                       | 87        |
| PSYCHOSOCIAL FACTORS.....                                                                   | 88        |
| LIFESTYLE FACTORS .....                                                                     | 89        |
| ENVIRONMENTAL EXPOSURES .....                                                               | 90        |
| <b>TABLES S56-S59. REGRESSION TABLES SELF-RATED HEALTH T2 .....</b>                         | <b>91</b> |
| SOCIODEMOGRAPHIC CHARACTERISTICS.....                                                       | 91        |
| PSYCHOSOCIAL FACTORS.....                                                                   | 92        |
| LIFESTYLE FACTORS .....                                                                     | 93        |
| ENVIRONMENTAL EXPOSURES .....                                                               | 94        |
| <b>TABLE S60. DESCRIPTIVE STATISTICS ADDITIONAL ANALYSES .....</b>                          | <b>95</b> |
| DESCRIPTIVE STATISTICS .....                                                                | 95        |
| <b>FIGURE S25. GENERALISED ADDITIVE MODELS.....</b>                                         | <b>96</b> |

**Table S1. Data fields**

| <b>Table S1. Data fields used in the present study.</b> |                                                                   |
|---------------------------------------------------------|-------------------------------------------------------------------|
| <b>UK Biobank data field</b>                            | <b>Variable name</b>                                              |
| <b>Sociodemographic characteristics</b>                 |                                                                   |
| 31                                                      | Sex                                                               |
| 738                                                     | Average total household income before tax                         |
| 6138 <sup>1</sup>                                       | Qualifications                                                    |
| 21000 <sup>1</sup>                                      | Ethnic background                                                 |
| 21003                                                   | Age when attended assessment centre                               |
| 22001                                                   | Genetic sex                                                       |
| 26410                                                   | Index of Multiple Deprivation (England)                           |
| <b>Psychosocial factors</b>                             |                                                                   |
| 709 <sup>2</sup>                                        | Number in household                                               |
| 1031 <sup>2</sup>                                       | Frequency of friend/family visits                                 |
| 6160 <sup>2</sup>                                       | Leisure/social activities                                         |
| 2020 <sup>3</sup>                                       | Loneliness, isolation                                             |
| 2110 <sup>3</sup>                                       | Able to confide                                                   |
| <b>Lifestyle factors</b>                                |                                                                   |
| 864                                                     | Number of days per week walked 10+ minutes                        |
| 884                                                     | Number of days per week of moderate physical activity 10+ minutes |
| 904                                                     | Number of days per week of vigorous physical activity 10+ minutes |
| 943                                                     | Frequency of stair climbing in last 4 weeks                       |
| 1160                                                    | Sleep duration                                                    |
| 1239                                                    | Current tobacco smoking                                           |
| 1558                                                    | Alcohol intake frequency                                          |
| 3731                                                    | Former alcohol drinker                                            |
| 3859                                                    | Reason former drinker stopped drinking alcohol                    |
| 20116                                                   | Smoking status                                                    |
| 22037                                                   | MET minutes per week for walking                                  |
| 22038                                                   | MET minutes per week for moderate activity                        |
| 22039                                                   | MET minutes per week for vigorous activity                        |
| 23099                                                   | Body fat percentage                                               |
| 23104                                                   | Body mass index (BMI)                                             |
| <b>Environmental exposures</b>                          |                                                                   |
| 24003                                                   | Nitrogen dioxide air pollution; 2010                              |
| 24005                                                   | Particulate matter air pollution (pm10); 2010                     |
| 24006                                                   | Particulate matter air pollution (pm2.5); 2010                    |
| 24024                                                   | Average 24-hour sound level of noise pollution                    |
| 24500                                                   | Greenspace percentage, buffer 1000m                               |
| 24503                                                   | Greenspace percentage, buffer 300m                                |
| <b>Health indicators</b>                                |                                                                   |
| 2178                                                    | Overall health rating                                             |
| 2188                                                    | Long-standing illness, disability of infirmity                    |
| 20001 <sup>4</sup>                                      | Cancer code, self-reported                                        |
| 20002 <sup>4</sup>                                      | Non-cancer illness code, self-reported                            |
| <b>Other</b>                                            |                                                                   |
| 53                                                      | Date of attending assessment centre                               |
| 699                                                     | Length of time at current address                                 |
| 3140                                                    | Pregnant                                                          |

Note: <sup>1</sup> these variables have been further processed and categories used in the present study are described in the main body of the text. <sup>2</sup> variables used to derive social isolation index. <sup>3</sup> variables used to derive loneliness index. <sup>4</sup> variables used to derive health status.

**Loneliness index:**

1. If the response to one question was missing, “don’t know” or “prefer not to answer” and the response to the second question was scored 0, individuals were classified as not lonely.
2. If the response to one question was missing, “don’t know” or “prefer not to answer” and the response to the second question was scored 1, individuals were classified as missing data on loneliness.
3. If responses to both questions were missing, “don’t know” or “prefer not to answer”, individuals were classified as missing data on loneliness.

**Social isolation index:**

1. If the response to two questions were scored 1 and the response to the third question was missing, “don’t know” or “prefer not to answer”, individuals were classified as socially isolated.
2. If two or more responses to questions were missing, “don’t know” or “prefer not to answer”, individuals were classified as missing data on social isolation.
3. If the response to two questions were scored 0 and the response to the third question was missing, “don’t know” or “prefer not to answer”, individuals were classified as not socially isolated.
4. If the response to one question was scored 0, the response to one question was scored 1 and the response to the third question was missing, “don’t know” or “prefer not to answer”, individuals were classified as missing data on social isolation.

**Figure S1. Study flowchart**

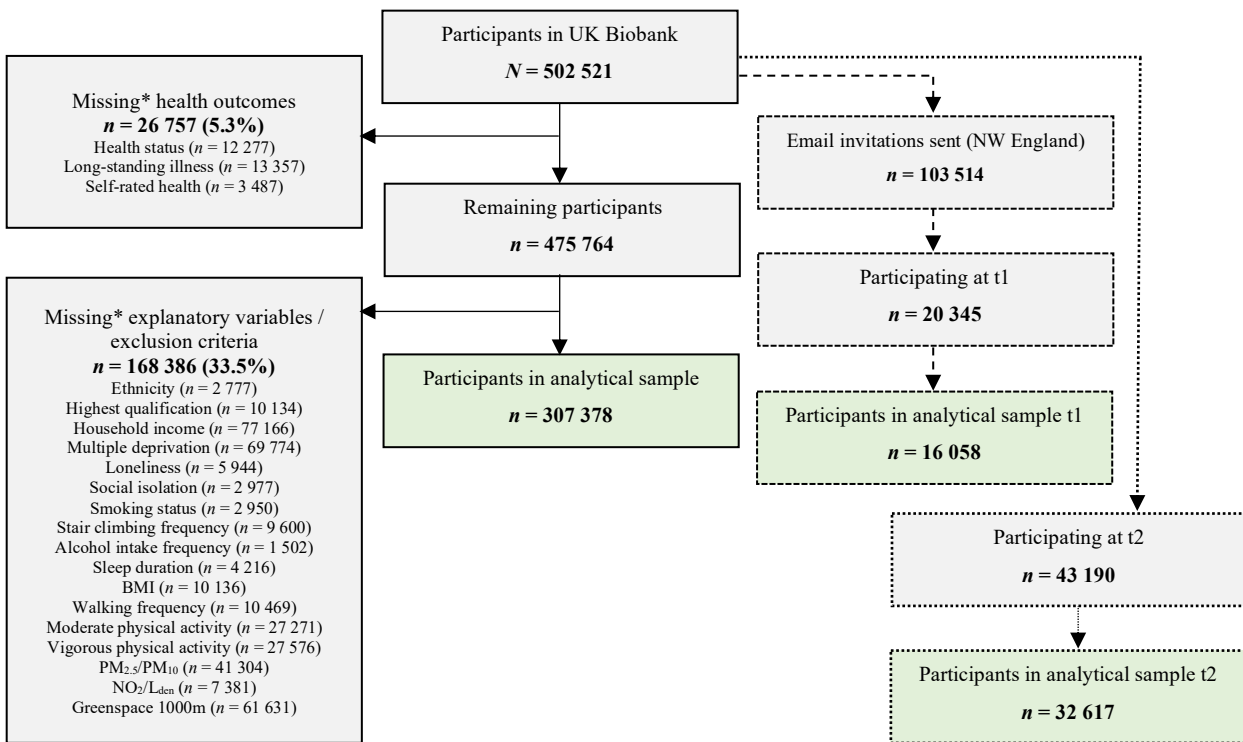

**Figure S1.** Flowchart of study population. t1 = follow-up during first revisit between 2012–2013; t2 = follow-up during UK Biobank Imaging Study between 2014–2019. BMI = body mass index; PM = particulate matter; NO<sub>2</sub> = nitrogen dioxide; L<sub>den</sub> = day-evening-night noise level. \*Numbers for missing data for individual variables are not mutually exclusive and include “prefer not to answer” and “do not know”.

**Table S2. Baseline characteristics**

| Table S2. <b>Baseline characteristics</b> | Full sample<br>( <i>N</i> = 502 521) | Analytical sample<br>( <i>n</i> = 307 378) |
|-------------------------------------------|--------------------------------------|--------------------------------------------|
| <b>Health indicators</b>                  |                                      |                                            |
| <b>Health status</b>                      |                                      |                                            |
| Unhealthy                                 | 162 096 (32.3%)                      | 95 177 (31.0%)                             |
| Healthy                                   | 328 148 (65.3%)                      | 212 201 (69.0%)                            |
| Missing                                   | 12 277 (2.4%)                        |                                            |
| <b>Long-standing illness</b>              |                                      |                                            |
| Yes                                       | 159 904 (31.8%)                      | 93 757 (30.5%)                             |
| No                                        | 329 260 (65.5%)                      | 213 621 (69.5%)                            |
| Prefer not to answer                      | 1 052 (0.2%)                         |                                            |
| Do not know                               | 11 387 (2.3%)                        |                                            |
| Missing                                   | 918 (0.2%)                           |                                            |
| <b>Self-rated health</b>                  |                                      |                                            |
| Poor                                      | 22 778 (4.5%)                        | 11 066 (3.6%)                              |
| Fair                                      | 105 373 (21.0%)                      | 59 169 (19.2%)                             |
| Good                                      | 289 023 (57.5%)                      | 182 699 (59.4%)                            |
| Excellent                                 | 81 860 (16.3%)                       | 54 444 (17.7%)                             |
| Prefer not to answer                      | 365 (0.1%)                           |                                            |
| Do not know                               | 2 204 (0.4%)                         |                                            |
| Missing                                   | 918 (0.2%)                           |                                            |
| <b>Sociodemographic characteristics</b>   |                                      |                                            |
| <b>Age</b>                                |                                      |                                            |
| Mean (SD)                                 | 56.53 (8.10)                         | 56.11 (8.01)                               |
| Range                                     | 37-73                                | 38-73                                      |
| <b>Sex</b>                                |                                      |                                            |
| Female                                    | 273 394 (54.4%)                      | 159 574 (51.9%)                            |
| Male                                      | 229 127 (45.6%)                      | 147 804 (48.1%)                            |
| <b>Ethnicity</b>                          |                                      |                                            |
| White                                     | 472 711 (94.1%)                      | 293 565 (95.5%)                            |
| Mixed-race                                | 2 958 (0.6%)                         | 1 766 (0.6%)                               |
| Black                                     | 8 061 (1.6%)                         | 4 257 (1.4%)                               |
| Asian                                     | 9 882 (2.0%)                         | 4 755 (1.5%)                               |
| Chinese                                   | 1 574 (0.3%)                         | 818 (0.3%)                                 |
| Other                                     | 4 558 (0.9%)                         | 2 217 (0.7%)                               |
| Prefer not to answer                      | 1 662 (0.3%)                         |                                            |
| Do not know                               | 217 (0.0%)                           |                                            |
| Missing                                   | 898 (0.2%)                           |                                            |
| <b>Highest qualification</b>              |                                      |                                            |
| None                                      | 85 274 (17.0%)                       | 39 828 (13.0%)                             |
| O levels/GCSEs/CSEs                       | 132 086 (26.3%)                      | 84 448 (27.5%)                             |
| A levels/NVQ/HND/HNC <sup>1</sup>         | 113 859 (22.7%)                      | 72 584 (23.6%)                             |
| Degree                                    | 161 168 (32.1%)                      | 110 518 (36.0%)                            |
| Prefer not to answer                      | 5 493 (1.1%)                         |                                            |
| Missing                                   | 4 641 (0.9%)                         |                                            |
| <b>Household income<sup>2</sup></b>       |                                      |                                            |
| Very low                                  | 97 205 (19.3%)                       | 63 099 (20.5%)                             |
| Low                                       | 108 177 (21.5%)                      | 77 931 (25.4%)                             |
| Medium                                    | 110 774 (22.0%)                      | 82 338 (26.8%)                             |
| High                                      | 86 269 (17.2%)                       | 66 106 (21.5%)                             |
| Very high                                 | 22 930 (4.6%)                        | 17 904 (5.8%)                              |
| Prefer not to answer                      | 49 848 (9.9%)                        |                                            |
| Do not know                               | 21 305 (4.2%)                        |                                            |
| Missing                                   | 6 013 (1.2%)                         |                                            |
| <b>Multiple deprivation</b>               |                                      |                                            |
| Mean (SD)                                 | 17.68 (14.01)                        | 16.77 (13.33)                              |
| Range                                     | 0.61-82                              | 0.61-82                                    |
| Missing                                   | 69 774 (13.1%)                       |                                            |
| <b>Psychosocial factors</b>               |                                      |                                            |
| <b>Loneliness</b>                         |                                      |                                            |
| Not lonely                                | 466 182 (92.8%)                      | 289 901 (94.3%)                            |
| Lonely                                    | 30 395 (6.0%)                        | 17 477 (5.7%)                              |
| Missing                                   | 5 944 (1.2%)                         |                                            |
| <b>Social isolation</b>                   |                                      |                                            |
| Not isolated                              | 453 401 (90.2%)                      | 280 931 (91.4%)                            |
| Isolated                                  | 46 143 (9.2%)                        | 26 447 (8.6%)                              |
| Missing                                   | 2 977 (0.6%)                         |                                            |
| <b>Lifestyle factors</b>                  |                                      |                                            |
| <b>Smoking status</b>                     |                                      |                                            |
| Never                                     | 273 528 (54.4%)                      | 168 475 (54.8%)                            |
| Former                                    | 173 064 (34.4%)                      | 108 638 (35.3%)                            |
| Current                                   | 52 979 (10.5%)                       | 30 265 (9.8%)                              |

|                                                  |                          |                 |
|--------------------------------------------------|--------------------------|-----------------|
| Prefer not to answer                             | 2 059 (0.4%)             |                 |
| Missing                                          | 891 (0.2%)               |                 |
| <b>Stair climbing frequency</b>                  |                          |                 |
| None                                             | 44 988 (9.0%)            | 24 049 (7.8%)   |
| 1-5/day                                          | 100 569 (20.0%)          | 58 267 (19.0%)  |
| 6-10/day                                         | 178 969 (35.6%)          | 115 982 (37.7%) |
| 11-15/day                                        | 91 352 (18.2%)           | 60 315 (19.6%)  |
| 16-20/day                                        | 42 477 (8.5%)            | 27 609 (9.0%)   |
| 20+/day                                          | 34 566 (6.9%)            | 21 156 (6.9%)   |
| Prefer not to answer                             | 461 (0.1%)               |                 |
| Do not know                                      | 2 580 (0.5%)             |                 |
| Missing                                          | 6 559 (1.3%)             |                 |
| <b>Alcohol intake frequency</b>                  |                          |                 |
| Never                                            | 40 645 (8.1%)            | 20 423 (6.6%)   |
| Special occasions                                | 58 011 (11.5%)           | 31 526 (10.3%)  |
| 1-3/month                                        | 55 856 (11.1%)           | 33 798 (11.0%)  |
| 1-2/week                                         | 129 294 (25.7%)          | 78 777 (25.6%)  |
| 3-4/week                                         | 115 443 (23.0%)          | 75 251 (24.5%)  |
| Daily/almost daily                               | 10 770 (20.3%)           | 67 603 (22.0%)  |
| Prefer not to answer                             | 605 (0.1%)               |                 |
| Missing                                          | 897 (0.2%)               |                 |
| <b>Sleep duration (hours/day)</b>                |                          |                 |
| Mean (SD)                                        | 7.15 (1.11)*             | 7.16 (1.06)     |
| Range                                            | 1-23 <sup>†</sup>        | 1-20            |
| Prefer not to answer                             | 386 (0.1%)               |                 |
| Do not know                                      | 2943 (0.6%)              |                 |
| Missing                                          | 887 (0.2%)               |                 |
| <b>BMI (kg/m<sup>2</sup>)</b>                    |                          |                 |
| Mean (SD)                                        | 27.43 (4.79)             | 27.27 (4.67)    |
| Range                                            | 12.80-68.40              | 12.80-67.30     |
| Missing                                          | 10 136 (2.0%)            |                 |
| <b>Walking (days/week)<sup>3</sup></b>           |                          |                 |
| Mean (SD)                                        | 5.39 (1.93) <sup>§</sup> | 5.36 (1.95)     |
| Range                                            | 0-7 <sup>§</sup>         | 0-7             |
| Prefer not to answer                             | 979 (0.2%)               |                 |
| Do not know                                      | 6 687 (1.3%)             |                 |
| Unable to walk                                   | 1 929 (0.4%)             |                 |
| Missing                                          | 874 (0.2%)               |                 |
| <b>Moderate activity (days/week)<sup>3</sup></b> |                          |                 |
| Mean (SD)                                        | 3.63 (2.33) <sup>‡</sup> | 3.59 (2.32)     |
| Range                                            | 0-7 <sup>‡</sup>         | 0-7             |
| Prefer not to answer                             | 2 273 (0.5%)             |                 |
| Do not know                                      | 24 120 (4.8%)            |                 |
| Missing                                          | 878 (0.2%)               |                 |
| <b>Vigorous activity (days/week)<sup>3</sup></b> |                          |                 |
| Mean (SD)                                        | 1.84 (1.96) <sup>§</sup> | 1.876 (1.94)    |
| Range                                            | 0-7 <sup>§</sup>         | 0-7             |
| Prefer not to answer                             | 4 116 (0.8%)             |                 |
| Do not know                                      | 22 582 (4.5%)            |                 |
| Missing                                          | 878 (0.2%)               |                 |
| <b>Environmental exposures</b>                   |                          |                 |
| <b>PM<sub>2.5</sub></b>                          |                          |                 |
| Mean (SD)                                        | 9.99 (1.06)              | 9.95 (1.04)     |
| Range                                            | 8.17-21.31               | 8.17-21.25      |
| Missing                                          | 41 304 (8.2%)            |                 |
| <b>PM<sub>10</sub></b>                           |                          |                 |
| Mean (SD)                                        | 16.24 (1.90)             | 16.19 (1.88)    |
| Range                                            | 11.78-31.39              | 11.78-30.65     |
| Missing                                          | 41 304 (8.2%)            |                 |
| <b>NO<sub>2</sub></b>                            |                          |                 |
| Mean (SD)                                        | 26.71 (7.58)             | 26.44 (7.56)    |
| Range                                            | 12.93-108.49             | 12.93-108.49    |
| Missing                                          | 7 381 (1.5%)             |                 |
| <b>L<sub>den</sub></b>                           |                          |                 |
| Mean (SD)                                        | 56.06 (4.28)             | 56.01 (4.24)    |
| Range                                            | 51.54-93.36              | 51.55-89.29     |
| Missing                                          | 7 381 (1.5%)             |                 |
| <b>Greenspace 1000m</b>                          |                          |                 |
| Mean (SD)                                        | 44.99 (21.62)            | 45.52 (21.77)   |
| Range                                            | 4.42-99.19               | 4.49-99.19      |
| Missing                                          | 61 631 (12.3%)           |                 |

Note: GCSEs = general certificate of secondary education; CSE = certificate of secondary education; NVQ = national vocational qualification; HND = higher national diploma; HNC = higher national certificate; BMI = body mass index; PM = particulate matter; NO<sub>2</sub> = nitrogen dioxide; L<sub>den</sub> = day-evening-night noise level. <sup>1</sup>also includes 'other professional qualifications'. <sup>2</sup>Annual household income groups: very low (<£18,000), low

---

(£18,000–£30,999), middle (£31,000–£51,999), high (£52,000–£100,000) and very high (>£100,000). <sup>3</sup>number of days per week engaging in these activities for 10+ minutes continuously. <sup>4</sup>*n*=498 305; <sup>5</sup>*n*=492 052; <sup>6</sup>*n*=475 250; <sup>5</sup>*n*=474 945.

**Additional information**

Descriptive statistic in manuscript on duration living at current address does not include participants who lived at their current address for <1 year (*n* = 4,781), but these individuals were included in all other analyses. The average number of days between the baseline assessment and the air pollution exposure estimate (calculated based on the midpoint between 26 January 2010 and 18 January 2011) was 491 days (SD = 285; range = –56 to 1312). The corresponding figures for traffic noise were 105 days (SD = 285; range = –442 to 926).



Figures S2-S3. Self-reported illnesses

Cancer illnesses

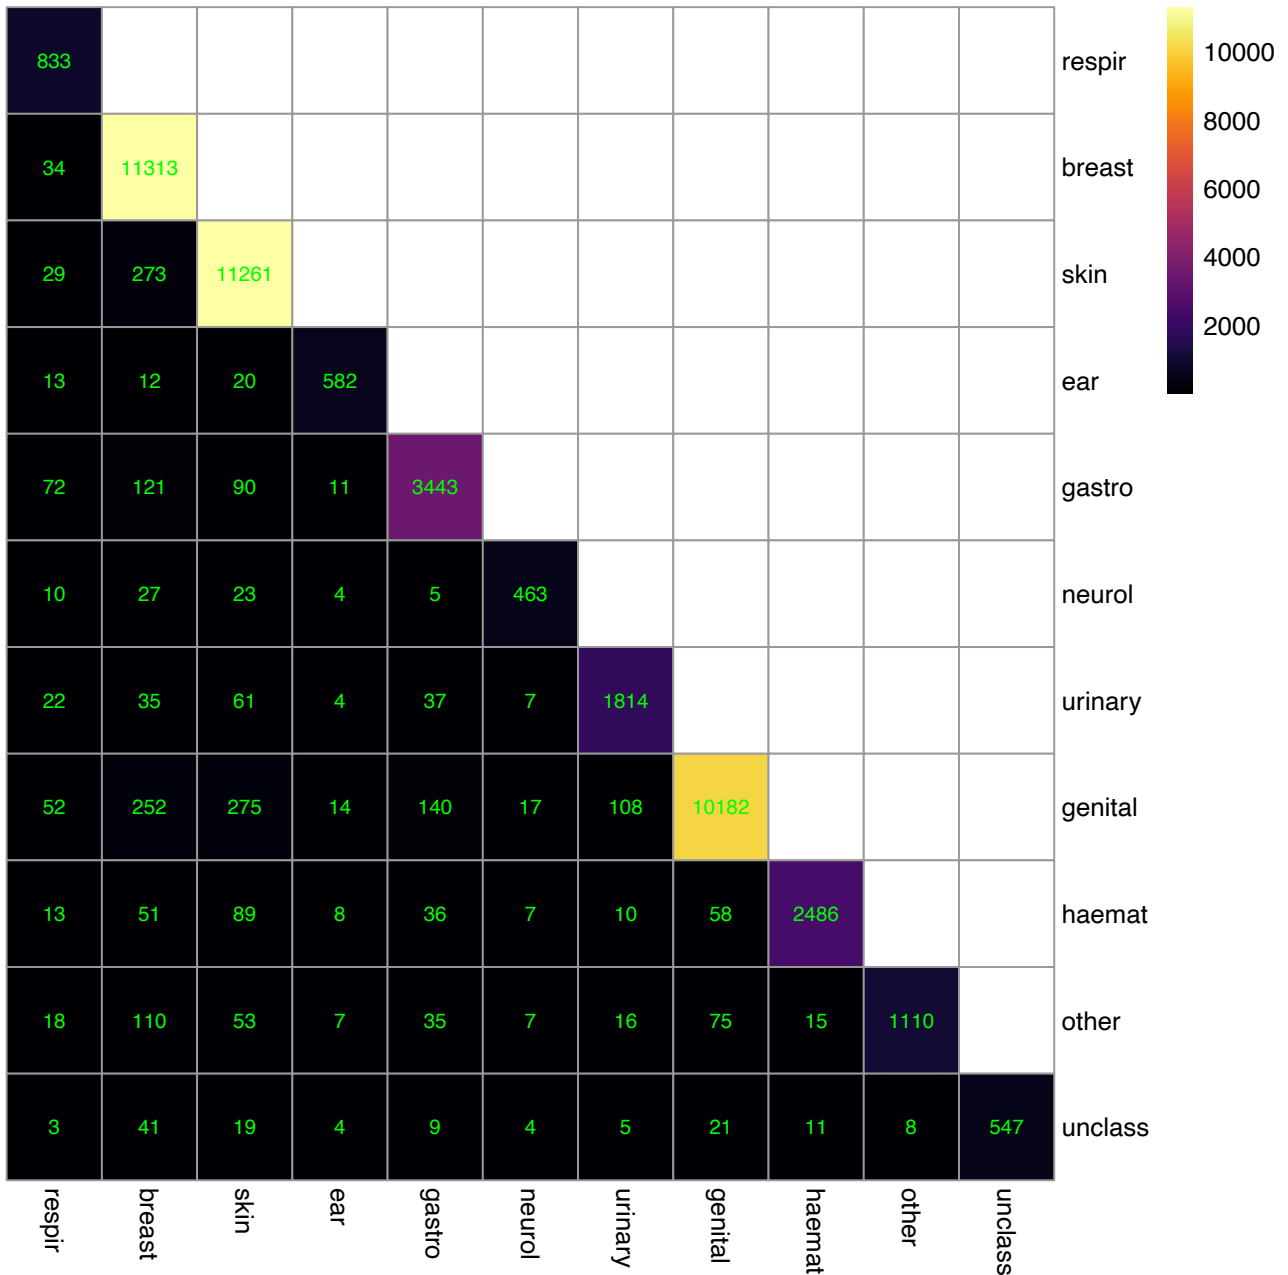

**Figure S2.** Self-reported cancer illnesses. Cell entries reflect the number of individuals with  $\geq 1$  cancer illness of the group in the corresponding row and  $\geq 1$  cancer illness of the group in the corresponding column (e.g. 273 participants report  $\geq 1$  breast cancer and  $\geq 1$  skin cancer). Cell entries in the diagonal reflect the number of participants with  $\geq 1$  cancer illness of the group in the corresponding row or column (e.g. 11 313 participants report  $\geq 1$  breast cancer). breast = breast cancer; skin = skin cancer; genital = genital tract cancer; gastro = gastrointestinal cancer; haemat = haematological malignancy; urinary = urinary tract cancer; other = other cancer; respir = respiratory / intrathoracic cancer; ear = ear/nose/throat cancer; neurol = neurological system cancer; unclass = unclassifiable.

Non-cancer illnesses

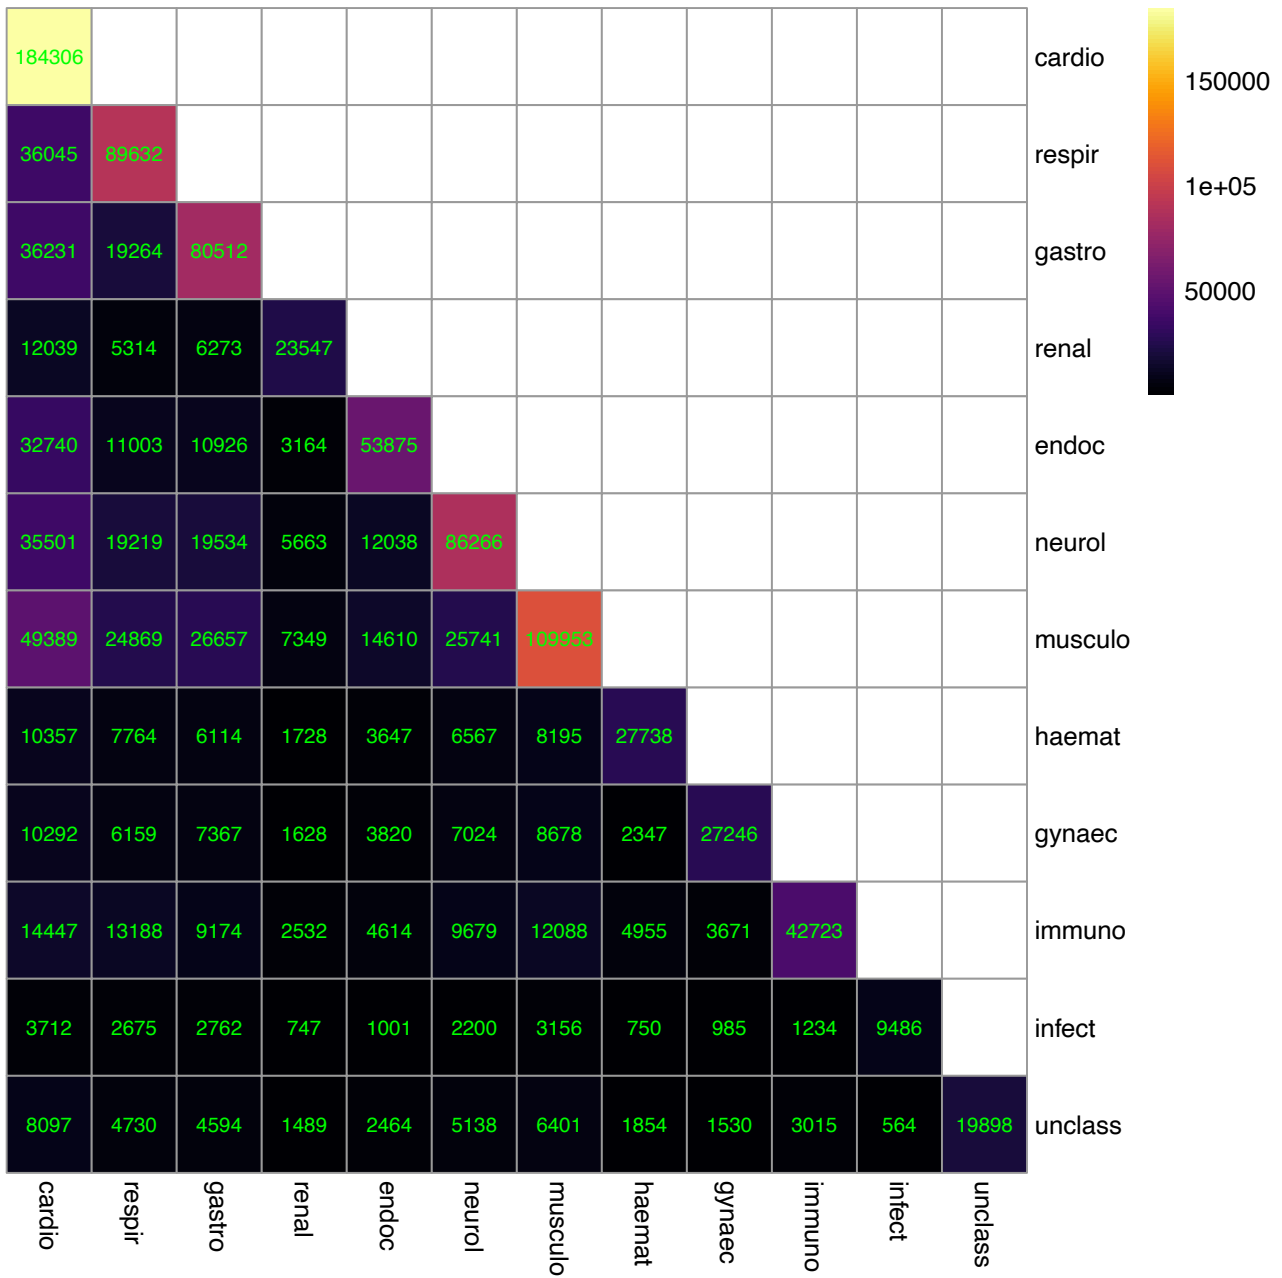

**Figure S3.** Self-reported non-cancer illnesses. Cell entries reflect the number of individuals with  $\geq 1$  non-cancer illness of the group in the corresponding row and  $\geq 1$  non-cancer illness of the group in the corresponding column (e.g. 3 712 participants report  $\geq 1$  cardiovascular illness and  $\geq 1$  infection). Cell entries in the diagonal reflect the number of participants with  $\geq 1$  non-cancer illness of the group in the corresponding row or column (e.g. 184 306 participants report  $\geq 1$  cardiovascular illness). cardio = cardiovascular; musculo = musculoskeletal/trauma; endoc = endocrine/diabetes; immuno = immunological/systemic disorders; haemat = haematology/dermatology; gynaec = gynaecology/breast; renal = renal/urology; infect = infections; unclass = unclassifiable; respir = respiratory/ent; gastro = gastrointestinal/abdominal; neurol = neurology/eye/psychiatry.

Figure S4. Correlation matrix continuous variables

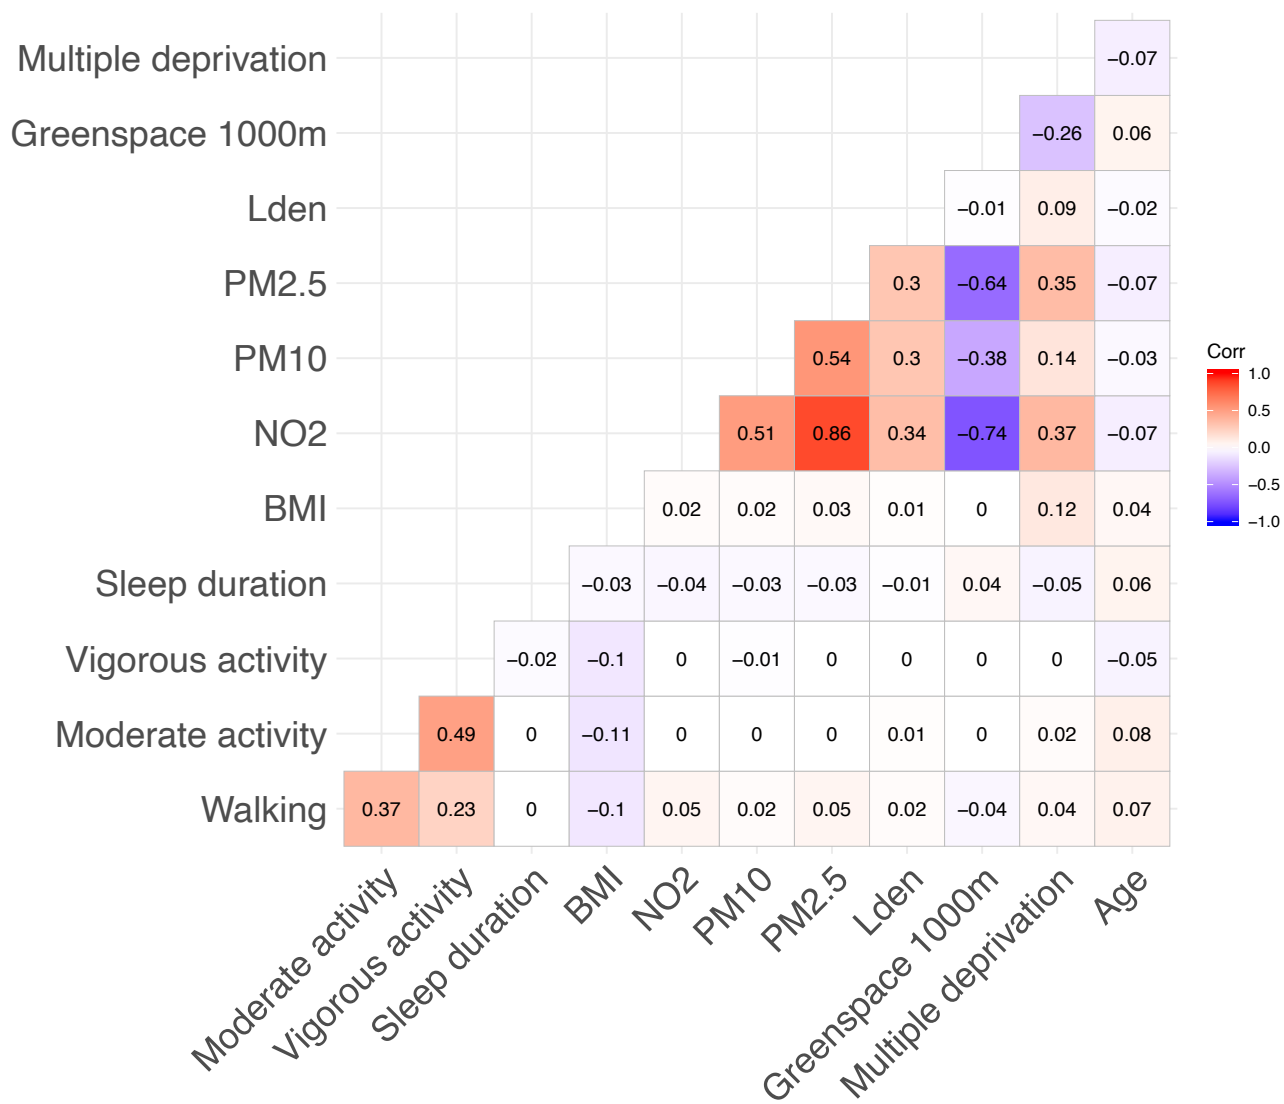

Figure S4. Correlation matrix of continuous explanatory variables.

**Tables S3-S5. Descriptive statistics stratified by health indicators**

Stratified by health status

| Table S3. Baseline characteristics stratified by health status | Unhealthy<br>(n = 95 177) | Healthy<br>(n = 212 201) | p value |
|----------------------------------------------------------------|---------------------------|--------------------------|---------|
| <b>Sociodemographic characteristics</b>                        |                           |                          |         |
| <b>Age</b>                                                     |                           |                          | < 0.001 |
| Mean (SD)                                                      | 58.46 (7.57)              | 55.05 (8.06)             |         |
| Range                                                          | 38.00-72.00               | 39.00-73.00              |         |
| <b>Sex</b>                                                     |                           |                          | < 0.001 |
| Female                                                         | 47 016 (49.4%)            | 112 558 (53.0%)          |         |
| Male                                                           | 48 161 (50.6%)            | 99 643 (47.0%)           |         |
| <b>Ethnicity</b>                                               |                           |                          | < 0.001 |
| White                                                          | 91 415 (96.0%)            | 202 150 (95.3%)          |         |
| Mixed-race                                                     | 456 (0.5%)                | 1 310 (0.6%)             |         |
| Black                                                          | 1 099 (1.2%)              | 3 158 (1.5%)             |         |
| Asian                                                          | 1 461 (1.5%)              | 3 294 (1.6%)             |         |
| Chinese                                                        | 142 (0.1%)                | 676 (0.3%)               |         |
| Other                                                          | 604 (0.6%)                | 1 613 (0.8%)             |         |
| <b>Highest qualification</b>                                   |                           |                          | < 0.001 |
| None                                                           | 16 351 (17.2%)            | 23 477 (11.1%)           |         |
| O levels/GCSEs/CSEs                                            | 25 045 (26.3%)            | 59 403 (28.0%)           |         |
| A levels/NVQ/HND/HNC <sup>1</sup>                              | 22 885 (24.0%)            | 49 699 (23.4%)           |         |
| Degree                                                         | 30 896 (32.5%)            | 79 622 (37.5%)           |         |
| <b>Household income<sup>2</sup></b>                            |                           |                          | < 0.001 |
| Very low                                                       | 26 699 (28.1%)            | 36 400 (17.2%)           |         |
| Low                                                            | 26 029 (27.3%)            | 51 902 (24.5%)           |         |
| Medium                                                         | 22 610 (23.8%)            | 59 728 (28.1%)           |         |
| High                                                           | 15 769 (16.6%)            | 50 337 (23.7%)           |         |
| Very high                                                      | 4 070 (4.3%)              | 13 834 (6.5%)            |         |
| <b>Multiple deprivation</b>                                    |                           |                          | < 0.001 |
| Mean (SD)                                                      | 17.89 (14.15)             | 16.27 (12.92)            |         |
| Range                                                          | 0.61-82.00                | 0.61-82.00               |         |
| <b>Psychosocial factors</b>                                    |                           |                          |         |
| <b>Loneliness</b>                                              |                           |                          | < 0.001 |
| Not lonely                                                     | 88 594 (93.1%)            | 201 307 (94.9%)          |         |
| Lonely                                                         | 6 583 (6.9%)              | 10 894 (5.1%)            |         |
| <b>Social isolation</b>                                        |                           |                          | < 0.001 |
| Not isolated                                                   | 85 472 (89.8%)            | 195 459 (92.1%)          |         |
| Isolated                                                       | 9 705 (10.2%)             | 16 742 (7.9%)            |         |
| <b>Lifestyle factors</b>                                       |                           |                          |         |
| <b>Smoking status</b>                                          |                           |                          | < 0.001 |
| Never                                                          | 46 457 (48.8%)            | 122 018 (57.5%)          |         |
| Former                                                         | 38 354 (40.3%)            | 70 284 (33.1%)           |         |
| Current                                                        | 10 366 (10.9%)            | 19 899 (9.4%)            |         |
| <b>Stair climbing frequency</b>                                |                           |                          | < 0.001 |
| None                                                           | 9 590 (10.1%)             | 14 459 (6.8%)            |         |
| 1-5/day                                                        | 19 676 (20.7%)            | 38 591 (18.2%)           |         |
| 6-10/day                                                       | 34 711 (36.5%)            | 81 271 (38.3%)           |         |
| 11-15/day                                                      | 17 466 (18.4%)            | 42 849 (20.2%)           |         |
| 16-20/day                                                      | 7 918 (8.3%)              | 19 691 (9.3%)            |         |
| 20+/day                                                        | 5 816 (6.1%)              | 15 340 (7.2%)            |         |
| <b>Alcohol intake frequency</b>                                |                           |                          | < 0.001 |
| Never                                                          | 8 582 (9.0%)              | 11 841 (5.6%)            |         |
| Special occasions                                              | 11 621 (12.2%)            | 19 905 (9.4%)            |         |
| 1-3/month                                                      | 10 505 (11.0%)            | 23 293 (11.0%)           |         |
| 1-2/week                                                       | 22 890 (24.0%)            | 55 887 (26.3%)           |         |
| 3-4/week                                                       | 20 899 (22.0%)            | 54 352 (25.6%)           |         |
| Daily/almost daily                                             | 20 680 (21.7%)            | 46 923 (22.1%)           |         |
| <b>Sleep duration (hours/day)</b>                              |                           |                          | < 0.001 |
| Mean (SD)                                                      | 7.19 (1.19)               | 7.14 (0.99)              |         |
| Range                                                          | 1.00-20.00                | 1.00-20.00               |         |
| <b>BMI (kg/m<sup>2</sup>)</b>                                  |                           |                          | < 0.001 |
| Mean (SD)                                                      | 27.96 (5.06)              | 26.96 (4.44)             |         |
| Range                                                          | 12.80-66.20               | 12.80-67.30              |         |
| <b>Walking (days/week)<sup>3</sup></b>                         |                           |                          | < 0.001 |
| Mean (SD)                                                      | 5.34 (1.98)               | 5.37 (1.93)              |         |
| Range                                                          | 0.00-7.00                 | 0.00-7.00                |         |
| <b>Moderate activity (days/week)<sup>3</sup></b>               |                           |                          | < 0.001 |
| Mean (SD)                                                      | 3.55 (2.37)               | 3.60 (2.30)              |         |
| Range                                                          | 0.00-7.00                 | 0.00-7.00                |         |
| <b>Vigorous activity (days/week)<sup>3</sup></b>               |                           |                          | < 0.001 |
| Mean (SD)                                                      | 1.73 (1.96)               | 1.94 (1.93)              |         |

| Range                          | 0.00-7.00     | 0.00-7.00     |         |
|--------------------------------|---------------|---------------|---------|
| <b>Environmental exposures</b> |               |               |         |
| <b>PM<sub>2.5</sub></b>        |               |               | < 0.001 |
| Mean (SD)                      | 9.98 (1.05)   | 9.94 (1.03)   |         |
| Range                          | 8.17-21.25    | 8.17-19.89    |         |
| <b>PM<sub>10</sub></b>         |               |               | < 0.001 |
| Mean (SD)                      | 16.21 (1.88)  | 16.18 (1.88)  |         |
| Range                          | 11.78-30.65   | 11.78-30.65   |         |
| <b>NO<sub>2</sub></b>          |               |               | < 0.001 |
| Mean (SD)                      | 26.55 (7.60)  | 26.38 (7.54)  |         |
| Range                          | 12.93-107.07  | 12.93-108.49  |         |
| <b>L<sub>den</sub></b>         |               |               | < 0.001 |
| Mean (SD)                      | 56.05 (4.29)  | 55.99 (4.22)  |         |
| Range                          | 51.55-86.50   | 51.55-89.29   |         |
| <b>Greenspace 1000m</b>        |               |               | 0.750   |
| Mean (SD)                      | 45.50 (21.57) | 45.53 (21.86) |         |
| Range                          | 4.67-99.18    | 4.49-99.19    |         |

*Note:* GCSEs = general certificate of secondary education; CSE = certificate of secondary education; NVQ = national vocational qualification; HND = higher national diploma; HNC = higher national certificate; BMI = body mass index; PM = particulate matter; NO<sub>2</sub> = nitrogen dioxide; L<sub>den</sub> = day-evening-night noise level. <sup>1</sup>also includes 'other professional qualifications'. <sup>2</sup>Annual household income groups: very low (<£18,000), low (£18,000–£30,999), middle (£31,000–£51,999), high (£52,000–£100,000) and very high (>£100,000). <sup>3</sup>number of days per week engaging in these activities for 10+ minutes continuously.

Stratified by long-standing illness

Table S4. Baseline characteristics stratified by long-standing illness

|                                                  | Yes<br>(n = 93 757) | No<br>(n = 213 621) | p value |
|--------------------------------------------------|---------------------|---------------------|---------|
| <b>Sociodemographic characteristics</b>          |                     |                     |         |
| <b>Age</b>                                       |                     |                     | < 0.001 |
| Mean (SD)                                        | 57.70 (7.67)        | 55.41 (8.14)        |         |
| Range                                            | 39.00-72.00         | 38.00-73.00         |         |
| <b>Sex</b>                                       |                     |                     | < 0.001 |
| Female                                           | 44 607 (47.6%)      | 114 967 (53.8%)     |         |
| Male                                             | 49 150 (52.4%)      | 98 654 (46.2%)      |         |
| <b>Ethnicity</b>                                 |                     |                     | < 0.001 |
| White                                            | 89 561 (95.5%)      | 204 004 (95.5%)     |         |
| Mixed-race                                       | 487 (0.5%)          | 1 279 (0.6%)        |         |
| Black                                            | 1 419 (1.5%)        | 2 838 (1.3%)        |         |
| Asian                                            | 1 429 (1.5%)        | 3 326 (1.6%)        |         |
| Chinese                                          | 163 (0.2%)          | 655 (0.3%)          |         |
| Other                                            | 698 (0.7%)          | 1 519 (0.7%)        |         |
| <b>Highest qualification</b>                     |                     |                     | < 0.001 |
| None                                             | 15 643 (16.7%)      | 24 185 (11.3%)      |         |
| O levels/GCSEs/CSEs                              | 24 847 (26.5%)      | 59 601 (27.9%)      |         |
| A levels/NVQ/HND/HNC <sup>1</sup>                | 23 010 (24.5%)      | 49 574 (23.2%)      |         |
| Degree                                           | 30 257 (32.3%)      | 80 261 (37.6%)      |         |
| <b>Household income<sup>2</sup></b>              |                     |                     | < 0.001 |
| Very low                                         | 27 247 (29.1%)      | 35 852 (16.8%)      |         |
| Low                                              | 25 264 (26.9%)      | 52 667 (24.7%)      |         |
| Medium                                           | 22 387 (23.9%)      | 59 951 (28.1%)      |         |
| High                                             | 15 291 (16.3%)      | 50 815 (23.8%)      |         |
| Very high                                        | 3 568 (3.8%)        | 14 336 (6.7%)       |         |
| <b>Multiple deprivation</b>                      |                     |                     | < 0.001 |
| Mean (SD)                                        | 18.79 (14.62)       | 15.89 (12.63)       |         |
| Range                                            | 0.61-82.00          | 0.61-82.00          |         |
| <b>Psychosocial factors</b>                      |                     |                     |         |
| <b>Loneliness</b>                                |                     |                     | < 0.001 |
| Not lonely                                       | 86 392 (92.1%)      | 203 509 (95.3%)     |         |
| Lonely                                           | 7 365 (7.9%)        | 10 112 (4.7%)       |         |
| <b>Social isolation</b>                          |                     |                     | < 0.001 |
| Not isolated                                     | 83 385 (88.9%)      | 197 546 (92.5%)     |         |
| Isolated                                         | 10 372 (11.1%)      | 16 075 (7.5%)       |         |
| <b>Lifestyle factors</b>                         |                     |                     |         |
| <b>Smoking status</b>                            |                     |                     | < 0.001 |
| Never                                            | 45 946 (49.0%)      | 122 529 (57.4%)     |         |
| Former                                           | 37 269 (39.8%)      | 71 369 (33.4%)      |         |
| Current                                          | 10 542 (11.2%)      | 19 723 (9.2%)       |         |
| <b>Stair climbing frequency</b>                  |                     |                     | < 0.001 |
| None                                             | 9 858 (10.5%)       | 14 191 (6.6%)       |         |
| 1-5/day                                          | 20 726 (22.1%)      | 37 541 (17.6%)      |         |
| 6-10/day                                         | 33 819 (36.1%)      | 82 163 (38.5%)      |         |
| 11-15/day                                        | 16 446 (17.5%)      | 43 869 (20.5%)      |         |
| 16-20/day                                        | 7 373 (7.9%)        | 20 236 (9.5%)       |         |
| 20+/day                                          | 5 535 (5.9%)        | 15 621 (7.3%)       |         |
| <b>Alcohol intake frequency</b>                  |                     |                     | < 0.001 |
| Never                                            | 9 151 (9.8%)        | 11 272 (5.3%)       |         |
| Special occasions                                | 12 274 (13.1%)      | 19 252 (9.0%)       |         |
| 1-3/month                                        | 11 083 (11.8%)      | 22 715 (10.6%)      |         |
| 1-2/week                                         | 22 588 (24.1%)      | 56 189 (26.3%)      |         |
| 3-4/week                                         | 19 669 (21.0%)      | 55 582 (26.0%)      |         |
| Daily/almost daily                               | 18 992 (20.3%)      | 48 611 (22.8%)      |         |
| <b>Sleep duration (hours/day)</b>                |                     |                     | 0.671   |
| Mean (SD)                                        | 7.16 (1.24)         | 7.16 (0.96)         |         |
| Range                                            | 1.00-20.00          | 1.00-20.00          |         |
| <b>BMI (kg/m<sup>2</sup>)</b>                    |                     |                     | < 0.001 |
| Mean (SD)                                        | 28.46 (5.23)        | 26.75 (4.29)        |         |
| Range                                            | 12.80-67.30         | 12.80-66.00         |         |
| <b>Walking (days/week)<sup>3</sup></b>           |                     |                     | < 0.001 |
| Mean (SD)                                        | 5.26 (2.04)         | 5.41 (1.90)         |         |
| Range                                            | 0.00-7.00           | 0.00-7.00           |         |
| <b>Moderate activity (days/week)<sup>3</sup></b> |                     |                     | < 0.001 |
| Mean (SD)                                        | 3.47 (2.39)         | 3.64 (2.28)         |         |
| Range                                            | 0.00-7.00           | 0.00-7.00           |         |
| <b>Vigorous activity (days/week)<sup>3</sup></b> |                     |                     | < 0.001 |
| Mean (SD)                                        | 1.65 (1.95)         | 1.97 (1.93)         |         |
| Range                                            | 0.00-7.00           | 0.00-7.00           |         |
| <b>Environmental exposures</b>                   |                     |                     |         |

|                         |               |               |  |         |
|-------------------------|---------------|---------------|--|---------|
| <b>PM<sub>2.5</sub></b> |               |               |  | < 0.001 |
| Mean (SD)               | 10.01 (1.05)  | 9.93 (1.03)   |  |         |
| Range                   | 8.17-21.25    | 8.17-19.89    |  |         |
| <b>PM<sub>10</sub></b>  |               |               |  | < 0.001 |
| Mean (SD)               | 16.24 (1.86)  | 16.17 (1.88)  |  |         |
| Range                   | 11.78-30.65   | 11.78-30.65   |  |         |
| <b>NO<sub>2</sub></b>   |               |               |  | < 0.001 |
| Mean (SD)               | 26.77 (7.53)  | 26.29 (7.57)  |  |         |
| Range                   | 12.93-108.49  | 12.93-107.81  |  |         |
| <b>L<sub>den</sub></b>  |               |               |  | 0.002   |
| Mean (SD)               | 56.05 (4.28)  | 56.00 (4.22)  |  |         |
| Range                   | 51.55-86.50   | 51.55-89.29   |  |         |
| <b>Greenspace 1000m</b> |               |               |  | < 0.001 |
| Mean (SD)               | 44.97 (21.27) | 45.76 (21.98) |  |         |
| Range                   | 4.54-99.19    | 4.49-99.18    |  |         |

*Note:* GCSEs = general certificate of secondary education; CSE = certificate of secondary education; NVQ = national vocational qualification; HND = higher national diploma; HNC = higher national certificate; BMI = body mass index; PM = particulate matter; NO<sub>2</sub> = nitrogen dioxide; L<sub>den</sub> = day-evening-night noise level. <sup>1</sup>also includes 'other professional qualifications'. <sup>2</sup>Annual household income groups: very low (<£18,000), low (£18,000–£30,999), middle (£31,000–£51,999), high (£52,000–£100,000) and very high (>£100,000). <sup>3</sup>number of days per week engaging in these activities for 10+ minutes continuously.

Baseline characteristics stratified by self-rated health

Table S5. **Baseline characteristics stratified by self-rated health**

|                                                  | Poor<br>(n = 11 066) | Fair<br>(n = 59 169) | Good<br>(n = 182 699) | Excellent<br>(n = 54 444) | p value |
|--------------------------------------------------|----------------------|----------------------|-----------------------|---------------------------|---------|
| <b>Sociodemographic characteristics</b>          |                      |                      |                       |                           |         |
| <b>Age</b>                                       |                      |                      |                       |                           | < 0.001 |
| Mean (SD)                                        | 55.91 (7.77)         | 56.19 (8.09)         | 56.25 (8.07)          | 55.58 (8.06)              |         |
| Range                                            | 40.00-72.00          | 39.00-73.00          | 38.00-72.00           | 39.00-71.00               |         |
| <b>Sex</b>                                       |                      |                      |                       |                           | < 0.001 |
| Female                                           | 4 991 (45.1%)        | 27 657 (46.7%)       | 97 197 (53.2%)        | 29 729 (54.6%)            |         |
| Male                                             | 6 075 (54.9%)        | 31 512 (53.3%)       | 85 502 (46.8%)        | 24 715 (45.4%)            |         |
| <b>Ethnicity</b>                                 |                      |                      |                       |                           | < 0.001 |
| White                                            | 10 299 (93.1%)       | 55 498 (93.8%)       | 175 085 (95.8%)       | 52 683 (96.8%)            |         |
| Mixed-race                                       | 82 (0.7%)            | 401 (0.7%)           | 999 (0.5%)            | 284 (0.5%)                |         |
| Black                                            | 236 (2.1%)           | 1 127 (1.9%)         | 2 359 (1.3%)          | 535 (1.0%)                |         |
| Asian                                            | 311 (2.8%)           | 1 391 (2.4%)         | 2 538 (1.4%)          | 515 (0.9%)                |         |
| Chinese                                          | 21 (0.2%)            | 184 (0.3%)           | 499 (0.3%)            | 114 (0.2%)                |         |
| Other                                            | 117 (1.1%)           | 568 (1.0%)           | 1 219 (0.7%)          | 313 (0.6%)                |         |
| <b>Highest qualification</b>                     |                      |                      |                       |                           | < 0.001 |
| None                                             | 2 723 (24.6%)        | 10 888 (18.4%)       | 21 910 (12.0%)        | 4 307 (7.9%)              |         |
| O levels/GCSEs/CSEs                              | 3 133 (28.3%)        | 17 564 (29.7%)       | 51 129 (28.0%)        | 12 622 (23.2%)            |         |
| A levels/NVQ/HND/HNC <sup>1</sup>                | 2 664 (24.1%)        | 14 193 (24.0%)       | 43 648 (23.9%)        | 12 079 (22.2%)            |         |
| Degree                                           | 2 546 (23.0%)        | 16 524 (27.9%)       | 66 012 (36.1%)        | 25 436 (46.7%)            |         |
| <b>Household income<sup>2</sup></b>              |                      |                      |                       |                           | < 0.001 |
| Very low                                         | 5 224 (47.2%)        | 16 903 (28.6%)       | 33 777 (18.5%)        | 7 195 (13.2%)             |         |
| Low                                              | 2 673 (24.2%)        | 15 853 (26.8%)       | 47 574 (26.0%)        | 11 831 (21.7%)            |         |
| Medium                                           | 1 889 (17.1%)        | 14 817 (25.0%)       | 50 698 (27.7%)        | 14 934 (27.4%)            |         |
| High                                             | 1 072 (9.7%)         | 9 699 (16.4%)        | 40 407 (22.1%)        | 14 928 (27.4%)            |         |
| Very high                                        | 208 (1.9%)           | 1 897 (3.2%)         | 10 243 (5.6%)         | 5 556 (10.2%)             |         |
| <b>Multiple deprivation</b>                      |                      |                      |                       |                           | < 0.001 |
| Mean (SD)                                        | 24.45 (16.97)        | 19.66 (14.84)        | 16.08 (12.72)         | 14.39 (11.60)             |         |
| Range                                            | 0.61-82.00           | 0.61-82.00           | 0.61-82.00            | 0.61-82.00                |         |
| <b>Psychosocial factors</b>                      |                      |                      |                       |                           |         |
| <b>Loneliness</b>                                |                      |                      |                       |                           | < 0.001 |
| Not lonely                                       | 9 116 (82.4%)        | 53 565 (90.5%)       | 174 338 (95.4%)       | 52 882 (97.1%)            |         |
| Lonely                                           | 1 950 (17.6%)        | 5 604 (9.5%)         | 8 361 (4.6%)          | 1 562 (2.9%)              |         |
| <b>Social isolation</b>                          |                      |                      |                       |                           | < 0.001 |
| Not isolated                                     | 8 848 (80.0%)        | 52 191 (88.2%)       | 168 805 (92.4%)       | 51 087 (93.8%)            |         |
| Isolated                                         | 2 218 (20.0%)        | 6 978 (11.8%)        | 13 894 (7.6%)         | 3 357 (6.2%)              |         |
| <b>Lifestyle factors</b>                         |                      |                      |                       |                           |         |
| <b>Smoking status</b>                            |                      |                      |                       |                           | < 0.001 |
| Never                                            | 4 517 (40.8%)        | 28 086 (47.5%)       | 102 052 (55.9%)       | 33 820 (62.1%)            |         |
| Former                                           | 4 259 (38.5%)        | 22 211 (37.5%)       | 64 552 (35.3%)        | 17 616 (32.4%)            |         |
| Current                                          | 2 290 (20.7%)        | 8 872 (15.0%)        | 16 095 (8.8%)         | 3 008 (5.5%)              |         |
| <b>Stair climbing frequency</b>                  |                      |                      |                       |                           | < 0.001 |
| None                                             | 1 830 (16.5%)        | 5 687 (9.6%)         | 13 311 (7.3%)         | 3 221 (5.9%)              |         |
| 1-5/day                                          | 3 674 (33.2%)        | 13 892 (23.5%)       | 32 466 (17.8%)        | 8 235 (15.1%)             |         |
| 6-10/day                                         | 3 263 (29.5%)        | 22 079 (37.3%)       | 70 409 (38.5%)        | 20 231 (37.2%)            |         |
| 11-15/day                                        | 1 270 (11.5%)        | 9 948 (16.8%)        | 37 158 (20.3%)        | 11 939 (21.9%)            |         |
| 16-20/day                                        | 568 (5.1%)           | 4 328 (7.3%)         | 16 862 (9.2%)         | 5 851 (10.7%)             |         |
| 20+/day                                          | 461 (4.2%)           | 3 235 (5.5%)         | 12 493 (6.8%)         | 4 967 (9.1%)              |         |
| <b>Alcohol intake frequency</b>                  |                      |                      |                       |                           | < 0.001 |
| Never                                            | 1 944 (17.6%)        | 5 319 (9.0%)         | 10 392 (5.7%)         | 2 768 (5.1%)              |         |
| Special occasions                                | 2 081 (18.8%)        | 8 077 (13.7%)        | 17 346 (9.5%)         | 4 022 (7.4%)              |         |
| 1-3/month                                        | 1 421 (12.8%)        | 7 222 (12.2%)        | 19 906 (10.9%)        | 5 249 (9.6%)              |         |
| 1-2/week                                         | 2 298 (20.8%)        | 14 795 (25.0%)       | 47 880 (26.2%)        | 13 804 (25.4%)            |         |
| 3-4/week                                         | 1 525 (13.8%)        | 12 256 (20.7%)       | 46 384 (25.4%)        | 15 086 (27.7%)            |         |
| Daily/almost daily                               | 1 797 (16.2%)        | 11 500 (19.4%)       | 40 791 (22.3%)        | 13 515 (24.8%)            |         |
| <b>Sleep duration (hours/day)</b>                |                      |                      |                       |                           | < 0.001 |
| Mean (SD)                                        | 7.13 (1.80)          | 7.07 (1.19)          | 7.17 (0.98)           | 7.23 (0.92)               |         |
| Range                                            | 1.00-20.00           | 1.00-16.00           | 1.00-20.00            | 2.00-18.00                |         |
| <b>BMI (kg/m<sup>2</sup>)</b>                    |                      |                      |                       |                           | < 0.001 |
| Mean (SD)                                        | 30.68 (6.72)         | 29.13 (5.29)         | 27.00 (4.27)          | 25.46 (3.50)              |         |
| Range                                            | 12.80-67.30          | 13.80-66.00          | 12.80-63.40           | 14.90-51.90               |         |
| <b>Walking (days/week)<sup>3</sup></b>           |                      |                      |                       |                           | < 0.001 |
| Mean (SD)                                        | 4.53 (2.44)          | 5.14 (2.06)          | 5.42 (1.88)           | 5.58 (1.84)               |         |
| Range                                            | 0.00-7.00            | 0.00-7.00            | 0.00-7.00             | 0.00-7.00                 |         |
| <b>Moderate activity (days/week)<sup>3</sup></b> |                      |                      |                       |                           | < 0.001 |
| Mean (SD)                                        | 2.65 (2.52)          | 3.29 (2.38)          | 3.63 (2.28)           | 3.97 (2.26)               |         |
| Range                                            | 0.00-7.00            | 0.00-7.00            | 0.00-7.00             | 0.00-7.00                 |         |
| <b>Vigorous activity (days/week)<sup>3</sup></b> |                      |                      |                       |                           | < 0.001 |
| Mean (SD)                                        | 0.98 (1.75)          | 1.46 (1.88)          | 1.89 (1.90)           | 2.45 (2.02)               |         |
| Range                                            | 0.00-7.00            | 0.00-7.00            | 0.00-7.00             | 0.00-7.00                 |         |
| <b>Environmental exposures</b>                   |                      |                      |                       |                           |         |



|                         |               |               |               |               |         |
|-------------------------|---------------|---------------|---------------|---------------|---------|
| <b>PM<sub>2.5</sub></b> |               |               |               |               | < 0.001 |
| Mean (SD)               | 10.19 (1.07)  | 10.05 (1.04)  | 9.93 (1.03)   | 9.88 (1.05)   |         |
| Range                   | 8.17-17.24    | 8.17-21.25    | 8.17-19.76    | 8.17-19.89    |         |
| <b>PM<sub>10</sub></b>  |               |               |               |               | < 0.001 |
| Mean (SD)               | 16.37 (1.83)  | 16.29 (1.85)  | 16.17 (1.88)  | 16.10 (1.91)  |         |
| Range                   | 11.78-25.48   | 11.78-30.65   | 11.78-30.65   | 11.78-29.90   |         |
| <b>NO<sub>2</sub></b>   |               |               |               |               | < 0.001 |
| Mean (SD)               | 28.01 (7.53)  | 27.13 (7.43)  | 26.27 (7.51)  | 25.93 (7.77)  |         |
| Range                   | 12.93-98.49   | 12.93-105.88  | 12.93-108.49  | 12.93-107.81  |         |
| <b>L<sub>den</sub></b>  |               |               |               |               | < 0.001 |
| Mean (SD)               | 56.17 (4.37)  | 56.08 (4.31)  | 55.99 (4.23)  | 55.97 (4.17)  |         |
| Range                   | 51.56-84.41   | 51.56-89.29   | 51.55-86.50   | 51.55-84.65   |         |
| <b>Greenspace 1000m</b> |               |               |               |               | < 0.001 |
| Mean (SD)               | 42.57 (20.15) | 44.00 (20.81) | 45.88 (21.81) | 46.54 (22.81) |         |
| Range                   | 6.45-98.60    | 6.08-99.14    | 4.49-99.18    | 4.67-99.19    |         |

*Note:* GCSEs = general certificate of secondary education; CSE = certificate of secondary education; NVQ = national vocational qualification; HND = higher national diploma; HNC = higher national certificate; BMI = body mass index; PM = particulate matter; NO<sub>2</sub> = nitrogen dioxide; L<sub>den</sub> = day-evening-night noise level. <sup>1</sup>also includes 'other professional qualifications'. <sup>2</sup>Annual household income groups: very low (<£18,000), low (£18,000–£30,999), middle (£31,000–£51,999), high (£52,000–£100,000) and very high (>£100,000). <sup>3</sup>number of days per week engaging in these activities for 10+ minutes continuously.

Tables S6-S9. Visual summary of findings

Lifestyle factors

| Variable                        | Outcome         |                       |                   |                      |                      |                  | Health status    |                      |                  |                  | Long-standing illness |                      |                  |                  | Self-rated health |                      |                  |  |
|---------------------------------|-----------------|-----------------------|-------------------|----------------------|----------------------|------------------|------------------|----------------------|------------------|------------------|-----------------------|----------------------|------------------|------------------|-------------------|----------------------|------------------|--|
|                                 | Cross-sectional |                       | Longitudinal      |                      | Sex                  |                  | Age              |                      | Sex              |                  | Age                   |                      | Sex              |                  | Age               |                      |                  |  |
|                                 | Health status   | Long-standing illness | Self-rated health | Self-rated health t1 | Self-rated health t2 | Stratified (m/f) | Interaction term | Stratified (<65/65+) | Interaction term | Stratified (m/f) | Interaction term      | Stratified (<65/65+) | Interaction term | Stratified (m/f) | Interaction term  | Stratified (<65/65+) | Interaction term |  |
| <b>Sleep</b>                    | ↓               | ↓                     | ↑                 | ↑                    | ↑                    | ↓                | ↓                | ↓                    | ns               | ↓                | ↓                     | ↓                    | ↓                | ↑                | ↑                 | ↑                    | ↑                |  |
| <b>Physical activity</b>        |                 |                       |                   |                      |                      |                  |                  |                      |                  |                  |                       |                      |                  |                  |                   |                      |                  |  |
| Walking                         | ↑               | ↑                     | ↑                 | ↑                    | ↑                    | ↑                | ↑                | ↑                    | ns               | ↑                | ↑                     | ↑                    | ↑                | ↑                | ↑                 | ↑                    | ↑                |  |
| Moderate                        | ↓               | ↓                     | ↑                 | ↓                    | ↓                    | ↓                | ↓                | ↓                    | ns               | ↓                | ↓                     | ↓                    | ↓                | ↑                | ↓                 | ↑                    | ns               |  |
| Vigorous                        | ↑               | ↑                     | ↑                 | ↑                    | ↑                    | ↑                | ↑                | ↑                    | ns               | ↑                | ↑                     | ↑                    | ↑                | ↑                | ↑                 | ↑                    | ↑                |  |
| <b>Stair climbing frequency</b> |                 |                       |                   |                      |                      |                  |                  |                      |                  |                  |                       |                      |                  |                  |                   |                      |                  |  |
| None                            |                 |                       |                   |                      |                      |                  |                  |                      |                  |                  |                       |                      |                  |                  |                   |                      |                  |  |
| 1-5/day                         | ↑               | ↑                     | ↑                 | ↓                    | ↓                    | ↓                | ↓                | ↓                    | ns               | ↑                | ↑                     | ↓                    | ↓                | ↓                | ↓                 | ns                   | ↑                |  |
| 6-10/day                        | ↑               | ↑                     | ↑                 | ↓                    | ↓                    | ↑                | ↑                | ↑                    | ns               | ↑                | ↑                     | ↑                    | ↑                | ↑                | ↑                 | ↑                    | ↑                |  |
| 11-15/day                       | ↑               | ↑                     | ↑                 | ↓                    | ↓                    | ↑                | ↑                | ↑                    | ns               | ↑                | ↑                     | ↑                    | ↑                | ↑                | ↑                 | ↑                    | ns               |  |
| 16-20/day                       | ↑               | ↑                     | ↑                 | ↓                    | ↓                    | ↑                | ↑                | ↑                    | ns               | ↑                | ↑                     | ↑                    | ↑                | ↑                | ↑                 | ↑                    | ns               |  |
| 20+/day                         | ↑               | ↑                     | ↑                 | ↓                    | ↓                    | ↑                | ↑                | ↑                    | ns               | ↑                | ↑                     | ↑                    | ↑                | ↑                | ↑                 | ↑                    | ↑                |  |
| <b>Alcohol intake frequency</b> |                 |                       |                   |                      |                      |                  |                  |                      |                  |                  |                       |                      |                  |                  |                   |                      |                  |  |
| Never                           | ↓               | ↓                     | ↓                 | ↓                    | ↓                    | ↓                | ↓                | ↓                    | ns               | ↓                | ↓                     | ↓                    | ↓                | ↓                | ↓                 | ↓                    | ↓                |  |
| Special                         | ↓               | ↓                     | ↓                 | ↓                    | ↓                    | ↓                | ↓                | ↓                    | ns               | ↓                | ↓                     | ↓                    | ↓                | ↓                | ↓                 | ↓                    | ns               |  |
| 1-3/month                       | ↓               | ↓                     | ↓                 | ↓                    | ↓                    | ↓                | ↓                | ↓                    | ns               | ↓                | ↓                     | ↓                    | ↓                | ↓                | ↓                 | ↓                    | ↑                |  |
| 1-2/week                        |                 |                       |                   |                      |                      |                  |                  |                      |                  |                  |                       |                      |                  |                  |                   |                      |                  |  |
| 3-4/week                        | ↑               | ↑                     | ↑                 | ↓                    | ↓                    | ↑                | ↑                | ↑                    | ns               | ↑                | ↑                     | ↑                    | ↑                | ↑                | ↑                 | ↑                    | ns               |  |
| Daily                           | ↓               | ↓                     | ↓                 | ↓                    | ↓                    | ↓                | ↓                | ↓                    | ns               | ↓                | ↓                     | ↓                    | ↓                | ↓                | ↓                 | ↓                    | ↑                |  |
| <b>BMI</b>                      |                 |                       |                   |                      |                      |                  |                  |                      |                  |                  |                       |                      |                  |                  |                   |                      |                  |  |
| Never                           |                 |                       |                   |                      |                      |                  |                  |                      |                  |                  |                       |                      |                  |                  |                   |                      |                  |  |
| Former                          | ↓               | ↓                     | ↓                 | ↓                    | ↓                    | ↓                | ↓                | ↓                    | ns               | ↓                | ↓                     | ↓                    | ↓                | ↓                | ↓                 | ↓                    | ns               |  |
| Current                         | ↓               | ↓                     | ↓                 | ↓                    | ↓                    | ↓                | ↓                | ↓                    | ns               | ↓                | ↓                     | ↓                    | ↓                | ↓                | ↓                 | ↓                    | ↑                |  |

**Table legend**

|    |                                                               |
|----|---------------------------------------------------------------|
| ↓  | associated with unfavourable health                           |
| ↓  | associated with unfavourable health; stronger in this stratum |
| ↑  | associated with favourable health                             |
| ↑  | associated with favourable health; stronger in this stratum   |
| -- | no evidence of association with health                        |
| ✓✓ | statistically significant – Bonferroni correction             |
| ✓  | statistically significant – Benjamini & Hochberg correction   |
| ns | not statistically significant                                 |

Environmental exposures

| Variable                | Outcome         |                       |                   | Health status |    |                  |                  | Long-standing illness |                  |                  |                  | Self-rated health    |                  |                  |                  |                      |                  |    |    |    |
|-------------------------|-----------------|-----------------------|-------------------|---------------|----|------------------|------------------|-----------------------|------------------|------------------|------------------|----------------------|------------------|------------------|------------------|----------------------|------------------|----|----|----|
|                         | Cross-sectional |                       | Self-rated health | Longitudinal  |    | Sex              |                  | Age                   |                  | Sex              |                  | Age                  |                  | Sex              |                  | Age                  |                  |    |    |    |
|                         | Health status   | Long-standing illness |                   | t1            | t2 | Stratified (m/f) | Interaction term | Stratified (<65/65+)  | Interaction term | Stratified (m/f) | Interaction term | Stratified (<65/65+) | Interaction term | Stratified (m/f) | Interaction term | Stratified (<65/65+) | Interaction term |    |    |    |
| <b>PM<sub>2.5</sub></b> | ↓               | ↓                     | ↑                 | --            | -- | ↓                | --               | ↓                     | --               | ns               | ↓                | --                   | ns               | ↓                | --               | ns                   | ↓                | ↑  | ✓✓ | ✓✓ |
| <b>PM<sub>10</sub></b>  | --              | --                    | --                | --            | -- | --               | --               | --                    | --               | ns               | --               | --                   | ns               | --               | --               | ns                   | --               | -- | ✓  | ns |
| <b>NO<sub>2</sub></b>   | --              | --                    | ↓                 | --            | -- | ↑                | ✓                | --                    | --               | ns               | --               | --                   | ns               | ↓                | ✓                | --                   | --               | -- | ✓  | ✓✓ |
| <b>L<sub>den</sub></b>  | --              | --                    | --                | --            | -- | --               | ns               | ✓                     | --               | ns               | --               | --                   | ns               | --               | ns               | --                   | --               | -- | ✓✓ | ✓✓ |
| <b>Greenspace</b>       | --              | --                    | --                | --            | -- | --               | ns               | ns                    | --               | ns               | --               | --                   | ns               | --               | ns               | --                   | --               | -- | ✓  | ✓  |

Table legend

|    |                                                               |
|----|---------------------------------------------------------------|
| ↓  | associated with unfavourable health                           |
| ↓  | associated with unfavourable health; stronger in this stratum |
| ↑  | associated with favourable health                             |
| ↑  | associated with favourable health; stronger in this stratum   |
| -- | no evidence of association with health                        |
| ✓✓ | statistically significant – Bonferroni correction             |
| ✓  | statistically significant – Benjamini & Hochberg correction   |
| ns | not statistically significant                                 |

Psychosocial factors

| Variable                | Outcome               |                   |                      |                      |                  |                  |                       |                  |                  |                  |                      |                  |                   |                  |                      |                  |   |  |
|-------------------------|-----------------------|-------------------|----------------------|----------------------|------------------|------------------|-----------------------|------------------|------------------|------------------|----------------------|------------------|-------------------|------------------|----------------------|------------------|---|--|
|                         | Health status         |                   |                      |                      |                  |                  | Long-standing illness |                  |                  |                  |                      |                  | Self-rated health |                  |                      |                  |   |  |
|                         | Cross-sectional       |                   | Longitudinal         |                      | Sex              |                  | Age                   |                  | Sex              |                  | Age                  |                  | Sex               |                  | Age                  |                  |   |  |
| Health status           | Long-standing illness | Self-rated health | Self-rated health t1 | Self-rated health t2 | Stratified (m/f) | Interaction term | Stratified (<65/65+)  | Interaction term | Stratified (m/f) | Interaction term | Stratified (<65/65+) | Interaction term | Stratified (m/f)  | Interaction term | Stratified (<65/65+) | Interaction term |   |  |
| <b>Loneliness</b>       |                       |                   |                      |                      |                  |                  |                       |                  |                  |                  |                      |                  |                   |                  |                      |                  |   |  |
| Not lonely              |                       |                   |                      |                      |                  |                  |                       |                  |                  |                  |                      |                  |                   |                  |                      |                  |   |  |
| Lonely                  | ↓                     | ↓                 | ↓                    | ↓                    | ↓                | ↓                | ↓                     | ↓                | ↓                | ↓                | ↓                    | ↓                | ↓                 | ↓                | ns                   | ↓                | ↓ |  |
| <b>Social isolation</b> |                       |                   |                      |                      |                  |                  |                       |                  |                  |                  |                      |                  |                   |                  |                      |                  |   |  |
| Not isolated            |                       |                   |                      |                      |                  |                  |                       |                  |                  |                  |                      |                  |                   |                  |                      |                  |   |  |
| Isolated                | ↓                     | ↓                 | ↓                    | ↓                    | ↓                | ↓                | ↓                     | ↓                | ↓                | ↓                | ↓                    | ↓                | ↓                 | ↓                | ns                   | ↓                | ↓ |  |

Table legend

|    |                                                               |
|----|---------------------------------------------------------------|
| ↓  | associated with unfavourable health                           |
| ↓  | associated with unfavourable health; stronger in this stratum |
| ↑  | associated with favourable health                             |
| ↑  | associated with favourable health; stronger in this stratum   |
| -- | no evidence of association with health                        |
| ✓✓ | statistically significant – Bonferroni correction             |
| ✓  | statistically significant – Benjamini & Hochberg correction   |
| ns | not statistically significant                                 |

Sociodemographic characteristics

| Variable                     | Outcome         |                       |                   | Health status        |                      |                  |                  | Long-standing illness |                  |                  |                  | Self-rated health    |                  |                  |                  |   |
|------------------------------|-----------------|-----------------------|-------------------|----------------------|----------------------|------------------|------------------|-----------------------|------------------|------------------|------------------|----------------------|------------------|------------------|------------------|---|
|                              | Cross-sectional |                       | Longitudinal      | Sex                  |                      | Age              |                  | Sex                   |                  | Age              |                  | Sex                  |                  | Age              |                  |   |
|                              | Health status   | Long-standing illness | Self-rated health | Self-rated health t1 | Self-rated health t2 | Stratified (m/f) | Interaction term | Stratified (<65/65+)  | Interaction term | Stratified (m/f) | Interaction term | Stratified (<65/65+) | Interaction term | Stratified (m/f) | Interaction term |   |
| <b>Household income</b>      |                 |                       |                   |                      |                      |                  |                  |                       |                  |                  |                  |                      |                  |                  |                  |   |
| Very low                     | ↓               | ↓                     | ↓                 | ↓                    | ↓                    | ↓                | ↓                | ↓                     | ↓                | ↓                | ↓                | ↓                    | ↓                | ↓                | ↓                | ↓ |
| Low                          | ↓               | ↓                     | ↓                 | ↓                    | ↓                    | ↓                | ↓                | ↓                     | ↓                | ↓                | ↓                | ↓                    | ↓                | ↓                | ↓                | ↓ |
| Middle                       |                 |                       |                   |                      |                      |                  |                  |                       |                  |                  |                  |                      |                  |                  |                  |   |
| High                         | ↑               | ↑                     | ↑                 | ↑                    | ↑                    | ↑                | ↑                | ↑                     | ↑                | ↑                | ↑                | ↑                    | ↑                | ↑                | ↑                | ↑ |
| Very high                    | ↑               | ↑                     | ↑                 | ↑                    | ↑                    | ↑                | ↑                | ↑                     | ↑                | ↑                | ↑                | ↑                    | ↑                | ↑                | ↑                | ↑ |
| <b>Sex</b>                   |                 |                       |                   |                      |                      |                  |                  |                       |                  |                  |                  |                      |                  |                  |                  |   |
| Female                       |                 |                       |                   |                      |                      |                  |                  |                       |                  |                  |                  |                      |                  |                  |                  |   |
| Male                         | ↓               | ↓                     | ↓                 | ↓                    | ↓                    | ↓                | ↓                | ↓                     | ↓                | ↓                | ↓                | ↓                    | ↓                | ↓                | ↓                | ↓ |
| <b>Age</b>                   |                 |                       |                   |                      |                      |                  |                  |                       |                  |                  |                  |                      |                  |                  |                  |   |
| Deprivation                  | ↓               | ↓                     | ↓                 | ↓                    | ↓                    | ↓                | ↓                | ↓                     | ↓                | ↓                | ↓                | ↓                    | ↓                | ↓                | ↓                | ↓ |
| <b>Ethnicity</b>             |                 |                       |                   |                      |                      |                  |                  |                       |                  |                  |                  |                      |                  |                  |                  |   |
| White                        |                 |                       |                   |                      |                      |                  |                  |                       |                  |                  |                  |                      |                  |                  |                  |   |
| Mixed-race                   | ↓               | ↓                     | ↓                 | ↓                    | ↓                    | ↓                | ↓                | ↓                     | ↓                | ↓                | ↓                | ↓                    | ↓                | ↓                | ↓                | ↓ |
| Asian                        | ↑               | ↑                     | ↑                 | ↑                    | ↑                    | ↑                | ↑                | ↑                     | ↑                | ↑                | ↑                | ↑                    | ↑                | ↑                | ↑                | ↑ |
| Black                        | ↑               | ↑                     | ↑                 | ↑                    | ↑                    | ↑                | ↑                | ↑                     | ↑                | ↑                | ↑                | ↑                    | ↑                | ↑                | ↑                | ↑ |
| Chinese                      | ↑               | ↑                     | ↑                 | ↑                    | ↑                    | ↑                | ↑                | ↑                     | ↑                | ↑                | ↑                | ↑                    | ↑                | ↑                | ↑                | ↑ |
| Other                        | ↑               | ↑                     | ↑                 | ↑                    | ↑                    | ↑                | ↑                | ↑                     | ↑                | ↑                | ↑                | ↑                    | ↑                | ↑                | ↑                | ↑ |
| <b>Highest qualification</b> |                 |                       |                   |                      |                      |                  |                  |                       |                  |                  |                  |                      |                  |                  |                  |   |
| None                         |                 |                       |                   |                      |                      |                  |                  |                       |                  |                  |                  |                      |                  |                  |                  |   |
| GCSEs                        | ↓               | ↓                     | ↓                 | ↓                    | ↓                    | ↓                | ↓                | ↓                     | ↓                | ↓                | ↓                | ↓                    | ↓                | ↓                | ↓                | ↓ |
| A levels                     | ↓               | ↓                     | ↓                 | ↓                    | ↓                    | ↓                | ↓                | ↓                     | ↓                | ↓                | ↓                | ↓                    | ↓                | ↓                | ↓                | ↓ |
| Degree                       | ↓               | ↓                     | ↓                 | ↓                    | ↓                    | ↓                | ↓                | ↓                     | ↓                | ↓                | ↓                | ↓                    | ↓                | ↓                | ↓                | ↓ |

**Table legend**

|    |                                                               |
|----|---------------------------------------------------------------|
| ↓  | associated with unfavourable health                           |
| ↓  | associated with unfavourable health; stronger in this stratum |
| ↑  | associated with favourable health                             |
| ↑  | associated with favourable health; stronger in this stratum   |
| -- | no evidence of association with health                        |
| ✓✓ | statistically significant – Bonferroni correction             |
| ✓  | statistically significant – Benjamini & Hochberg correction   |
| ns | not statistically significant                                 |

**Tables S10-S13. Regression tables long-standing illness**

Sociodemographic characteristics

| Table S10. Sociodemographic characteristics associated with long-standing illness |         |                         |        |         |                         |        |         |                         |        |         |                         |        |
|-----------------------------------------------------------------------------------|---------|-------------------------|--------|---------|-------------------------|--------|---------|-------------------------|--------|---------|-------------------------|--------|
| Term                                                                              | Model 1 |                         |        | Model 2 |                         |        | Model 3 |                         |        | Model 4 |                         |        |
|                                                                                   | OR      | Bonferroni-corrected CI |        | OR      | Bonferroni-corrected CI |        | OR      | Bonferroni-corrected CI |        | OR      | Bonferroni-corrected CI |        |
| <b>Household income<sup>1</sup></b>                                               |         |                         |        |         |                         |        |         |                         |        |         |                         |        |
| Very low                                                                          | 0.4914  | 0.4739                  | 0.5094 | 0.5362  | 0.5166                  | 0.5565 | 0.5965  | 0.5734                  | 0.6206 | 0.6654  | 0.6384                  | 0.6934 |
| Low                                                                               | 0.7785  | 0.7515                  | 0.8064 | 0.8323  | 0.8029                  | 0.8628 | 0.8638  | 0.8329                  | 0.8957 | 0.8906  | 0.8581                  | 0.9244 |
| Middle                                                                            | Ref     | –                       | –      | Ref     | –                       | –      | Ref     | –                       | –      | Ref     | –                       | –      |
| High                                                                              | 1.2410  | 1.1936                  | 1.2903 | 1.1933  | 1.1473                  | 1.2412 | 1.1542  | 1.1091                  | 1.2011 | 1.1171  | 1.0726                  | 1.1634 |
| Very high                                                                         | 1.5004  | 1.4059                  | 1.6021 | 1.4327  | 1.3419                  | 1.5305 | 1.3720  | 1.2837                  | 1.4671 | 1.2524  | 1.1703                  | 1.3410 |
| <b>Sex</b>                                                                        |         |                         |        |         |                         |        |         |                         |        |         |                         |        |
| Female                                                                            | Ref     | –                       | –      | Ref     | –                       | –      | Ref     | –                       | –      | Ref     | –                       | –      |
| Male                                                                              | 0.7788  | 0.7594                  | 0.7987 | –       | –                       | –      | 0.7679  | 0.7482                  | 0.7882 | 0.7585  | 0.7380                  | 0.7797 |
| <b>Age</b>                                                                        | 0.9644  | 0.9629                  | 0.9660 | –       | –                       | –      | 0.9732  | 0.9715                  | 0.9750 | 0.9730  | 0.9711                  | 0.9748 |
| <b>Multiple deprivation</b>                                                       | 0.9845  | 0.9836                  | 0.9854 | 0.9827  | 0.9818                  | 0.9836 | 0.9881  | 0.9871                  | 0.9891 | 0.9921  | 0.9910                  | 0.9932 |
| <b>Ethnicity</b>                                                                  |         |                         |        |         |                         |        |         |                         |        |         |                         |        |
| White                                                                             | Ref     | –                       | –      | Ref     | –                       | –      | Ref     | –                       | –      | Ref     | –                       | –      |
| Mixed-race                                                                        | 1.1530  | 0.9729                  | 1.3724 | 0.9368  | 0.7890                  | 1.1172 | 1.0420  | 0.8755                  | 1.2453 | 1.1223  | 0.9387                  | 1.3474 |
| Asian                                                                             | 1.0218  | 0.9227                  | 1.1331 | 0.9252  | 0.8343                  | 1.0273 | 1.0452  | 0.9412                  | 1.1622 | 1.2225  | 1.0962                  | 1.3652 |
| Black                                                                             | 0.8780  | 0.7906                  | 0.9763 | 0.7200  | 0.6474                  | 0.8017 | 0.9670  | 0.8676                  | 1.0791 | 1.1852  | 1.0591                  | 1.3277 |
| Chinese                                                                           | 1.7641  | 1.3404                  | 2.3591 | 1.5038  | 1.1401                  | 2.0150 | 1.5964  | 1.2071                  | 2.1443 | 1.6205  | 1.2207                  | 2.1842 |
| Other                                                                             | 0.9554  | 0.8252                  | 1.1091 | 0.8340  | 0.7191                  | 0.9697 | 0.9925  | 0.8539                  | 1.1565 | 1.2027  | 1.0301                  | 1.4078 |
| <b>Highest qualification</b>                                                      |         |                         |        |         |                         |        |         |                         |        |         |                         |        |
| None                                                                              | Ref     | –                       | –      | Ref     | –                       | –      | Ref     | –                       | –      | Ref     | –                       | –      |
| O levels/GCSEs/CSEs                                                               | 1.5515  | 1.4891                  | 1.6165 | 1.2693  | 1.2166                  | 1.3241 | 1.0412  | 0.9965                  | 1.0878 | 0.9920  | 0.9485                  | 1.0375 |
| A levels/NVQ/HND/HNC <sup>2</sup>                                                 | 1.3935  | 1.3364                  | 1.4531 | 1.2067  | 1.1562                  | 1.2594 | 0.9484  | 0.9070                  | 0.9915 | 0.8953  | 0.8554                  | 0.9371 |
| Degree                                                                            | 1.7157  | 1.6492                  | 1.7849 | 1.4204  | 1.3635                  | 1.4796 | 0.9827  | 0.9401                  | 1.0272 | 0.8550  | 0.8167                  | 0.8950 |

*Note:* Bonferroni-adjusted (~99.9%) confidence intervals. OR = odds ratio; CI = confidence interval; GCSEs = general certificate of secondary education; CSE = certificate of secondary education; NVQ = national vocational qualification; HND = higher national diploma; HNC = higher national certificate. <sup>1</sup>Annual household income groups: very low (<£18,000), low (£18,000–£30,999), middle (£31,000–£51,999), high (£52,000–£100,000) and very high (>£100,000). <sup>2</sup>also includes 'other professional qualifications'.

Model 1 – only individual explanatory variables.

Model 2 – adjusted for age and sex.

Model 3 – age, sex and all sociodemographic characteristics.

Model 4 – all explanatory variables.

Psychosocial factors

| Table S11. Psychosocial factors associated with long-standing illness |         |                         |        |         |                         |        |         |                         |        |         |                         |        |
|-----------------------------------------------------------------------|---------|-------------------------|--------|---------|-------------------------|--------|---------|-------------------------|--------|---------|-------------------------|--------|
| Term                                                                  | Model 1 |                         |        | Model 2 |                         |        | Model 3 |                         |        | Model 4 |                         |        |
|                                                                       | OR      | Bonferroni-corrected CI |        | OR      | Bonferroni-corrected CI |        | OR      | Bonferroni-corrected CI |        | OR      | Bonferroni-corrected CI |        |
| <b>Loneliness</b>                                                     |         |                         |        |         |                         |        |         |                         |        |         |                         |        |
| Not lonely                                                            | Ref     | –                       | –      | Ref     | –                       | –      | Ref     | –                       | –      | Ref     | –                       | –      |
| Lonely                                                                | 0.5828  | 0.5539                  | 0.6134 | 0.5658  | 0.5373                  | 0.5958 | 0.5970  | 0.5667                  | 0.6290 | 0.7097  | 0.6722                  | 0.7494 |
| <b>Social isolation</b>                                               |         |                         |        |         |                         |        |         |                         |        |         |                         |        |
| Not isolated                                                          | Ref     | –                       | –      | Ref     | –                       | –      | Ref     | –                       | –      | Ref     | –                       | –      |
| Isolated                                                              | 0.6542  | 0.6269                  | 0.6828 | 0.6558  | 0.6281                  | 0.6847 | 0.6906  | 0.6611                  | 0.7214 | 0.9185  | 0.8770                  | 0.9621 |

*Note:* Bonferroni-adjusted (~99.9%) confidence intervals. OR = odds ratio; CI = confidence interval.

Model 1 – only individual explanatory variables.

Model 2 – adjusted for age and sex.

Model 3 – age, sex and all psychosocial factors.

Model 4 – all explanatory variables.

Lifestyle factors

| Table S12. Lifestyle factors associated with long-standing illness |         |                         |        |         |                         |        |         |                         |        |         |                         |        |
|--------------------------------------------------------------------|---------|-------------------------|--------|---------|-------------------------|--------|---------|-------------------------|--------|---------|-------------------------|--------|
| Term                                                               | Model 1 |                         |        | Model 2 |                         |        | Model 3 |                         |        | Model 4 |                         |        |
|                                                                    | OR      | Bonferroni-corrected CI |        | OR      | Bonferroni-corrected CI |        | OR      | Bonferroni-corrected CI |        | OR      | Bonferroni-corrected CI |        |
| <b>Sleep duration</b> (hours/day)                                  | 0.9984  | 0.9866                  | 1.0104 | 1.0142  | 1.0020                  | 1.0265 | 1.0014  | 0.9893                  | 1.0137 | 1.0004  | 0.9882                  | 1.0128 |
| <b>Physical activity</b> (days/week) <sup>1</sup>                  |         |                         |        |         |                         |        |         |                         |        |         |                         |        |
| Walking                                                            | 1.0408  | 1.0341                  | 1.0475 | 1.0505  | 1.0437                  | 1.0573 | 1.0179  | 1.0106                  | 1.0252 | 1.0250  | 1.0175                  | 1.0325 |
| Moderate activity                                                  | 1.0319  | 1.0263                  | 1.0376 | 1.0428  | 1.0370                  | 1.0486 | 0.9927  | 0.9859                  | 0.9994 | 0.9984  | 0.9916                  | 1.0053 |
| Vigorous activity                                                  | 1.0917  | 1.0844                  | 1.0991 | 1.0918  | 1.0844                  | 1.0993 | 1.0688  | 1.0604                  | 1.0774 | 1.0641  | 1.0557                  | 1.0727 |
| <b>Stair climbing frequency</b>                                    |         |                         |        |         |                         |        |         |                         |        |         |                         |        |
| None                                                               | Ref     | –                       | –      | Ref     | –                       | –      | Ref     | –                       | –      | Ref     | –                       | –      |
| 1-5/day                                                            | 1.2582  | 1.1962                  | 1.3235 | 1.1326  | 1.0759                  | 1.1923 | 1.1579  | 1.0984                  | 1.2206 | 1.1101  | 1.0522                  | 1.1710 |
| 6-10/day                                                           | 1.6877  | 1.6100                  | 1.7690 | 1.5338  | 1.4623                  | 1.6086 | 1.4045  | 1.3373                  | 1.4750 | 1.2937  | 1.2307                  | 1.3598 |
| 11-15/day                                                          | 1.8530  | 1.7600                  | 1.9508 | 1.6718  | 1.5868                  | 1.7612 | 1.4361  | 1.3612                  | 1.5151 | 1.3131  | 1.2434                  | 1.3866 |
| 16-20/day                                                          | 1.9066  | 1.7941                  | 2.0263 | 1.7183  | 1.6159                  | 1.8275 | 1.4280  | 1.3406                  | 1.5211 | 1.3066  | 1.2255                  | 1.3932 |
| 20+/day                                                            | 1.9605  | 1.8360                  | 2.0939 | 1.7164  | 1.6061                  | 1.8347 | 1.4113  | 1.3181                  | 1.5113 | 1.2975  | 1.2108                  | 1.3907 |
| <b>Alcohol intake frequency</b>                                    |         |                         |        |         |                         |        |         |                         |        |         |                         |        |
| Never                                                              | 0.4952  | 0.4701                  | 0.5216 | 0.4959  | 0.4704                  | 0.5227 | 0.5097  | 0.4829                  | 0.5379 | 0.5533  | 0.5234                  | 0.5850 |
| Special occasions                                                  | 0.6305  | 0.6028                  | 0.6596 | 0.6119  | 0.5844                  | 0.6406 | 0.6623  | 0.6319                  | 0.6941 | 0.7142  | 0.6809                  | 0.7492 |
| 1-3/month                                                          | 0.8239  | 0.7876                  | 0.8620 | 0.7846  | 0.7495                  | 0.8213 | 0.8197  | 0.7824                  | 0.8589 | 0.8486  | 0.8096                  | 0.8895 |
| 1-2/week                                                           | Ref     | –                       | –      | Ref     | –                       | –      | Ref     | –                       | –      | Ref     | –                       | –      |
| 3-4/week                                                           | 1.1360  | 1.0949                  | 1.1786 | 1.1808  | 1.1376                  | 1.2257 | 1.1387  | 1.0963                  | 1.1828 | 1.0925  | 1.0514                  | 1.1353 |
| Daily/almost daily                                                 | 1.0289  | 0.9911                  | 1.0682 | 1.1540  | 1.1108                  | 1.1989 | 1.1374  | 1.0939                  | 1.1828 | 1.0744  | 1.0326                  | 1.1180 |
| <b>BMI</b> (kg/m <sup>2</sup> )                                    | 0.9259  | 0.9234                  | 0.9284 | 0.9276  | 0.9250                  | 0.9301 | 0.9387  | 0.9361                  | 0.9414 | 0.9419  | 0.9392                  | 0.9446 |
| <b>Smoking status</b>                                              |         |                         |        |         |                         |        |         |                         |        |         |                         |        |
| Never                                                              | Ref     | –                       | –      | Ref     | –                       | –      | Ref     | –                       | –      | Ref     | –                       | –      |
| Former                                                             | 0.7181  | 0.6989                  | 0.7378 | 0.7898  | 0.7683                  | 0.8119 | 0.7761  | 0.7542                  | 0.7987 | 0.7978  | 0.7749                  | 0.8213 |
| Current                                                            | 0.7016  | 0.6723                  | 0.7322 | 0.6864  | 0.6574                  | 0.7168 | 0.6888  | 0.6588                  | 0.7202 | 0.7858  | 0.7506                  | 0.8227 |

Note: Bonferroni-adjusted (~99.9%) confidence intervals. OR = odds ratio; CI = confidence interval; BMI = body mass index. <sup>1</sup>number of days per week engaging in these activities for 10+ minutes continuously.

Model 1 – only individual explanatory variables.

Model 2 – adjusted for age and sex.

Model 3 – age, sex and all lifestyle factors.

Model 4 – all explanatory variables.



Environmental exposures

| Table S13. Environmental exposures associated with long-standing illness |         |                         |         |                         |         |                         |         |                         |        |                         |        |                         |
|--------------------------------------------------------------------------|---------|-------------------------|---------|-------------------------|---------|-------------------------|---------|-------------------------|--------|-------------------------|--------|-------------------------|
| Term                                                                     | Model 1 |                         | Model 2 |                         | Model 3 |                         | Model 4 |                         |        |                         |        |                         |
|                                                                          | OR      | Bonferroni-corrected CI | OR      | Bonferroni-corrected CI | OR      | Bonferroni-corrected CI | OR      | Bonferroni-corrected CI | OR     | Bonferroni-corrected CI | OR     | Bonferroni-corrected CI |
| <b>PM<sub>2.5</sub></b>                                                  | 0.9254  | 0.9144                  | 0.9367  | 0.9065                  | 0.8955  | 0.9176                  | 0.8969  | 0.8749                  | 0.9194 | 0.9677                  | 0.9430 | 0.9932                  |
| <b>PM<sub>10</sub></b>                                                   | 0.9814  | 0.9748                  | 0.9880  | 0.9762                  | 0.9696  | 0.9828                  | 1.0053  | 0.9970                  | 1.0136 | 1.0019                  | 0.9934 | 1.0105                  |
| <b>NO<sub>2</sub></b>                                                    | 0.9917  | 0.9901                  | 0.9933  | 0.9887                  | 0.9870  | 0.9904                  | 0.9971  | 0.9930                  | 1.0011 | 1.0025                  | 0.9982 | 1.0068                  |
| <b>L<sub>den</sub></b>                                                   | 0.9971  | 0.9942                  | 1.0001  | 0.9958                  | 0.9928  | 0.9988                  | 1.0049  | 1.0013                  | 1.0084 | 1.0015                  | 0.9979 | 1.0052                  |
| <b>Greenspace 1000m</b>                                                  | 1.0017  | 1.0011                  | 1.0022  | 1.0026                  | 1.0020  | 1.0032                  | 0.9986  | 0.9977                  | 0.9996 | 0.9997                  | 0.9987 | 1.0007                  |

*Note:* Bonferroni-adjusted (~99.9%) confidence intervals. OR = odds ratio; CI = confidence interval; PM = particulate matter; NO<sub>2</sub> = nitrogen dioxide; L<sub>den</sub> = day-evening-night noise level.

Model 1 – only individual explanatory variables.

Model 2 – adjusted for age and sex.

Model 3 – age, sex and all environmental exposures.

Model 4 – all explanatory variables.

**Tables S14-S17. Regression tables self-rated health**

Sociodemographic characteristics

| Table S14. Sociodemographic characteristics associated with self-rated health |         |                         |        |         |                         |        |         |                         |        |         |                         |        |
|-------------------------------------------------------------------------------|---------|-------------------------|--------|---------|-------------------------|--------|---------|-------------------------|--------|---------|-------------------------|--------|
| Term                                                                          | Model 1 |                         |        | Model 2 |                         |        | Model 3 |                         |        | Model 4 |                         |        |
|                                                                               | OR      | Bonferroni-corrected CI |        | OR      | Bonferroni-corrected CI |        | OR      | Bonferroni-corrected CI |        | OR      | Bonferroni-corrected CI |        |
| <b>Household income<sup>1</sup></b>                                           |         |                         |        |         |                         |        |         |                         |        |         |                         |        |
| Very low                                                                      | 0.4830  | 0.4670                  | 0.4997 | 0.4399  | 0.4248                  | 0.4555 | 0.5696  | 0.5490                  | 0.5909 | 0.6192  | 0.5960                  | 0.6432 |
| Low                                                                           | 0.8127  | 0.7873                  | 0.8389 | 0.7668  | 0.7425                  | 0.7919 | 0.8472  | 0.8201                  | 0.8753 | 0.8512  | 0.8234                  | 0.8799 |
| Middle                                                                        | Ref     | –                       | –      | Ref     | –                       | –      | Ref     | –                       | –      | Ref     | –                       | –      |
| High                                                                          | 1.3055  | 1.2628                  | 1.3497 | 1.3572  | 1.3125                  | 1.4034 | 1.2288  | 1.1877                  | 1.2712 | 1.2102  | 1.1691                  | 1.2526 |
| Very high                                                                     | 1.9695  | 1.8690                  | 2.0754 | 2.0726  | 1.9663                  | 2.1846 | 1.7670  | 1.6748                  | 1.8644 | 1.6364  | 1.5491                  | 1.7286 |
| <b>Sex</b>                                                                    |         |                         |        |         |                         |        |         |                         |        |         |                         |        |
| Female                                                                        | Ref     | –                       | –      | Ref     | –                       | –      | Ref     | –                       | –      | Ref     | –                       | –      |
| Male                                                                          | 0.8049  | 0.7867                  | 0.8236 | –       | –                       | –      | 0.7601  | 0.7426                  | 0.7780 | 0.7836  | 0.7648                  | 0.8030 |
| <b>Age</b>                                                                    |         |                         |        |         |                         |        |         |                         |        |         |                         |        |
|                                                                               | 0.9954  | 0.9940                  | 0.9968 | –       | –                       | –      | 1.0100  | 1.0084                  | 1.0116 | 1.0113  | 1.0097                  | 1.0130 |
| <b>Multiple deprivation</b>                                                   |         |                         |        |         |                         |        |         |                         |        |         |                         |        |
|                                                                               | 0.9771  | 0.9762                  | 0.9779 | 0.9768  | 0.9760                  | 0.9777 | 0.9859  | 0.9850                  | 0.9868 | 0.9923  | 0.9913                  | 0.9933 |
| <b>Ethnicity</b>                                                              |         |                         |        |         |                         |        |         |                         |        |         |                         |        |
| White                                                                         | Ref     | –                       | –      | Ref     | –                       | –      | Ref     | –                       | –      | Ref     | –                       | –      |
| Mixed-race                                                                    | 0.8044  | 0.6916                  | 0.9360 | 0.7644  | 0.6570                  | 0.8898 | 0.8341  | 0.7162                  | 0.9718 | 0.9019  | 0.7729                  | 1.0527 |
| Asian                                                                         | 0.5267  | 0.4811                  | 0.5768 | 0.5270  | 0.4813                  | 0.5773 | 0.5714  | 0.5212                  | 0.6266 | 0.5995  | 0.5445                  | 0.6602 |
| Black                                                                         | 0.6258  | 0.5683                  | 0.6893 | 0.6025  | 0.5469                  | 0.6639 | 0.8382  | 0.7595                  | 0.9253 | 1.0896  | 0.9839                  | 1.2069 |
| Chinese                                                                       | 0.8293  | 0.6673                  | 1.0318 | 0.7950  | 0.6396                  | 0.9894 | 0.7954  | 0.6386                  | 0.9915 | 0.6783  | 0.5413                  | 0.8506 |
| Other                                                                         | 0.6770  | 0.5922                  | 0.7745 | 0.6604  | 0.5774                  | 0.7557 | 0.7479  | 0.6529                  | 0.8570 | 0.8903  | 0.7746                  | 1.0235 |
| <b>Highest qualification</b>                                                  |         |                         |        |         |                         |        |         |                         |        |         |                         |        |
| None                                                                          | Ref     | –                       | –      | Ref     | –                       | –      | Ref     | –                       | –      | Ref     | –                       | –      |
| O levels/GCSEs/CSEs                                                           | 1.5682  | 1.5094                  | 1.6292 | 1.5801  | 1.5193                  | 1.6434 | 1.2710  | 1.2208                  | 1.3232 | 1.2420  | 1.1920                  | 1.2941 |
| A levels/NVQ/HND/HNC <sup>2</sup>                                             | 1.7160  | 1.6499                  | 1.7849 | 1.7435  | 1.6753                  | 1.8146 | 1.3336  | 1.2797                  | 1.3896 | 1.2876  | 1.2345                  | 1.3429 |
| Degree                                                                        | 2.5396  | 2.4468                  | 2.6360 | 2.5944  | 2.4968                  | 2.6958 | 1.7178  | 1.6490                  | 1.7895 | 1.5031  | 1.4412                  | 1.5676 |

*Note:* Bonferroni-adjusted (~99.9%) confidence intervals. OR = odds ratio; CI = confidence interval; GCSEs = general certificate of secondary education; CSE = certificate of secondary education; NVQ = national vocational qualification; HND = higher national diploma; HNC = higher national certificate. For categorical explanatory variables the odds ratios indicate the changes in odds of reporting better self-rated health associated with the explanatory variable group relative to the reference group. Odds ratios for continuous explanatory variables indicate proportional odds ratios for a 1-unit increase in the explanatory variable on level of self-rated health. <sup>1</sup>Annual household income groups: very low (<£18,000), low (£18,000–£30,999), middle (£31,000–£51,999), high (£52,000–£100,000) and very high (>£100,000). <sup>2</sup>also includes 'other professional qualifications'.

Model 1 – only individual explanatory variables.

Model 2 – adjusted for age and sex.

Model 3 – age, sex and all sociodemographic characteristics.

Model 4 – all explanatory variables.

Psychosocial factors

| Table S15. Psychosocial factors associated with self-rated health |         |                         |        |         |                         |        |         |                         |        |         |                         |        |
|-------------------------------------------------------------------|---------|-------------------------|--------|---------|-------------------------|--------|---------|-------------------------|--------|---------|-------------------------|--------|
| Term                                                              | Model 1 |                         |        | Model 2 |                         |        | Model 3 |                         |        | Model 4 |                         |        |
|                                                                   | OR      | Bonferroni-corrected CI |        | OR      | Bonferroni-corrected CI |        | OR      | Bonferroni-corrected CI |        | OR      | Bonferroni-corrected CI |        |
| <b>Loneliness</b>                                                 |         |                         |        |         |                         |        |         |                         |        |         |                         |        |
| Not lonely                                                        | Ref     | –                       | –      | Ref     | –                       | –      | Ref     | –                       | –      | Ref     | –                       | –      |
| Lonely                                                            | 0.3590  | 0.3419                  | 0.3769 | 0.3589  | 0.3419                  | 0.3769 | 0.3860  | 0.3675                  | 0.4055 | 0.4921  | 0.4678                  | 0.5176 |
| <b>Social isolation</b>                                           |         |                         |        |         |                         |        |         |                         |        |         |                         |        |
| Not isolated                                                      | Ref     | –                       | –      | Ref     | –                       | –      | Ref     | –                       | –      | Ref     | –                       | –      |
| Isolated                                                          | 0.5374  | 0.5159                  | 0.5598 | 0.5394  | 0.5178                  | 0.5619 | 0.5905  | 0.5667                  | 0.6153 | 0.8593  | 0.8233                  | 0.8970 |

*Note:* Bonferroni-adjusted (~99.9%) confidence intervals. OR = odds ratio; CI = confidence interval. For categorical explanatory variables the odds ratios indicate the changes in odds of reporting better self-rated health associated with the explanatory variable group relative to the reference group.

Model 1 – only individual explanatory variables.

Model 2 – adjusted for age and sex.

Model 3 – age, sex and all psychosocial factors.

Model 4 – all explanatory variables.

| Table S16. Lifestyle factors associated with self-rated health |         |                         |        |         |                         |        |         |                         |        |         |                         |        |
|----------------------------------------------------------------|---------|-------------------------|--------|---------|-------------------------|--------|---------|-------------------------|--------|---------|-------------------------|--------|
| Term                                                           | Model 1 |                         |        | Model 2 |                         |        | Model 3 |                         |        | Model 4 |                         |        |
|                                                                | OR      | Bonferroni-corrected CI |        | OR      | Bonferroni-corrected CI |        | OR      | Bonferroni-corrected CI |        | OR      | Bonferroni-corrected CI |        |
| <b>Sleep duration</b> (hours/day)                              | 1.0959  | 1.0836                  | 1.1082 | 1.0958  | 1.0836                  | 1.1082 | 1.0781  | 1.0660                  | 1.0903 | 1.0730  | 1.0609                  | 1.0852 |
| <b>Physical activity</b> (days/week) <sup>1</sup>              |         |                         |        |         |                         |        |         |                         |        |         |                         |        |
| Walking                                                        | 1.1044  | 1.0979                  | 1.1110 | 1.1044  | 1.0978                  | 1.1110 | 1.0394  | 1.0326                  | 1.0461 | 1.0522  | 1.0454                  | 1.0591 |
| Moderate activity                                              | 1.1009  | 1.0954                  | 1.1064 | 1.1029  | 1.0974                  | 1.1085 | 1.0010  | 0.9949                  | 1.0071 | 1.0132  | 1.0070                  | 1.0195 |
| Vigorous activity                                              | 1.2033  | 1.1960                  | 1.2106 | 1.2126  | 1.2052                  | 1.2200 | 1.1715  | 1.1632                  | 1.1799 | 1.1668  | 1.1585                  | 1.1751 |
| <b>Stair climbing frequency</b>                                |         |                         |        |         |                         |        |         |                         |        |         |                         |        |
| None                                                           | Ref     | –                       | –      | Ref     | –                       | –      | Ref     | –                       | –      | Ref     | –                       | –      |
| 1-5/day                                                        | 1.0734  | 1.0225                  | 1.1269 | 1.0717  | 1.0205                  | 1.1254 | 1.1313  | 1.0766                  | 1.1888 | 1.0533  | 1.0019                  | 1.1074 |
| 6-10/day                                                       | 1.5855  | 1.5157                  | 1.6586 | 1.5775  | 1.5077                  | 1.6506 | 1.4181  | 1.3544                  | 1.4848 | 1.2293  | 1.1733                  | 1.2878 |
| 11-15/day                                                      | 1.8892  | 1.7997                  | 1.9831 | 1.8694  | 1.7804                  | 1.9628 | 1.5192  | 1.4457                  | 1.5964 | 1.2892  | 1.2260                  | 1.3557 |
| 16-20/day                                                      | 2.0255  | 1.9150                  | 2.1424 | 1.9988  | 1.8893                  | 2.1146 | 1.5394  | 1.4537                  | 1.6302 | 1.2991  | 1.2258                  | 1.3767 |
| 20+/day                                                        | 2.1944  | 2.0663                  | 2.3305 | 2.1546  | 2.0282                  | 2.2889 | 1.5905  | 1.4955                  | 1.6915 | 1.3652  | 1.2828                  | 1.4529 |
| <b>Alcohol intake frequency</b>                                |         |                         |        |         |                         |        |         |                         |        |         |                         |        |
| Never                                                          | 0.5340  | 0.5078                  | 0.5615 | 0.5201  | 0.4945                  | 0.5470 | 0.5463  | 0.5190                  | 0.5750 | 0.6624  | 0.6285                  | 0.6981 |
| Special occasions                                              | 0.6048  | 0.5799                  | 0.6309 | 0.5743  | 0.5504                  | 0.5992 | 0.6556  | 0.6279                  | 0.6845 | 0.7565  | 0.7240                  | 0.7904 |
| 1-3/month                                                      | 0.8268  | 0.7934                  | 0.8616 | 0.8007  | 0.7683                  | 0.8345 | 0.8699  | 0.8343                  | 0.9070 | 0.9201  | 0.8821                  | 0.9597 |
| 1-2/week                                                       | Ref     | –                       | –      | Ref     | –                       | –      | Ref     | –                       | –      | Ref     | –                       | –      |
| 3-4/week                                                       | 1.2045  | 1.1663                  | 1.2441 | 1.2297  | 1.1906                  | 1.2701 | 1.1591  | 1.1217                  | 1.1978 | 1.0520  | 1.0178                  | 1.0875 |
| Daily/almost daily                                             | 1.1495  | 1.1119                  | 1.1884 | 1.2013  | 1.1617                  | 1.2423 | 1.1793  | 1.1395                  | 1.2204 | 1.0264  | 0.9913                  | 1.0628 |
| <b>BMI</b> (kg/m <sup>2</sup> )                                | 0.8850  | 0.8827                  | 0.8873 | 0.8860  | 0.8838                  | 0.8883 | 0.8994  | 0.8970                  | 0.9018 | 0.9045  | 0.9020                  | 0.9069 |
| <b>Smoking status</b>                                          |         |                         |        |         |                         |        |         |                         |        |         |                         |        |
| Never                                                          | Ref     | –                       | –      | Ref     | –                       | –      | Ref     | –                       | –      | Ref     | –                       | –      |
| Former                                                         | 0.7546  | 0.7361                  | 0.7735 | 0.7741  | 0.7549                  | 0.7938 | 0.7708  | 0.7512                  | 0.7909 | 0.8128  | 0.7919                  | 0.8342 |
| Current                                                        | 0.4133  | 0.3973                  | 0.4298 | 0.4192  | 0.4030                  | 0.4361 | 0.4057  | 0.3896                  | 0.4226 | 0.5029  | 0.4825                  | 0.5242 |

*Note:* Bonferroni-adjusted (~99.9%) confidence intervals. OR = odds ratio; CI = confidence interval; BMI = body mass index. For categorical explanatory variables the odds ratios indicate the changes in odds of reporting better self-rated health associated with the explanatory variable group relative to the reference group. Odds ratios for continuous explanatory variables indicate proportional odds ratios for a 1-unit increase in the explanatory variable on level of self-rated health. <sup>1</sup>number of days per week engaging in these activities for 10+ minutes continuously.

Model 1 – only individual explanatory variables.

Model 2 – adjusted for age and sex.

Model 3 – age, sex and all lifestyle factors.

Model 4 – all explanatory variables.

Environmental exposures

| Table S17. Environmental exposures associated with self-rated health |         |                         |        |         |                         |        |         |                         |        |         |                         |        |
|----------------------------------------------------------------------|---------|-------------------------|--------|---------|-------------------------|--------|---------|-------------------------|--------|---------|-------------------------|--------|
| Term                                                                 | Model 1 |                         |        | Model 2 |                         |        | Model 3 |                         |        | Model 4 |                         |        |
|                                                                      | OR      | Bonferroni-corrected CI |        | OR      | Bonferroni-corrected CI |        | OR      | Bonferroni-corrected CI |        | OR      | Bonferroni-corrected CI |        |
| <b>PM<sub>2.5</sub></b>                                              | 0.8860  | 0.8762                  | 0.8958 | 0.8829  | 0.8732                  | 0.8927 | 0.9192  | 0.8988                  | 0.9400 | 1.0283  | 1.0047                  | 1.0525 |
| <b>PM<sub>10</sub></b>                                               | 0.9628  | 0.9570                  | 0.9687 | 0.9621  | 0.9562                  | 0.9679 | 0.9963  | 0.9890                  | 1.0037 | 0.9979  | 0.9904                  | 1.0055 |
| <b>NO<sub>2</sub></b>                                                | 0.9843  | 0.9829                  | 0.9858 | 0.9838  | 0.9823                  | 0.9853 | 0.9906  | 0.9870                  | 0.9942 | 0.9948  | 0.9910                  | 0.9986 |
| <b>L<sub>den</sub></b>                                               | 0.9951  | 0.9924                  | 0.9977 | 0.9950  | 0.9923                  | 0.9976 | 1.0072  | 1.0041                  | 1.0104 | 1.0025  | 0.9993                  | 1.0058 |
| <b>Greenspace 1000m</b>                                              | 1.0039  | 1.0034                  | 1.0044 | 1.0041  | 1.0035                  | 1.0046 | 0.9990  | 0.9981                  | 0.9998 | 1.0007  | 0.9998                  | 1.0015 |

*Note:* Bonferroni-adjusted (~99.9%) confidence intervals. OR = odds ratio; CI = confidence interval; PM = particulate matter; NO<sub>2</sub> = nitrogen dioxide; L<sub>den</sub> = day-evening-night noise level. Odds ratios indicate proportional odds ratios for a 1-unit increase in the explanatory variable on level of self-rated health.

Model 1 – only individual explanatory variables.

Model 2 – adjusted for age and sex.

Model 3 – age, sex and all environmental exposures.

Model 4 – all explanatory variables.

Tables S18-S21. Regression tables health indicators

Sociodemographic characteristics

| Table S18. Sociodemographic characteristics associated with health indicators |               |                         |        |                       |                         |        |                   |                         |        |
|-------------------------------------------------------------------------------|---------------|-------------------------|--------|-----------------------|-------------------------|--------|-------------------|-------------------------|--------|
| Term                                                                          | Health status |                         |        | Long-standing illness |                         |        | Self-rated health |                         |        |
|                                                                               | OR            | Bonferroni-corrected CI |        | OR                    | Bonferroni-corrected CI |        | OR <sup>3</sup>   | Bonferroni-corrected CI |        |
| <b>Household income<sup>1</sup></b>                                           |               |                         |        |                       |                         |        |                   |                         |        |
| Very low                                                                      | 0.7447        | 0.7148                  | 0.7759 | 0.6654                | 0.6384                  | 0.6934 | 0.6192            | 0.5960                  | 0.6432 |
| Low                                                                           | 0.9196        | 0.8864                  | 0.9541 | 0.8906                | 0.8581                  | 0.9244 | 0.8512            | 0.8234                  | 0.8799 |
| Middle                                                                        | Ref           | –                       | –      | Ref                   | –                       | –      | Ref               | –                       | –      |
| High                                                                          | 1.0510        | 1.0096                  | 1.0941 | 1.1171                | 1.0726                  | 1.1634 | 1.2102            | 1.1691                  | 1.2526 |
| Very high                                                                     | 1.0472        | 0.9812                  | 1.1181 | 1.2524                | 1.1703                  | 1.3410 | 1.6364            | 1.5491                  | 1.7286 |
| <b>Sex</b>                                                                    |               |                         |        |                       |                         |        |                   |                         |        |
| Female                                                                        | Ref           | –                       | –      | Ref                   | –                       | –      | Ref               | –                       | –      |
| Male                                                                          | 0.8847        | 0.8610                  | 0.9090 | 0.7585                | 0.7380                  | 0.7797 | 0.7836            | 0.7648                  | 0.8030 |
| <b>Age</b>                                                                    |               |                         |        |                       |                         |        |                   |                         |        |
|                                                                               | 0.9528        | 0.9510                  | 0.9546 | 0.9730                | 0.9711                  | 0.9748 | 1.0113            | 1.0097                  | 1.0130 |
| <b>Multiple deprivation</b>                                                   |               |                         |        |                       |                         |        |                   |                         |        |
|                                                                               | 0.9952        | 0.9941                  | 0.9963 | 0.9921                | 0.9910                  | 0.9932 | 0.9923            | 0.9913                  | 0.9933 |
| <b>Ethnicity</b>                                                              |               |                         |        |                       |                         |        |                   |                         |        |
| White                                                                         | Ref           | –                       | –      | Ref                   | –                       | –      | Ref               | –                       | –      |
| Mixed-race                                                                    | 1.1037        | 0.9221                  | 1.3273 | 1.1223                | 0.9387                  | 1.3474 | 0.9019            | 0.7729                  | 1.0527 |
| Asian                                                                         | 1.0188        | 0.9149                  | 1.1359 | 1.2225                | 1.0962                  | 1.3652 | 0.5995            | 0.5445                  | 0.6602 |
| Black                                                                         | 1.3125        | 1.1657                  | 1.4805 | 1.1852                | 1.0591                  | 1.3277 | 1.0896            | 0.9839                  | 1.2069 |
| Chinese                                                                       | 1.8339        | 1.3646                  | 2.5106 | 1.6205                | 1.2207                  | 2.1842 | 0.6783            | 0.5413                  | 0.8506 |
| Other                                                                         | 1.2570        | 1.0727                  | 1.4779 | 1.2027                | 1.0301                  | 1.4078 | 0.8903            | 0.7746                  | 1.0235 |
| <b>Highest qualification</b>                                                  |               |                         |        |                       |                         |        |                   |                         |        |
| None                                                                          | Ref           | –                       | –      | Ref                   | –                       | –      | Ref               | –                       | –      |
| O levels/GCSEs/CSEs                                                           | 1.0315        | 0.9870                  | 1.0779 | 0.9920                | 0.9485                  | 1.0375 | 1.2420            | 1.1920                  | 1.2941 |
| A levels/NVQ/HND/HNC <sup>2</sup>                                             | 0.9879        | 0.9445                  | 1.0332 | 0.8953                | 0.8554                  | 0.9371 | 1.2876            | 1.2345                  | 1.3429 |
| Degree                                                                        | 0.9558        | 0.9137                  | 0.9997 | 0.8550                | 0.8167                  | 0.8950 | 1.5031            | 1.4412                  | 1.5676 |

Note: Estimates from Model 4 (i.e. including all explanatory variables). Bonferroni-adjusted (~99.9%) confidence intervals. OR = odds ratio; CI = confidence interval; GCSEs = general certificate of secondary education; CSE = certificate of secondary education; NVQ = national vocational qualification; HND = higher national diploma; HNC = higher national certificate. <sup>1</sup>Annual household income groups: very low (<£18,000), low (£18,000–£30,999), middle (£31,000–£51,999), high (£52,000–£100,000) and very high (>£100,000). <sup>2</sup>also includes 'other professional qualifications'. <sup>3</sup>For categorical explanatory variables the odds ratios indicate the changes in odds of reporting better self-rated health associated with the explanatory variable group relative to the reference group. Odds ratios for continuous explanatory variables indicate proportional odds ratios for a 1-unit increase in the explanatory variable on level of self-rated health.

Psychosocial factors

| Table S19. Psychosocial factors associated with health indicators |               |                         |        |                       |                         |        |                   |                         |        |
|-------------------------------------------------------------------|---------------|-------------------------|--------|-----------------------|-------------------------|--------|-------------------|-------------------------|--------|
| Term                                                              | Health status |                         |        | Long-standing illness |                         |        | Self-rated health |                         |        |
|                                                                   | OR            | Bonferroni-corrected CI |        | OR                    | Bonferroni-corrected CI |        | OR <sup>1</sup>   | Bonferroni-corrected CI |        |
| <b>Loneliness</b>                                                 |               |                         |        |                       |                         |        |                   |                         |        |
| Not lonely                                                        | Ref           | –                       | –      | Ref                   | –                       | –      | Ref               | –                       | –      |
| Lonely                                                            | 0.8129        | 0.7697                  | 0.8587 | 0.7097                | 0.6722                  | 0.7494 | 0.4921            | 0.4678                  | 0.5176 |
| <b>Social isolation</b>                                           |               |                         |        |                       |                         |        |                   |                         |        |
| Not isolated                                                      | Ref           | –                       | –      | Ref                   | –                       | –      | Ref               | –                       | –      |
| Isolated                                                          | 0.9496        | 0.9067                  | 0.9947 | 0.9185                | 0.8770                  | 0.9621 | 0.8593            | 0.8233                  | 0.8970 |

*Note:* Estimates from Model 4 (i.e. including all explanatory variables). Bonferroni-adjusted (~99.9%) confidence intervals. OR = odds ratio; CI = confidence interval. <sup>1</sup>For categorical explanatory variables the odds ratios indicate the changes in odds of reporting better self-rated health associated with the explanatory variable group relative to the reference group.

## Lifestyle factors

| Table S20. Lifestyle factors associated with health indicators |               |                         |        |                       |                         |        |                   |                         |        |
|----------------------------------------------------------------|---------------|-------------------------|--------|-----------------------|-------------------------|--------|-------------------|-------------------------|--------|
| Term                                                           | Health status |                         |        | Long-standing illness |                         |        | Self-rated health |                         |        |
|                                                                | OR            | Bonferroni-corrected CI |        | OR                    | Bonferroni-corrected CI |        | OR <sup>2</sup>   | Bonferroni-corrected CI |        |
| <b>Sleep duration</b> (hours/day)                              | 0.9748        | 0.9631                  | 0.9868 | 1.0004                | 0.9882                  | 1.0128 | 1.0730            | 1.0609                  | 1.0852 |
| <b>Physical activity</b> (days/week) <sup>1</sup>              |               |                         |        |                       |                         |        |                   |                         |        |
| Walking                                                        | 1.0105        | 1.0032                  | 1.0178 | 1.0250                | 1.0175                  | 1.0325 | 1.0522            | 1.0454                  | 1.0591 |
| Moderate activity                                              | 1.0032        | 0.9964                  | 1.0100 | 0.9984                | 0.9916                  | 1.0053 | 1.0132            | 1.0070                  | 1.0195 |
| Vigorous activity                                              | 1.0319        | 1.0238                  | 1.0400 | 1.0641                | 1.0557                  | 1.0727 | 1.1668            | 1.1585                  | 1.1751 |
| <b>Stair climbing frequency</b>                                |               |                         |        |                       |                         |        |                   |                         |        |
| None                                                           | Ref           | –                       | –      | Ref                   | –                       | –      | Ref               | –                       | –      |
| 1-5/day                                                        | 1.0704        | 1.0148                  | 1.1289 | 1.1101                | 1.0522                  | 1.1710 | 1.0533            | 1.0019                  | 1.1074 |
| 6-10/day                                                       | 1.1756        | 1.1188                  | 1.2352 | 1.2937                | 1.2307                  | 1.3598 | 1.2293            | 1.1733                  | 1.2878 |
| 11-15/day                                                      | 1.1714        | 1.1098                  | 1.2363 | 1.3131                | 1.2434                  | 1.3866 | 1.2892            | 1.2260                  | 1.3557 |
| 16-20/day                                                      | 1.1650        | 1.0937                  | 1.2410 | 1.3066                | 1.2255                  | 1.3932 | 1.2991            | 1.2258                  | 1.3767 |
| 20+/day                                                        | 1.1881        | 1.1097                  | 1.2723 | 1.2975                | 1.2108                  | 1.3907 | 1.3652            | 1.2828                  | 1.4529 |
| <b>Alcohol intake frequency</b>                                |               |                         |        |                       |                         |        |                   |                         |        |
| Never                                                          | 0.6285        | 0.5946                  | 0.6644 | 0.5533                | 0.5234                  | 0.5850 | 0.6624            | 0.6285                  | 0.6981 |
| Special occasions                                              | 0.7792        | 0.7429                  | 0.8174 | 0.7142                | 0.6809                  | 0.7492 | 0.7565            | 0.7240                  | 0.7904 |
| 1-3/month                                                      | 0.9129        | 0.8708                  | 0.9570 | 0.8486                | 0.8096                  | 0.8895 | 0.9201            | 0.8821                  | 0.9597 |
| 1-2/week                                                       | Ref           | –                       | –      | Ref                   | –                       | –      | Ref               | –                       | –      |
| 3-4/week                                                       | 1.0590        | 1.0198                  | 1.0998 | 1.0925                | 1.0514                  | 1.1353 | 1.0520            | 1.0178                  | 1.0875 |
| Daily/almost daily                                             | 1.0334        | 0.9939                  | 1.0745 | 1.0744                | 1.0326                  | 1.1180 | 1.0264            | 0.9913                  | 1.0628 |
| <b>BMI</b> (kg/m <sup>2</sup> )                                | 0.9683        | 0.9656                  | 0.9711 | 0.9419                | 0.9392                  | 0.9446 | 0.9045            | 0.9020                  | 0.9069 |
| <b>Smoking status</b>                                          |               |                         |        |                       |                         |        |                   |                         |        |
| Never                                                          | Ref           | –                       | –      | Ref                   | –                       | –      | Ref               | –                       | –      |
| Former                                                         | 0.7922        | 0.7698                  | 0.8152 | 0.7978                | 0.7749                  | 0.8213 | 0.8128            | 0.7919                  | 0.8342 |
| Current                                                        | 0.7518        | 0.7183                  | 0.7869 | 0.7858                | 0.7506                  | 0.8227 | 0.5029            | 0.4825                  | 0.5242 |

*Note:* Estimates from Model 4 (i.e. including all explanatory variables). Bonferroni-adjusted (~99.9%) confidence intervals. OR = odds ratio; CI = confidence interval; BMI = body mass index. <sup>1</sup>number of days per week engaging in these activities for 10+ minutes continuously. <sup>2</sup>For categorical explanatory variables the odds ratios indicate the changes in odds of reporting better self-rated health associated with the explanatory variable group relative to the reference group. Odds ratios for continuous explanatory variables indicate proportional odds ratios for a 1-unit increase in the explanatory variable on level of self-rated health.



Environmental exposures

| Table S21. Environmental exposures associated with health indicators |               |                         |        |                       |                         |        |                   |                         |        |
|----------------------------------------------------------------------|---------------|-------------------------|--------|-----------------------|-------------------------|--------|-------------------|-------------------------|--------|
| Term                                                                 | Health status |                         |        | Long-standing illness |                         |        | Self-rated health |                         |        |
|                                                                      | OR            | Bonferroni-corrected CI |        | OR                    | Bonferroni-corrected CI |        | OR <sup>1</sup>   | Bonferroni-corrected CI |        |
| <b>PM<sub>2.5</sub></b>                                              | 0.9656        | 0.9411                  | 0.9908 | 0.9677                | 0.9430                  | 0.9932 | 1.0283            | 1.0047                  | 1.0525 |
| <b>PM<sub>10</sub></b>                                               | 1.0019        | 0.9935                  | 1.0104 | 1.0019                | 0.9934                  | 1.0105 | 0.9979            | 0.9904                  | 1.0055 |
| <b>NO<sub>2</sub></b>                                                | 1.0036        | 0.9993                  | 1.0078 | 1.0025                | 0.9982                  | 1.0068 | 0.9948            | 0.9910                  | 0.9986 |
| <b>L<sub>den</sub></b>                                               | 0.9981        | 0.9945                  | 1.0017 | 1.0015                | 0.9979                  | 1.0052 | 1.0025            | 0.9993                  | 1.0058 |
| <b>Greenspace 1000m</b>                                              | 0.9995        | 0.9985                  | 1.0004 | 0.9997                | 0.9987                  | 1.0007 | 1.0007            | 0.9998                  | 1.0015 |

*Note:* Estimates from Model 4 (i.e. including all explanatory variables). Bonferroni-adjusted (~99.9%) confidence intervals. OR = odds ratio; CI = confidence interval; PM = particulate matter; NO<sub>2</sub> = nitrogen dioxide; L<sub>den</sub> = day-evening-night noise level. <sup>1</sup>Odds ratios indicate proportional odds ratios for a 1-unit increase in the explanatory variable on level of self-rated health.

Tables S22-S24. Standardised regression coefficients tables

Health status

| Table S22. Standardised regression coefficients health status |         |                         |         |
|---------------------------------------------------------------|---------|-------------------------|---------|
| Term                                                          | $\beta$ | Bonferroni-corrected CI |         |
| <b>Sociodemographic characteristics</b>                       |         |                         |         |
| <b>Household income<sup>1</sup></b>                           |         |                         |         |
| Very low                                                      | -0.2948 | -0.3358                 | -0.2538 |
| Low                                                           | -0.0838 | -0.1206                 | -0.047  |
| Middle                                                        | Ref     | –                       | –       |
| High                                                          | 0.0497  | 0.0095                  | 0.0899  |
| Very high                                                     | 0.0461  | -0.019                  | 0.1116  |
| <b>Sex</b>                                                    |         |                         |         |
| Female                                                        | Ref     | –                       | –       |
| Male                                                          | -0.1225 | -0.1496                 | -0.0954 |
| <b>Age</b>                                                    |         |                         |         |
| Multiple deprivation                                          | -0.1295 | -0.1591                 | -0.0998 |
| <b>Ethnicity</b>                                              |         |                         |         |
| White                                                         | Ref     | –                       | –       |
| Mixed-race                                                    | 0.0987  | -0.0811                 | 0.2831  |
| Asian                                                         | 0.0187  | -0.0889                 | 0.1274  |
| Black                                                         | 0.2719  | 0.1533                  | 0.3924  |
| Chinese                                                       | 0.6065  | 0.3109                  | 0.9205  |
| Other                                                         | 0.2287  | 0.0702                  | 0.3906  |
| <b>Highest qualification</b>                                  |         |                         |         |
| None                                                          | Ref     | –                       | –       |
| O levels/GCSEs/CSEs                                           | 0.031   | -0.0131                 | 0.075   |
| A levels/NVQ/HND/HNC <sup>2</sup>                             | -0.0122 | -0.0571                 | 0.0326  |
| Degree                                                        | -0.0453 | -0.0902                 | -0.0003 |
| <b>Psychosocial factors</b>                                   |         |                         |         |
| <b>Loneliness</b>                                             |         |                         |         |
| Not lonely                                                    | Ref     | –                       | –       |
| Lonely                                                        | -0.2072 | -0.2618                 | -0.1524 |
| <b>Social isolation</b>                                       |         |                         |         |
| Not isolated                                                  | Ref     | –                       | –       |
| Isolated                                                      | -0.0517 | -0.098                  | -0.0053 |
| <b>Lifestyle factors</b>                                      |         |                         |         |
| Sleep duration (hours/day)                                    | -0.0538 | -0.0794                 | -0.0281 |
| <b>Physical activity (days/week)<sup>3</sup></b>              |         |                         |         |
| Walking                                                       | 0.0406  | 0.0124                  | 0.0687  |
| Moderate activity                                             | 0.0147  | -0.0168                 | 0.0462  |
| Vigorous activity                                             | 0.1218  | 0.0914                  | 0.1523  |
| <b>Stair climbing frequency</b>                               |         |                         |         |
| None                                                          | Ref     | –                       | –       |
| 1-5/day                                                       | 0.068   | 0.0147                  | 0.1213  |
| 6-10/day                                                      | 0.1618  | 0.1122                  | 0.2113  |
| 11-15/day                                                     | 0.1581  | 0.1042                  | 0.2121  |
| 16-20/day                                                     | 0.1527  | 0.0896                  | 0.2159  |
| 20+/day                                                       | 0.1724  | 0.1041                  | 0.2408  |
| <b>Alcohol intake frequency</b>                               |         |                         |         |
| Never                                                         | -0.4644 | -0.5198                 | -0.4089 |
| Special occasions                                             | -0.2494 | -0.2972                 | -0.2016 |
| 1-3/month                                                     | -0.0911 | -0.1384                 | -0.0439 |
| 1-2/week                                                      | Ref     | –                       | –       |
| 3-4/week                                                      | 0.0574  | 0.0196                  | 0.0952  |
| Daily/almost daily                                            | 0.0329  | -0.0062                 | 0.0718  |
| BMI (kg/m <sup>2</sup> )                                      | -0.3001 | -0.3267                 | -0.2735 |
| <b>Smoking status</b>                                         |         |                         |         |
| Never                                                         | Ref     | –                       | –       |
| Former                                                        | -0.233  | -0.2616                 | -0.2043 |
| Current                                                       | -0.2853 | -0.3309                 | -0.2396 |
| <b>Environmental exposures</b>                                |         |                         |         |
| PM <sub>2.5</sub>                                             | -0.0728 | -0.1261                 | -0.0193 |
| PM <sub>10</sub>                                              | 0.007   | -0.0246                 | 0.0388  |
| NO <sub>2</sub>                                               | 0.0538  | -0.0103                 | 0.1177  |
| L <sub>den</sub>                                              | -0.0162 | -0.0466                 | 0.0143  |
| Greenspace 1000m                                              | -0.023  | -0.0652                 | 0.0192  |

Note:  $\beta$  = Model 4 regression coefficients rescaled to have a mean equal to zero and, for numeric variables with more than two values, divided by two standard deviations. Bonferroni-adjusted (~99.9%) confidence intervals. CI = confidence interval; GCSEs = general certificate of secondary education; CSE = certificate of secondary education; NVQ = national vocational qualification; HND = higher national diploma; HNC = higher national certificate; BMI = body mass index; PM = particulate matter; NO<sub>2</sub> = nitrogen dioxide; L<sub>den</sub> = day-evening-night noise level. <sup>1</sup>Annual household income groups: very low (<£18,000), low (£18,000–£30,999), middle (£31,000–£51,999), high (£52,000–£100,000) and very high (>£100,000). <sup>2</sup>also includes 'other professional qualifications'. <sup>3</sup>number of days per week engaging in these activities for 10+ minutes continuously.

| Table S23. Standardised regression coefficients for long-standing illness |         |                        |         |
|---------------------------------------------------------------------------|---------|------------------------|---------|
| Term                                                                      | $\beta$ | Bonferroni-adjusted CI |         |
| <b>Sociodemographic characteristics</b>                                   |         |                        |         |
| <b>Household income<sup>1</sup></b>                                       |         |                        |         |
| Very low                                                                  | -0.4074 | -0.4487                | -0.3661 |
| Low                                                                       | -0.1158 | -0.153                 | -0.0786 |
| Middle                                                                    | Ref     | –                      | –       |
| High                                                                      | 0.1107  | 0.0701                 | 0.1514  |
| Very high                                                                 | 0.2251  | 0.1573                 | 0.2934  |
| <b>Sex</b>                                                                |         |                        |         |
| Female                                                                    | Ref     | –                      | –       |
| Male                                                                      | -0.2763 | -0.3038                | -0.2489 |
| <b>Age</b>                                                                |         |                        |         |
| Multiple deprivation                                                      | -0.4423 | -0.4729                | -0.4117 |
| Ethnicity                                                                 | -0.2125 | -0.2421                | -0.1828 |
| <b>Ethnicity</b>                                                          |         |                        |         |
| White                                                                     | Ref     | –                      | –       |
| Mixed-race                                                                | 0.1154  | -0.0632                | 0.2982  |
| Asian                                                                     | 0.2009  | 0.0918                 | 0.3113  |
| Black                                                                     | 0.1699  | 0.0574                 | 0.2835  |
| Chinese                                                                   | 0.4827  | 0.1994                 | 0.7812  |
| Other                                                                     | 0.1846  | 0.0297                 | 0.3421  |
| <b>Highest qualification</b>                                              |         |                        |         |
| None                                                                      | Ref     | –                      | –       |
| O levels/GCSEs/CSEs                                                       | -0.008  | -0.0529                | 0.0368  |
| A levels/NVQ/HND/HNC <sup>2</sup>                                         | -0.1106 | -0.1562                | -0.0649 |
| Degree                                                                    | -0.1567 | -0.2025                | -0.1109 |
| <b>Psychosocial factors</b>                                               |         |                        |         |
| <b>Loneliness</b>                                                         |         |                        |         |
| Not lonely                                                                | Ref     | –                      | –       |
| Lonely                                                                    | -0.3429 | -0.3971                | -0.2885 |
| <b>Social isolation</b>                                                   |         |                        |         |
| Not isolated                                                              | Ref     | –                      | –       |
| Isolated                                                                  | -0.085  | -0.1313                | -0.0387 |
| <b>Lifestyle factors</b>                                                  |         |                        |         |
| Sleep duration (hours/day)                                                | 0.0009  | -0.025                 | 0.0268  |
| <b>Physical activity (days/week)<sup>3</sup></b>                          |         |                        |         |
| Walking                                                                   | 0.096   | 0.0677                 | 0.1243  |
| Moderate activity                                                         | -0.0074 | -0.0393                | 0.0245  |
| Vigorous activity                                                         | 0.2413  | 0.2103                 | 0.2724  |
| <b>Stair climbing frequency</b>                                           |         |                        |         |
| None                                                                      | Ref     | –                      | –       |
| 1-5/day                                                                   | 0.1044  | 0.0509                 | 0.1579  |
| 6-10/day                                                                  | 0.2575  | 0.2076                 | 0.3073  |
| 11-15/day                                                                 | 0.2724  | 0.2179                 | 0.3269  |
| 16-20/day                                                                 | 0.2675  | 0.2034                 | 0.3316  |
| 20+/day                                                                   | 0.2605  | 0.1913                 | 0.3298  |
| <b>Alcohol intake frequency</b>                                           |         |                        |         |
| Never                                                                     | -0.5918 | -0.6474                | -0.5361 |
| Special occasions                                                         | -0.3366 | -0.3844                | -0.2888 |
| 1-3/month                                                                 | -0.1642 | -0.2113                | -0.1171 |
| 1-2/week                                                                  | Ref     | –                      | –       |
| 3-4/week                                                                  | 0.0885  | 0.0501                 | 0.1269  |
| Daily/almost daily                                                        | 0.0718  | 0.032                  | 0.1115  |
| BMI (kg/m <sup>2</sup> )                                                  | -0.5586 | -0.5855                | -0.5317 |
| <b>Smoking status</b>                                                     |         |                        |         |
| Never                                                                     | Ref     | –                      | –       |
| Former                                                                    | -0.2259 | -0.255                 | -0.1969 |
| Current                                                                   | -0.2411 | -0.2868                | -0.1952 |
| <b>Environmental exposures</b>                                            |         |                        |         |
| PM <sub>2.5</sub>                                                         | -0.0682 | -0.1221                | -0.0142 |
| PM <sub>10</sub>                                                          | 0.0072  | -0.0249                | 0.0393  |
| NO <sub>2</sub>                                                           | 0.0381  | -0.0266                | 0.1029  |
| L <sub>den</sub>                                                          | 0.0127  | -0.0181                | 0.0436  |
| Greenspace 1000m                                                          | -0.0133 | -0.0562                | 0.0295  |

Note:  $\beta$  = Model 4 regression coefficients rescaled to have a mean equal to zero and, for numeric variables with more than two values, divided by two standard deviations. Bonferroni-adjusted (~99.9%) confidence intervals. CI = confidence interval; GCSEs = general certificate of secondary education; CSE = certificate of secondary education; NVQ = national vocational qualification; HND = higher national diploma; HNC = higher national certificate; BMI = body mass index; PM = particulate matter; NO<sub>2</sub> = nitrogen dioxide; L<sub>den</sub> = day-evening-night noise level. <sup>1</sup>Annual household income groups: very low (<£18,000), low (£18,000–£30,999), middle (£31,000–£51,999), high (£52,000–£100,000) and very high (>£100,000). <sup>2</sup>also includes 'other professional qualifications'. <sup>3</sup>number of days per week engaging in these activities for 10+ minutes continuously.

Self-rated health

| <b>Table S24. Standardised regression coefficients for self-rated health</b> |         |                         |         |
|------------------------------------------------------------------------------|---------|-------------------------|---------|
| Term                                                                         | $\beta$ | Bonferroni-corrected CI |         |
| <b>Sociodemographic characteristics</b>                                      |         |                         |         |
| <b>Household income<sup>1</sup></b>                                          |         |                         |         |
| Very low                                                                     | -0.4794 | -0.5174                 | -0.4412 |
| Low                                                                          | -0.1611 | -0.1943                 | -0.128  |
| Middle                                                                       | Ref     | –                       | –       |
| High                                                                         | 0.1908  | 0.1563                  | 0.2252  |
| Very high                                                                    | 0.4925  | 0.444                   | 0.5477  |
| <b>Sex</b>                                                                   |         |                         |         |
| Female                                                                       | Ref     | –                       | –       |
| Male                                                                         | -0.2438 | -0.2682                 | -0.2194 |
| <b>Age</b>                                                                   | 0.1819  | 0.1552                  | 0.2086  |
| <b>Multiple deprivation</b>                                                  | -0.2054 | -0.2325                 | -0.1783 |
| <b>Ethnicity</b>                                                             |         |                         |         |
| White                                                                        | Ref     | –                       | –       |
| Mixed-race                                                                   | -0.1034 | -0.2572                 | 0.0508  |
| Asian                                                                        | -0.5116 | -0.6077                 | -0.4153 |
| Black                                                                        | 0.0858  | -0.016                  | 0.1879  |
| Chinese                                                                      | -0.3881 | -0.6128                 | -0.163  |
| Other                                                                        | -0.1163 | -0.2553                 | 0.0229  |
| <b>Highest qualification</b>                                                 |         |                         |         |
| None                                                                         | Ref     | –                       | –       |
| O levels/GCSEs/CSEs                                                          | 0.2167  | 0.1761                  | 0.2578  |
| A levels/NVQ/HND/HNC <sup>2</sup>                                            | 0.2528  | 0.211                   | 0.2947  |
| Degree                                                                       | 0.4075  | 0.3655                  | 0.4495  |
| <b>Psychosocial factors</b>                                                  |         |                         |         |
| <b>Loneliness</b>                                                            |         |                         |         |
| Not lonely                                                                   | Ref     | –                       | –       |
| Lonely                                                                       | -0.7092 | -0.7596                 | -0.6587 |
| <b>Social isolation</b>                                                      |         |                         |         |
| Not isolated                                                                 | Ref     | –                       | –       |
| Isolated                                                                     | -0.1516 | -0.1944                 | -0.1087 |
| <b>Lifestyle factors</b>                                                     |         |                         |         |
| <b>Sleep duration</b> (hours/day)                                            | 0.1487  | 0.1248                  | 0.1726  |
| <b>Physical activity</b> (days/week) <sup>3</sup>                            |         |                         |         |
| Walking                                                                      | 0.198   | 0.1726                  | 0.2234  |
| Moderate activity                                                            | 0.061   | 0.0326                  | 0.0895  |
| Vigorous activity                                                            | 0.5988  | 0.5711                  | 0.6266  |
| <b>Stair climbing frequency</b>                                              |         |                         |         |
| None                                                                         | Ref     | –                       | –       |
| 1-5/day                                                                      | 0.052   | 0.0019                  | 0.102   |
| 6-10/day                                                                     | 0.2064  | 0.1599                  | 0.2529  |
| 11-15/day                                                                    | 0.2541  | 0.2037                  | 0.3043  |
| 16-20/day                                                                    | 0.2617  | 0.2037                  | 0.3196  |
| 20+/day                                                                      | 0.3113  | 0.2489                  | 0.3738  |
| <b>Alcohol intake frequency</b>                                              |         |                         |         |
| Never                                                                        | -0.4119 | -0.4631                 | -0.3607 |
| Special occasions                                                            | -0.2791 | -0.3229                 | -0.2352 |
| 1-3/month                                                                    | -0.0833 | -0.1254                 | -0.0411 |
| 1-2/week                                                                     | Ref     | –                       | –       |
| 3-4/week                                                                     | 0.0507  | 0.0177                  | 0.0837  |
| Daily/almost daily                                                           | 0.0261  | -0.0093                 | 0.0609  |
| <b>BMI</b> (kg/m <sup>2</sup> )                                              | -0.9368 | -0.9616                 | -0.912  |
| <b>Smoking status</b>                                                        |         |                         |         |
| Never                                                                        | Ref     | –                       | –       |
| Former                                                                       | -0.2073 | -0.2332                 | -0.1813 |
| Current                                                                      | -0.6873 | -0.7287                 | -0.6459 |
| <b>Environmental exposures</b>                                               |         |                         |         |
| <b>PM<sub>2.5</sub></b>                                                      | 0.0581  | 0.01                    | 0.1064  |
| <b>PM<sub>10</sub></b>                                                       | -0.0077 | -0.0359                 | 0.0206  |
| <b>NO<sub>2</sub></b>                                                        | -0.0784 | -0.1362                 | -0.0207 |
| <b>L<sub>den</sub></b>                                                       | 0.0214  | -0.0059                 | 0.0487  |
| <b>Greenspace</b> 1000m                                                      | 0.0289  | -0.0089                 | 0.0666  |

Note:  $\beta$  = Model 4 regression coefficients rescaled to have a mean equal to zero and, for numeric variables with more than two values, divided by two standard deviations. Bonferroni-adjusted (~99.9%) confidence intervals. CI = confidence interval; GCSEs = general certificate of secondary education; CSE = certificate of secondary education; NVQ = national vocational qualification; HND = higher national diploma; HNC = higher national certificate; BMI = body mass index; PM = particulate matter; NO<sub>2</sub> = nitrogen dioxide; L<sub>den</sub> = day-evening-night noise level. <sup>1</sup>Annual household income groups: very low (<£18,000), low (£18,000–£30,999), middle (£31,000–£51,999), high (£52,000–£100,000) and very high (>£100,000). <sup>2</sup>also includes 'other professional qualifications'. <sup>3</sup>number of days per week engaging in these activities for 10+ minutes continuously.

Figures S5-S6. Standardised regression coefficients plots

Long-standing illness

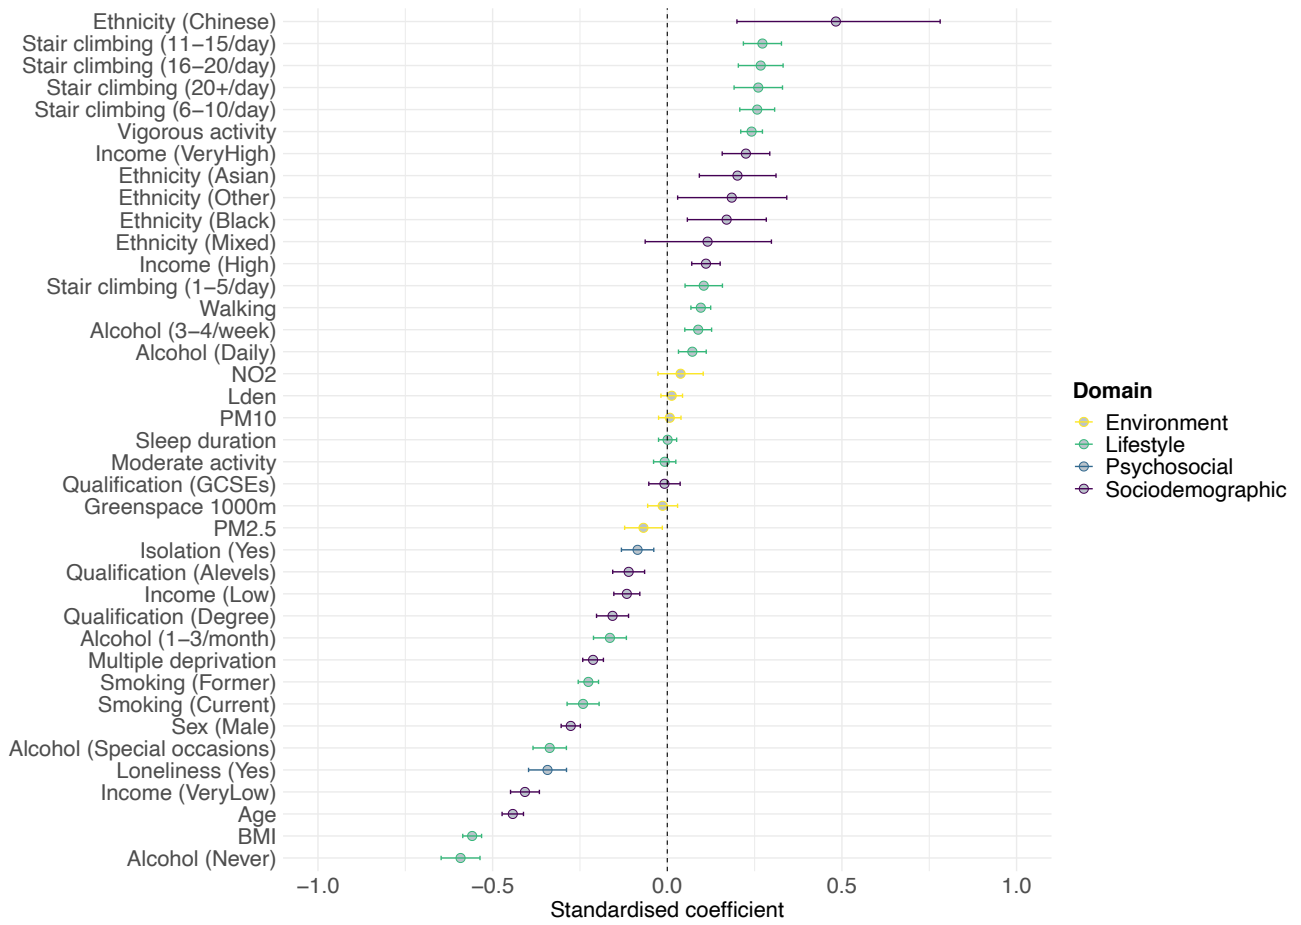

Figure S5. Confidence interval plot for long-standing illness. Standardised  $\beta$  estimates and Bonferroni-adjusted (~99.9%) confidence intervals. Model 4 regression coefficients were rescaled to have a mean equal to zero and, for numeric variables with more than two values, divided by two standard deviations.

Self-rated health

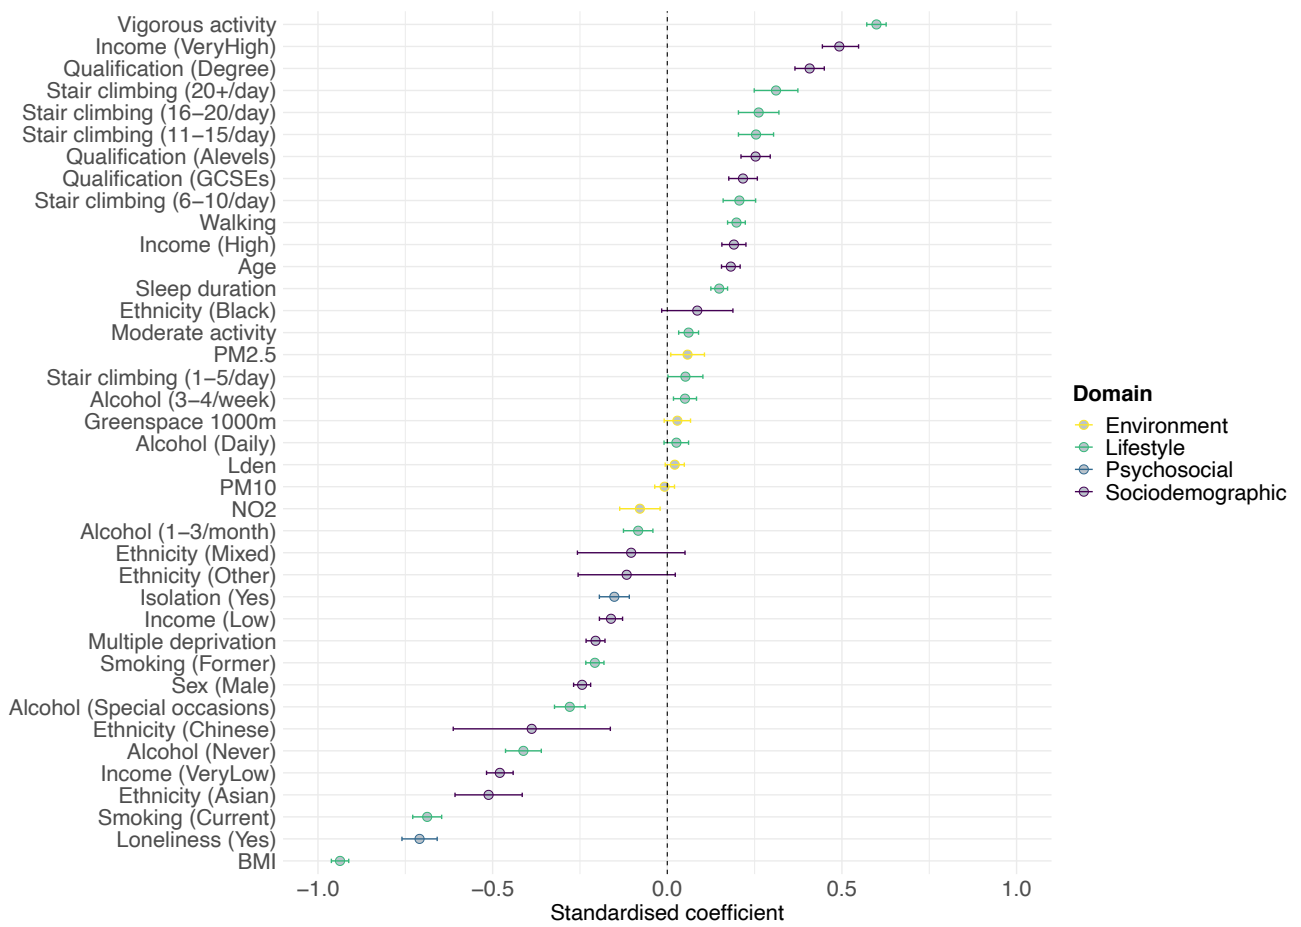

**Figure S6.** Confidence interval plot for self-rated health. Standardised  $\beta$  estimates and Bonferroni-adjusted (~99.9%) confidence intervals. Model 4 regression coefficients were rescaled to have a mean equal to zero and, for numeric variables with more than two values, divided by two standard deviations.

**Table S25. Baseline characteristics stratified by sex**

| Table S25. Baseline characteristics stratified by sex |                         |                       |         |
|-------------------------------------------------------|-------------------------|-----------------------|---------|
|                                                       | Female<br>(n = 159 574) | Male<br>(n = 147 804) | p value |
| <b>Health indicators</b>                              |                         |                       |         |
| <b>Health status</b>                                  |                         |                       | < 0.001 |
| Unhealthy                                             | 47 016 (29.5%)          | 48 161 (32.6%)        |         |
| Healthy                                               | 112 558 (70.5%)         | 99 643 (67.4%)        |         |
| <b>Long-standing illness</b>                          |                         |                       | < 0.001 |
| Yes                                                   | 44 607 (28.0%)          | 49 150 (33.3%)        |         |
| No                                                    | 114 967 (72.0%)         | 98 654 (66.7%)        |         |
| <b>Self-rated health</b>                              |                         |                       | < 0.001 |
| Poor                                                  | 4 991 (3.1%)            | 6 075 (4.1%)          |         |
| Fair                                                  | 27 657 (17.3%)          | 31 512 (21.3%)        |         |
| Good                                                  | 97 197 (60.9%)          | 85 502 (57.8%)        |         |
| Excellent                                             | 29 729 (18.6%)          | 24 715 (16.7%)        |         |
| <b>Sociodemographic characteristics</b>               |                         |                       |         |
| <b>Age</b>                                            |                         |                       | < 0.001 |
| Mean (SD)                                             | 55.68 (7.96)            | 56.56 (8.16)          |         |
| Range                                                 | 39.00-71.00             | 38.00-73.00           |         |
| <b>Ethnicity</b>                                      |                         |                       | < 0.001 |
| White                                                 | 152 293 (95.4%)         | 141 272 (95.6%)       |         |
| Mixed-race                                            | 1 105 (0.7%)            | 661 (0.4%)            |         |
| Black                                                 | 2 445 (1.5%)            | 1 812 (1.2%)          |         |
| Asian                                                 | 2 016 (1.3%)            | 2 739 (1.9%)          |         |
| Chinese                                               | 505 (0.3%)              | 313 (0.2%)            |         |
| Other                                                 | 1 210 (0.8%)            | 1 007 (0.7%)          |         |
| <b>Highest qualification</b>                          |                         |                       | < 0.001 |
| None                                                  | 19 497 (12.2%)          | 20 331 (13.8%)        |         |
| O levels/GCSEs/CSEs                                   | 47 467 (29.7%)          | 36 981 (25.0%)        |         |
| A levels/NVQ/HND/HNC <sup>1</sup>                     | 36 545 (22.9%)          | 36 039 (24.4%)        |         |
| Degree                                                | 56 065 (35.1%)          | 54 453 (36.8%)        |         |
| <b>Household income<sup>2</sup></b>                   |                         |                       | < 0.001 |
| Very low                                              | 41 713 (26.1%)          | 40 625 (27.5%)        |         |
| Low                                                   | 35 968 (22.5%)          | 27 131 (18.4%)        |         |
| Medium                                                | 42 060 (26.4%)          | 35 871 (24.3%)        |         |
| High                                                  | 31 507 (19.7%)          | 34 599 (23.4%)        |         |
| Very high                                             | 8 326 (5.2%)            | 9 578 (6.5%)          |         |
| <b>Multiple deprivation</b>                           |                         |                       | < 0.001 |
| Mean (SD)                                             | 16.65 (13.13)           | 16.90 (13.54)         |         |
| Range                                                 | 0.61-82.00              | 0.61-82.00            |         |
| <b>Psychosocial factors</b>                           |                         |                       |         |
| <b>Loneliness</b>                                     |                         |                       | < 0.001 |
| Not lonely                                            | 150 898 (94.6%)         | 139 003 (94.0%)       |         |
| Lonely                                                | 8 676 (5.4%)            | 8 801 (6.0%)          |         |
| <b>Social isolation</b>                               |                         |                       | < 0.001 |
| Not isolated                                          | 146 366 (91.7%)         | 134 565 (91.0%)       |         |
| Isolated                                              | 13 208 (8.3%)           | 13 239 (9.0%)         |         |
| <b>Lifestyle factors</b>                              |                         |                       |         |
| <b>Smoking status</b>                                 |                         |                       | < 0.001 |
| Never                                                 | 94 928 (59.5%)          | 73 547 (49.8%)        |         |
| Former                                                | 51 194 (32.1%)          | 57 444 (38.9%)        |         |
| Current                                               | 13 452 (8.4%)           | 16 813 (11.4%)        |         |
| <b>Stair climbing frequency</b>                       |                         |                       | < 0.001 |
| None                                                  | 12 398 (7.8%)           | 11 651 (7.9%)         |         |
| 1-5/day                                               | 28 452 (17.8%)          | 29 815 (20.2%)        |         |
| 6-10/day                                              | 59 067 (37.0%)          | 56 915 (38.5%)        |         |
| 11-15/day                                             | 32 437 (20.3%)          | 27 878 (18.9%)        |         |
| 16-20/day                                             | 15 174 (9.5%)           | 12 435 (8.4%)         |         |
| 20+/day                                               | 12 046 (7.5%)           | 9 110 (6.2%)          |         |
| <b>Alcohol intake frequency</b>                       |                         |                       | < 0.001 |
| Never                                                 | 41 206 (25.8%)          | 37 571 (25.4%)        |         |
| Special occasions                                     | 12 551 (7.9%)           | 7 872 (5.3%)          |         |
| 1-3/month                                             | 21 911 (13.7%)          | 9 615 (6.5%)          |         |
| 1-2/week                                              | 20 913 (13.1%)          | 12 885 (8.7%)         |         |
| 3-4/week                                              | 35 098 (22.0%)          | 40 153 (27.2%)        |         |
| Daily/almost daily                                    | 27 895 (17.5%)          | 39 708 (26.9%)        |         |
| <b>Sleep duration (hours/day)</b>                     |                         |                       | < 0.001 |
| Mean (SD)                                             | 7.18 (1.06)             | 7.13 (1.04)           |         |
| Range                                                 | 1.00-20.00              | 1.00-20.00            |         |
| <b>BMI (kg/m<sup>2</sup>)</b>                         |                         |                       | < 0.001 |
| Mean (SD)                                             | 26.85 (5.07)            | 27.72 (4.13)          |         |
| Range                                                 | 12.80-67.30             | 12.80-63.40           |         |
| <b>Walking (days/week)<sup>3</sup></b>                |                         |                       | < 0.001 |

|                                                   |               |               |         |
|---------------------------------------------------|---------------|---------------|---------|
| Mean (SD)                                         | 5.43 (1.89)   | 5.29 (2.00)   |         |
| Range                                             | 0.00-7.00     | 0.00-7.00     |         |
| <b>Moderate activity</b> (days/week) <sup>3</sup> |               |               | 0.352   |
| Mean (SD)                                         | 3.59 (2.32)   | 3.58 (2.32)   |         |
| Range                                             | 0.00-7.00     | 0.00-7.00     |         |
| <b>Vigorous activity</b> (days/week) <sup>3</sup> |               |               | < 0.001 |
| Mean (SD)                                         | 1.70 (1.84)   | 2.07 (2.02)   |         |
| Range                                             | 0.00-7.00     | 0.00-7.00     |         |
| <b>Environmental exposures</b>                    |               |               |         |
| <b>PM<sub>2.5</sub></b>                           |               |               | 0.005   |
| Mean (SD)                                         | 9.96 (1.03)   | 9.95 (1.04)   |         |
| Range                                             | 8.17-19.89    | 8.17-21.25    |         |
| <b>PM<sub>10</sub></b>                            |               |               | 0.159   |
| Mean (SD)                                         | 16.19 (1.87)  | 16.18 (1.89)  |         |
| Range                                             | 11.78-30.65   | 11.78-30.65   |         |
| <b>NO<sub>2</sub></b>                             |               |               | < 0.001 |
| Mean (SD)                                         | 26.49 (7.53)  | 26.38 (7.59)  |         |
| Range                                             | 12.93-107.47  | 12.93-108.49  |         |
| <b>L<sub>den</sub></b>                            |               |               | 0.174   |
| Mean (SD)                                         | 56.00 (4.21)  | 56.02 (4.27)  |         |
| Range                                             | 51.55-89.29   | 51.55-86.50   |         |
| <b>Greenspace 1000m</b>                           |               |               | < 0.001 |
| Mean (SD)                                         | 45.27 (21.82) | 45.78 (21.71) |         |
| Range                                             | 4.49-99.18    | 4.54-99.19    |         |

Note: GCSEs = general certificate of secondary education; CSE = certificate of secondary education; NVQ = national vocational qualification; HND = higher national diploma; HNC = higher national certificate; BMI = body mass index; PM = particulate matter; NO<sub>2</sub> = nitrogen dioxide; L<sub>den</sub> = day-evening-night noise level. <sup>1</sup>also includes 'other professional qualifications'. <sup>2</sup>Annual household income groups: very low (<£18,000), low (£18,000–£30,999), middle (£31,000–£51,999), high (£52,000–£100,000) and very high (>£100,000). <sup>3</sup>number of days per week engaging in these activities for 10+ minutes continuously.



**Table S26. Baseline characteristics stratified by age**

| Table S26. Baseline characteristics stratified by age |                           |                              |         |
|-------------------------------------------------------|---------------------------|------------------------------|---------|
|                                                       | Below 65<br>(n = 254 361) | 65 and above<br>(n = 53 017) | p value |
| <b>Health indicators</b>                              |                           |                              |         |
| <b>Health status</b>                                  |                           |                              | < 0.001 |
| Unhealthy                                             | 71 234 (28.0%)            | 23 943 (45.2%)               |         |
| Healthy                                               | 183 127 (72.0%)           | 29 074 (54.8%)               |         |
| <b>Long-standing illness</b>                          |                           |                              | < 0.001 |
| Yes                                                   | 73 408 (28.9%)            | 20 349 (38.4%)               |         |
| No                                                    | 180 953 (71.1%)           | 32 668 (61.6%)               |         |
| <b>Self-rated health</b>                              |                           |                              | < 0.001 |
| Poor                                                  | 9 382 (3.7%)              | 1 684 (3.2%)                 |         |
| Fair                                                  | 48 636 (19.1%)            | 10 533 (19.9%)               |         |
| Good                                                  | 150 135 (59.0%)           | 32 564 (61.4%)               |         |
| Excellent                                             | 46 208 (18.2%)            | 8 236 (15.5%)                |         |
| <b>Sociodemographic characteristics</b>               |                           |                              |         |
| <b>Age</b>                                            |                           |                              | < 0.001 |
| Mean (SD)                                             | 53.86 (7.00)              | 66.87 (1.48)                 |         |
| Range                                                 | 38.00 - 64.00             | 65.00 - 73.00                |         |
| <b>Sex</b>                                            |                           |                              | < 0.001 |
| Female                                                | 135 416 (53.2%)           | 24 158 (45.6%)               |         |
| Male                                                  | 118 945 (46.8%)           | 28 859 (54.4%)               |         |
| <b>Ethnicity</b>                                      |                           |                              | < 0.001 |
| White                                                 | 241 835 (95.1%)           | 51 730 (97.6%)               |         |
| Mixed-race                                            | 1 641 (0.6%)              | 125 (0.2%)                   |         |
| Black                                                 | 3 943 (1.6%)              | 314 (0.6%)                   |         |
| Asian                                                 | 4 167 (1.6%)              | 588 (1.1%)                   |         |
| Chinese                                               | 758 (0.3%)                | 60 (0.1%)                    |         |
| Other                                                 | 2 017 (0.8%)              | 200 (0.4%)                   |         |
| <b>Highest qualification</b>                          |                           |                              | < 0.001 |
| None                                                  | 25 954 (10.2%)            | 13 874 (26.2%)               |         |
| O levels/GCSEs/CSEs                                   | 72 006 (28.3%)            | 12 442 (23.5%)               |         |
| A levels/NVQ/HND/HNC <sup>1</sup>                     | 60 115 (23.6%)            | 12 469 (23.5%)               |         |
| Degree                                                | 96 286 (37.9%)            | 14 232 (26.8%)               |         |
| <b>Household income<sup>2</sup></b>                   |                           |                              | < 0.001 |
| Very low                                              | 72 706 (28.6%)            | 9 632 (18.2%)                |         |
| Low                                                   | 42 889 (16.9%)            | 20 210 (38.1%)               |         |
| Medium                                                | 59 348 (23.3%)            | 18 583 (35.1%)               |         |
| High                                                  | 62 369 (24.5%)            | 3 737 (7.0%)                 |         |
| Very high                                             | 17 049 (6.7%)             | 855 (1.6%)                   |         |
| <b>Multiple deprivation</b>                           |                           |                              | < 0.001 |
| Mean (SD)                                             | 16.95 (13.44)             | 15.91 (12.78)                |         |
| Range                                                 | 0.61 - 82.00              | 0.61 - 82.00                 |         |
| <b>Psychosocial factors</b>                           |                           |                              |         |
| <b>Loneliness</b>                                     |                           |                              | < 0.001 |
| Not lonely                                            | 239 515 (94.2%)           | 50 386 (95.0%)               |         |
| Lonely                                                | 14 846 (5.8%)             | 2 631 (5.0%)                 |         |
| <b>Social isolation</b>                               |                           |                              | 0.002   |
| Not isolated                                          | 232 297 (91.3%)           | 48 634 (91.7%)               |         |
| Isolated                                              | 22 064 (8.7%)             | 4 383 (8.3%)                 |         |
| <b>Lifestyle factors</b>                              |                           |                              |         |
| <b>Smoking status</b>                                 |                           |                              | < 0.001 |
| Never                                                 | 142 883 (56.2%)           | 25 592 (48.3%)               |         |
| Former                                                | 84 862 (33.4%)            | 23 776 (44.8%)               |         |
| Current                                               | 26 616 (10.5%)            | 3 649 (6.9%)                 |         |
| <b>Stair climbing frequency</b>                       |                           |                              | < 0.001 |
| None                                                  | 17 222 (6.8%)             | 6 827 (12.9%)                |         |
| 1-5/day                                               | 49 187 (19.3%)            | 9 080 (17.1%)                |         |
| 6-10/day                                              | 96 576 (38.0%)            | 19 406 (36.6%)               |         |
| 11-15/day                                             | 50 249 (19.8%)            | 10 066 (19.0%)               |         |
| 16-20/day                                             | 23 039 (9.1%)             | 4 570 (8.6%)                 |         |
| 20+/day                                               | 18 088 (7.1%)             | 3 068 (5.8%)                 |         |
| <b>Alcohol intake frequency</b>                       |                           |                              | < 0.001 |
| Never                                                 | 66 613 (26.2%)            | 12 164 (22.9%)               |         |
| Special occasions                                     | 16 139 (6.3%)             | 4 284 (8.1%)                 |         |
| 1-3/month                                             | 25 472 (10.0%)            | 6 054 (11.4%)                |         |
| 1-2/week                                              | 28 784 (11.3%)            | 5 014 (9.5%)                 |         |
| 3-4/week                                              | 63 767 (25.1%)            | 11 484 (21.7%)               |         |
| Daily/almost daily                                    | 53 586 (21.1%)            | 14 017 (26.4%)               |         |
| <b>Sleep duration (hours/day)</b>                     |                           |                              | < 0.001 |
| Mean (SD)                                             | 7.13 (1.04)               | 7.32 (1.11)                  |         |
| Range                                                 | 1.00 - 20.00              | 1.00 - 18.00                 |         |
| <b>BMI (kg/m<sup>2</sup>)</b>                         |                           |                              | < 0.001 |

|                                                   |                |                |         |
|---------------------------------------------------|----------------|----------------|---------|
| Mean (SD)                                         | 27.24 (4.75)   | 27.40 (4.25)   |         |
| Range                                             | 12.80 - 67.30  | 12.80 - 56.50  |         |
| <b>Walking</b> (days/week) <sup>3</sup>           |                |                | < 0.001 |
| Mean (SD)                                         | 5.31 (1.97)    | 5.63 (1.78)    |         |
| Range                                             | 0.00 - 7.00    | 0.00 - 7.00    |         |
| <b>Moderate activity</b> (days/week) <sup>3</sup> |                |                | < 0.001 |
| Mean (SD)                                         | 3.52 (2.31)    | 3.93 (2.32)    |         |
| Range                                             | 0.00 - 7.00    | 0.00 - 7.00    |         |
| <b>Vigorous activity</b> (days/week) <sup>3</sup> |                |                | < 0.001 |
| Mean (SD)                                         | 1.89 (1.93)    | 1.80 (1.98)    |         |
| Range                                             | 0.00 - 7.00    | 0.00 - 7.00    |         |
| <b>Environmental exposures</b>                    |                |                |         |
| <b>PM<sub>2.5</sub></b>                           |                |                | < 0.001 |
| Mean (SD)                                         | 9.97 (1.04)    | 9.88 (1.01)    |         |
| Range                                             | 8.17 - 20.19   | 8.17 - 21.25   |         |
| <b>PM<sub>10</sub></b>                            |                |                | < 0.001 |
| Mean (SD)                                         | 16.20 (1.88)   | 16.13 (1.85)   |         |
| Range                                             | 11.78 - 30.65  | 11.78 - 27.62  |         |
| <b>NO<sub>2</sub></b>                             |                |                | < 0.001 |
| Mean (SD)                                         | 26.54 (7.59)   | 25.92 (7.40)   |         |
| Range                                             | 12.93 - 108.49 | 12.93 - 107.07 |         |
| <b>L<sub>den</sub></b>                            |                |                | < 0.001 |
| Mean (SD)                                         | 56.03 (4.25)   | 55.92 (4.21)   |         |
| Range                                             | 51.55 - 89.29  | 51.55 - 86.28  |         |
| <b>Greenspace 1000m</b>                           |                |                | < 0.001 |
| Mean (SD)                                         | 45.27 (21.77)  | 46.69 (21.72)  |         |
| Range                                             | 4.49 - 99.19   | 5.34 - 99.18   |         |

Note: GCSEs = general certificate of secondary education; CSE = certificate of secondary education; NVQ = national vocational qualification; HND = higher national diploma; HNC = higher national certificate; BMI = body mass index; PM = particulate matter; NO<sub>2</sub> = nitrogen dioxide; L<sub>den</sub> = day-evening-night noise level. <sup>1</sup>also includes 'other professional qualifications'. <sup>2</sup>Annual household income groups: very low (<£18,000), low (£18,000–£30,999), middle (£31,000–£51,999), high (£52,000–£100,000) and very high (>£100,000). <sup>3</sup>number of days per week engaging in these activities for 10+ minutes continuously.

**Table S27-S30. Regression tables health status stratified by sex**

Sociodemographic characteristics

| Table S27. Sociodemographic characteristics associated with health status stratified by sex |                  |                         |        |        |                         |        |        |                         |        |                    |                 |
|---------------------------------------------------------------------------------------------|------------------|-------------------------|--------|--------|-------------------------|--------|--------|-------------------------|--------|--------------------|-----------------|
| Term                                                                                        | All participants |                         |        | Male   |                         |        | Female |                         |        | Interaction term   |                 |
|                                                                                             | OR               | Bonferroni-corrected CI |        | OR     | Bonferroni-corrected CI |        | OR     | Bonferroni-corrected CI |        | $p_{\text{Bonf.}}$ | $p_{\text{BH}}$ |
| <b>Household income<sup>1</sup></b>                                                         |                  |                         |        |        |                         |        |        |                         |        |                    |                 |
| Very low                                                                                    | 0.7447           | 0.7148                  | 0.7759 | 0.6953 | 0.6545                  | 0.7386 | 0.7794 | 0.7368                  | 0.8245 | <0.0001            | <0.0001         |
| Low                                                                                         | 0.9196           | 0.8864                  | 0.9541 | 0.9052 | 0.8586                  | 0.9544 | 0.9326 | 0.8858                  | 0.9818 | 0.0006             | 0.0001          |
| Middle                                                                                      | Ref              | –                       | –      | Ref    | –                       | –      | Ref    | –                       | –      | –                  | –               |
| High                                                                                        | 1.0510           | 1.0096                  | 1.0941 | 1.0507 | 0.9934                  | 1.1113 | 1.0438 | 0.9852                  | 1.1060 | 0.4472             | 0.0225          |
| Very high                                                                                   | 1.0472           | 0.9812                  | 1.1181 | 1.0541 | 0.9640                  | 1.1535 | 1.0257 | 0.9327                  | 1.1292 | 0.1482             | 0.0087          |
| <b>Sex</b>                                                                                  |                  |                         |        |        |                         |        |        |                         |        |                    |                 |
| Female                                                                                      | Ref              | –                       | –      | Ref    | –                       | –      | Ref    | –                       | –      | –                  | –               |
| Male                                                                                        | 0.8847           | 0.8610                  | 0.9090 | –      | –                       | –      | –      | –                       | –      | –                  | –               |
| <b>Age</b>                                                                                  | 0.9528           | 0.9510                  | 0.9546 | 0.9441 | 0.9414                  | 0.9467 | 0.9608 | 0.9583                  | 0.9634 | <0.0001            | <0.0001         |
| <b>Multiple deprivation</b>                                                                 | 0.9952           | 0.9941                  | 0.9963 | 0.9943 | 0.9927                  | 0.9959 | 0.9962 | 0.9946                  | 0.9977 | <0.0001            | <0.0001         |
| <b>Ethnicity</b>                                                                            |                  |                         |        |        |                         |        |        |                         |        |                    |                 |
| White                                                                                       | Ref              | –                       | –      | Ref    | –                       | –      | Ref    | –                       | –      | –                  | –               |
| Mixed-race                                                                                  | 1.1037           | 0.9221                  | 1.3273 | 1.0296 | 0.7706                  | 1.3907 | 1.1729 | 0.9339                  | 1.4851 | >0.9999            | 0.6739          |
| Asian                                                                                       | 1.0188           | 0.9149                  | 1.1359 | 0.9194 | 0.7985                  | 1.0605 | 1.1865 | 1.0024                  | 1.4096 | 0.1043             | 0.0065          |
| Black                                                                                       | 1.3125           | 1.1657                  | 1.4805 | 1.3079 | 1.0905                  | 1.5754 | 1.3178 | 1.1274                  | 1.5455 | >0.9999            | 0.9911          |
| Chinese                                                                                     | 1.8339           | 1.3646                  | 2.5106 | 1.7054 | 1.0800                  | 2.8050 | 1.9827 | 1.3537                  | 3.0032 | >0.9999            | 0.8143          |
| Other                                                                                       | 1.2570           | 1.0727                  | 1.4779 | 1.3268 | 1.0478                  | 1.6919 | 1.2131 | 0.9805                  | 1.5104 | >0.9999            | 0.3444          |
| <b>Highest qualification</b>                                                                |                  |                         |        |        |                         |        |        |                         |        |                    |                 |
| None                                                                                        | Ref              | –                       | –      | Ref    | –                       | –      | Ref    | –                       | –      | –                  | –               |
| O levels/GCSEs/CSEs                                                                         | 1.0315           | 0.9870                  | 1.0779 | 0.9946 | 0.9330                  | 1.0603 | 1.0482 | 0.9858                  | 1.1146 | 0.0078             | 0.0006          |
| A levels/NVQ/HND/HNC <sup>2</sup>                                                           | 0.9879           | 0.9445                  | 1.0332 | 0.9710 | 0.9114                  | 1.0344 | 1.0033 | 0.9410                  | 1.0697 | 0.0037             | 0.0004          |
| Degree                                                                                      | 0.9558           | 0.9137                  | 0.9997 | 0.9400 | 0.8816                  | 1.0021 | 0.9624 | 0.9029                  | 1.0257 | <0.0001            | <0.0001         |

*Note:* Estimates from Model 4 (i.e. including all explanatory variables). Bonferroni-adjusted (~99.9%) confidence intervals. OR = odds ratio; CI = confidence interval; GCSEs = general certificate of secondary education; CSE = certificate of secondary education; NVQ = national vocational qualification; HND = higher national diploma; HNC = higher national certificate. <sup>1</sup>Annual household income groups: very low (<£18,000), low (£18,000–£30,999), middle (£31,000–£51,999), high (£52,000–£100,000) and very high (>£100,000). <sup>2</sup>also includes 'other professional qualifications'.

Psychosocial factors

| Table S28. Psychosocial factors associated with health status stratified by sex |                  |                         |        |        |                         |        |        |                         |        |                  |          |
|---------------------------------------------------------------------------------|------------------|-------------------------|--------|--------|-------------------------|--------|--------|-------------------------|--------|------------------|----------|
| Term                                                                            | All participants |                         |        | Male   |                         |        | Female |                         |        | Interaction term |          |
|                                                                                 | OR               | Bonferroni-corrected CI |        | OR     | Bonferroni-corrected CI |        | OR     | Bonferroni-corrected CI |        | $p_{Bonf.}$      | $p_{BH}$ |
| <b>Loneliness</b>                                                               |                  |                         |        |        |                         |        |        |                         |        |                  |          |
| Not lonely                                                                      | Ref              | –                       | –      | Ref    | –                       | –      | Ref    | –                       | –      | –                | –        |
| Lonely                                                                          | 0.8129           | 0.7697                  | 0.8587 | 0.7688 | 0.7112                  | 0.8313 | 0.8538 | 0.7904                  | 0.9227 | 0.0083           | 0.0006   |
| <b>Social isolation</b>                                                         |                  |                         |        |        |                         |        |        |                         |        |                  |          |
| Not isolated                                                                    | Ref              | –                       | –      | Ref    | –                       | –      | Ref    | –                       | –      | –                | –        |
| Isolated                                                                        | 0.9496           | 0.9067                  | 0.9947 | 0.9307 | 0.8711                  | 0.9946 | 0.9653 | 0.9044                  | 1.0306 | 0.0818           | 0.0055   |

Note: Estimates from Model 4 (i.e. including all explanatory variables). Bonferroni-adjusted (~99.9%) confidence intervals. OR = odds ratio; CI = confidence interval.

## Lifestyle factors

Table S29. Lifestyle factors associated with health status stratified by sex

| Term                                              | All participants |                         |        | Male   |                         |        | Female |                         |        | Interaction term   |                 |
|---------------------------------------------------|------------------|-------------------------|--------|--------|-------------------------|--------|--------|-------------------------|--------|--------------------|-----------------|
|                                                   | OR               | Bonferroni-corrected CI |        | OR     | Bonferroni-corrected CI |        | OR     | Bonferroni-corrected CI |        | $p_{\text{Bonf.}}$ | $p_{\text{BH}}$ |
| <b>Sleep duration</b> (hours/day)                 | 0.9748           | 0.9631                  | 0.9868 | 0.9635 | 0.9465                  | 0.9808 | 0.9947 | 0.9782                  | 1.0116 | <0.0001            | <0.0001         |
| <b>Physical activity</b> (days/week) <sup>1</sup> |                  |                         |        |        |                         |        |        |                         |        |                    |                 |
| Walking                                           | 1.0105           | 1.0032                  | 1.0178 | 1.0062 | 0.9960                  | 1.0164 | 1.0160 | 1.0055                  | 1.0266 | >0.9999            | 0.1722          |
| Moderate activity                                 | 1.0032           | 0.9964                  | 1.0100 | 1.0093 | 0.9992                  | 1.0195 | 0.9979 | 0.9887                  | 1.0071 | 0.8784             | 0.0351          |
| Vigorous activity                                 | 1.0319           | 1.0238                  | 1.0400 | 1.0319 | 1.0205                  | 1.0433 | 1.0279 | 1.0164                  | 1.0395 | 0.0064             | 0.0006          |
| <b>Stair climbing frequency</b>                   |                  |                         |        |        |                         |        |        |                         |        |                    |                 |
| None                                              | Ref              | –                       | –      | Ref    | –                       | –      | Ref    | –                       | –      | –                  | –               |
| 1-5/day                                           | 1.0704           | 1.0148                  | 1.1289 | 1.0604 | 0.9827                  | 1.1442 | 1.0778 | 0.9998                  | 1.1617 | >0.9999            | 0.1995          |
| 6-10/day                                          | 1.1756           | 1.1188                  | 1.2352 | 1.1657 | 1.0854                  | 1.2517 | 1.1836 | 1.1044                  | 1.2683 | 0.5750             | 0.0261          |
| 11-15/day                                         | 1.1714           | 1.1098                  | 1.2363 | 1.1553 | 1.0684                  | 1.2491 | 1.1898 | 1.1038                  | 1.2823 | 0.6537             | 0.0284          |
| 16-20/day                                         | 1.1650           | 1.0937                  | 1.2410 | 1.1425 | 1.0422                  | 1.2525 | 1.1971 | 1.0971                  | 1.3063 | >0.9999            | 0.1028          |
| 20+/day                                           | 1.1881           | 1.1097                  | 1.2723 | 1.2364 | 1.1172                  | 1.3688 | 1.1660 | 1.0627                  | 1.2797 | 0.0004             | <0.0001         |
| <b>Alcohol intake frequency</b>                   |                  |                         |        |        |                         |        |        |                         |        |                    |                 |
| Never                                             | 0.6285           | 0.5946                  | 0.6644 | 0.6097 | 0.5586                  | 0.6656 | 0.6279 | 0.5842                  | 0.6749 | 0.7799             | 0.0325          |
| Special occasions                                 | 0.7792           | 0.7429                  | 0.8174 | 0.7591 | 0.7003                  | 0.8231 | 0.7720 | 0.7270                  | 0.8199 | >0.9999            | 0.0621          |
| 1-3/month                                         | 0.9129           | 0.8708                  | 0.9570 | 0.8829 | 0.8204                  | 0.9503 | 0.9244 | 0.8689                  | 0.9836 | >0.9999            | 0.1105          |
| 1-2/week                                          | Ref              | –                       | –      | Ref    | –                       | –      | Ref    | –                       | –      | –                  | –               |
| 3-4/week                                          | 1.0590           | 1.0198                  | 1.0998 | 1.0837 | 1.0280                  | 1.1424 | 1.0342 | 0.9794                  | 1.0922 | 0.4505             | 0.0225          |
| Daily/almost daily                                | 1.0334           | 0.9939                  | 1.0745 | 1.0604 | 1.0054                  | 1.1183 | 0.9982 | 0.9419                  | 1.0579 | >0.9999            | 0.0392          |
| <b>BMI</b> (kg/m <sup>2</sup> )                   | 0.9683           | 0.9656                  | 0.9711 | 0.9564 | 0.9520                  | 0.9608 | 0.9746 | 0.9711                  | 0.9782 | <0.0001            | <0.0001         |
| <b>Smoking status</b>                             |                  |                         |        |        |                         |        |        |                         |        |                    |                 |
| Never                                             | Ref              | –                       | –      | Ref    | –                       | –      | Ref    | –                       | –      | –                  | –               |
| Former                                            | 0.7922           | 0.7698                  | 0.8152 | 0.7694 | 0.7384                  | 0.8018 | 0.8366 | 0.8036                  | 0.8711 | <0.0001            | <0.0001         |
| Current                                           | 0.7518           | 0.7183                  | 0.7869 | 0.7812 | 0.7337                  | 0.8321 | 0.7188 | 0.6725                  | 0.7685 | 0.0747             | 0.0053          |

Note: Estimates from Model 4 (i.e. including all explanatory variables). Bonferroni-adjusted (~99.9%) confidence intervals. OR = odds ratio; CI = confidence interval; BMI = body mass index. <sup>1</sup>number of days per week engaging in these activities for 10+ minutes continuously.

Environmental exposures

**Table S30. Environmental exposures associated with health status stratified by sex**

| Term                    | All participants |                         |        | Male   |                         |        | Female |                         |        | Interaction term          |                        |
|-------------------------|------------------|-------------------------|--------|--------|-------------------------|--------|--------|-------------------------|--------|---------------------------|------------------------|
|                         | OR               | Bonferroni-corrected CI |        | OR     | Bonferroni-corrected CI |        | OR     | Bonferroni-corrected CI |        | <i>p</i> <sub>Bonf.</sub> | <i>p</i> <sub>BH</sub> |
| <b>PM<sub>2.5</sub></b> | 0.9656           | 0.9411                  | 0.9908 | 0.9614 | 0.9266                  | 0.9976 | 0.9690 | 0.9347                  | 1.0045 | 0.1946                    | 0.0108                 |
| <b>PM<sub>10</sub></b>  | 1.0019           | 0.9935                  | 1.0104 | 1.0012 | 0.9892                  | 1.0134 | 1.0029 | 0.9911                  | 1.0148 | >0.9999                   | 0.1722                 |
| <b>NO<sub>2</sub></b>   | 1.0036           | 0.9993                  | 1.0078 | 1.0010 | 0.9949                  | 1.0071 | 1.0060 | 1.0001                  | 1.0120 | 0.4953                    | 0.0236                 |
| <b>L<sub>den</sub></b>  | 0.9981           | 0.9945                  | 1.0017 | 1.0009 | 0.9957                  | 1.0061 | 0.9955 | 0.9905                  | 1.0005 | >0.9999                   | 0.5176                 |
| <b>Greenspace 1000m</b> | 0.9995           | 0.9985                  | 1.0004 | 0.9986 | 0.9973                  | 1.0000 | 1.0003 | 0.9989                  | 1.0017 | >0.9999                   | 0.7593                 |

*Note:* Estimates from Model 4 (i.e. including all explanatory variables). Bonferroni-adjusted (~99.9%) confidence intervals. OR = odds ratio; CI = confidence interval; PM = particulate matter; NO<sub>2</sub> = nitrogen dioxide; L<sub>den</sub> = day-evening-night noise level.

**Figures S7-S9. Confidence interval plots health status stratified by sex**

Sociodemographic and psychosocial factors

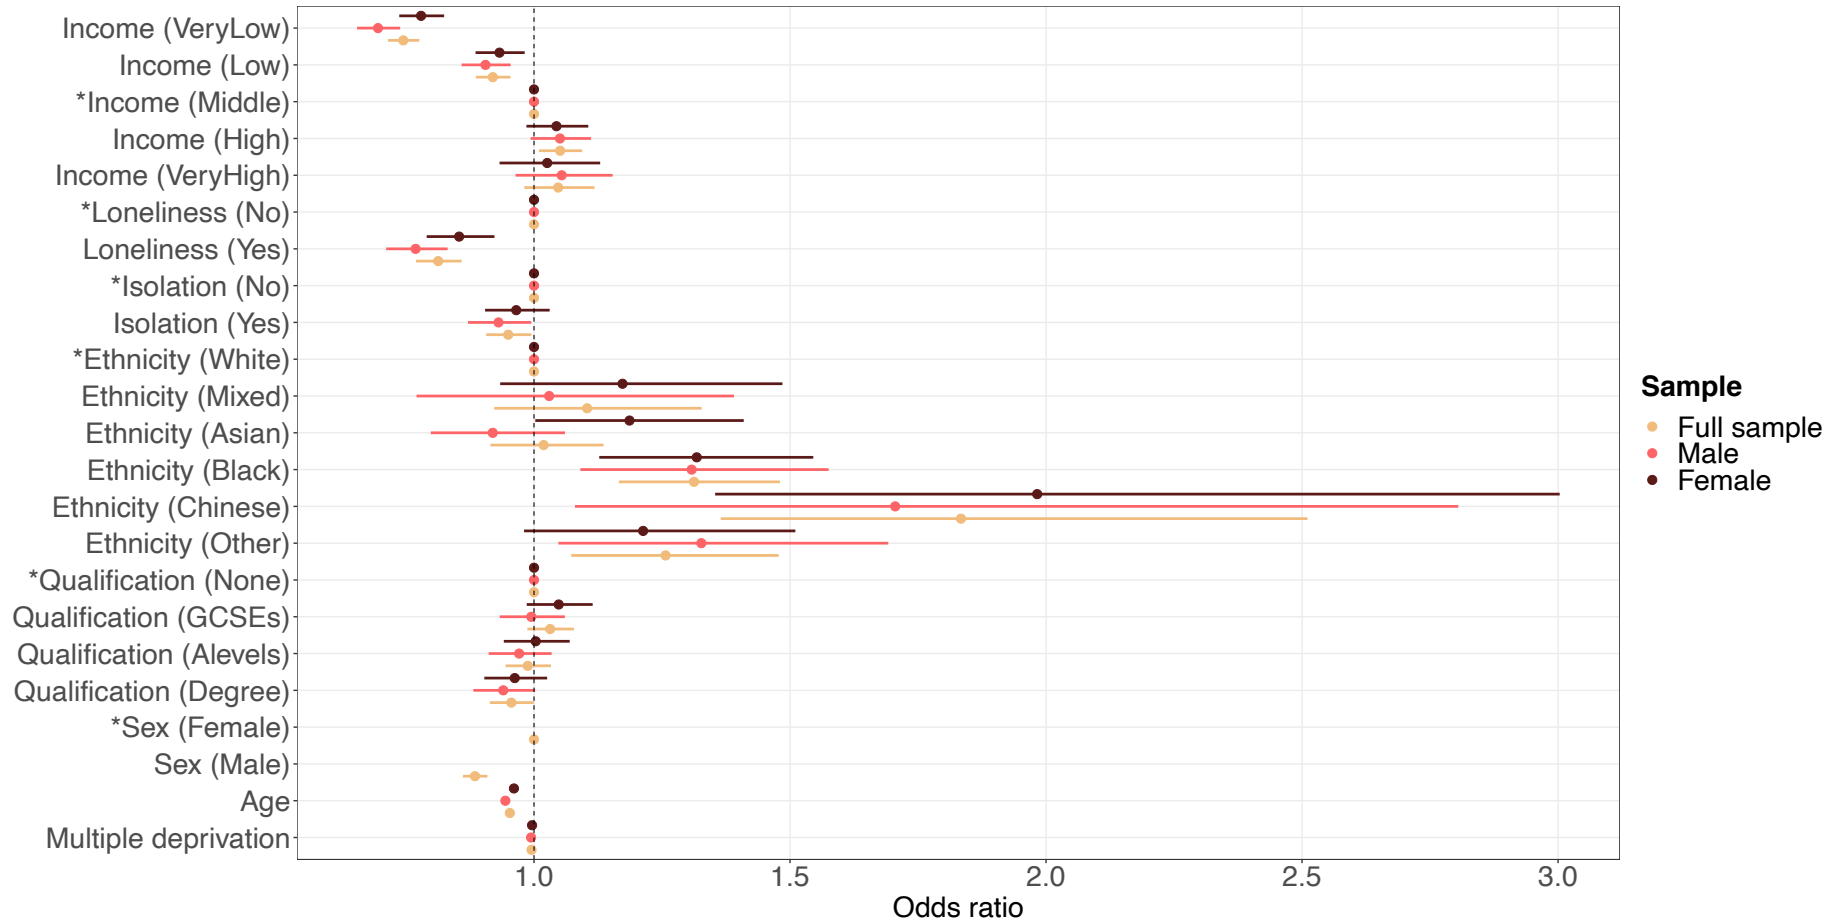

**Figure S7.** Sociodemographic characteristics and psychosocial factors associated with health status, stratified by sex. Confidence interval plot (odds ratio  $\pm$  Bonferroni-adjusted (~99.9%) confidence intervals) for Model 4 (i.e. including all explanatory variables). GCSEs = general certificate of secondary education. \*Indicates reference group for categorical explanatory variables. Annual household income groups: very low (<£18,000), low (£18,000–£30,999), middle (£31,000–£51,999), high (£52,000–£100,000) and very high (>£100,000). 'GCSEs' also includes O levels and certificate of secondary education (CSE). 'A levels' also includes national vocational qualification (NVQ), higher national diploma (HND), higher national certificate (HNC) and 'other professional qualifications'.

Lifestyle factors

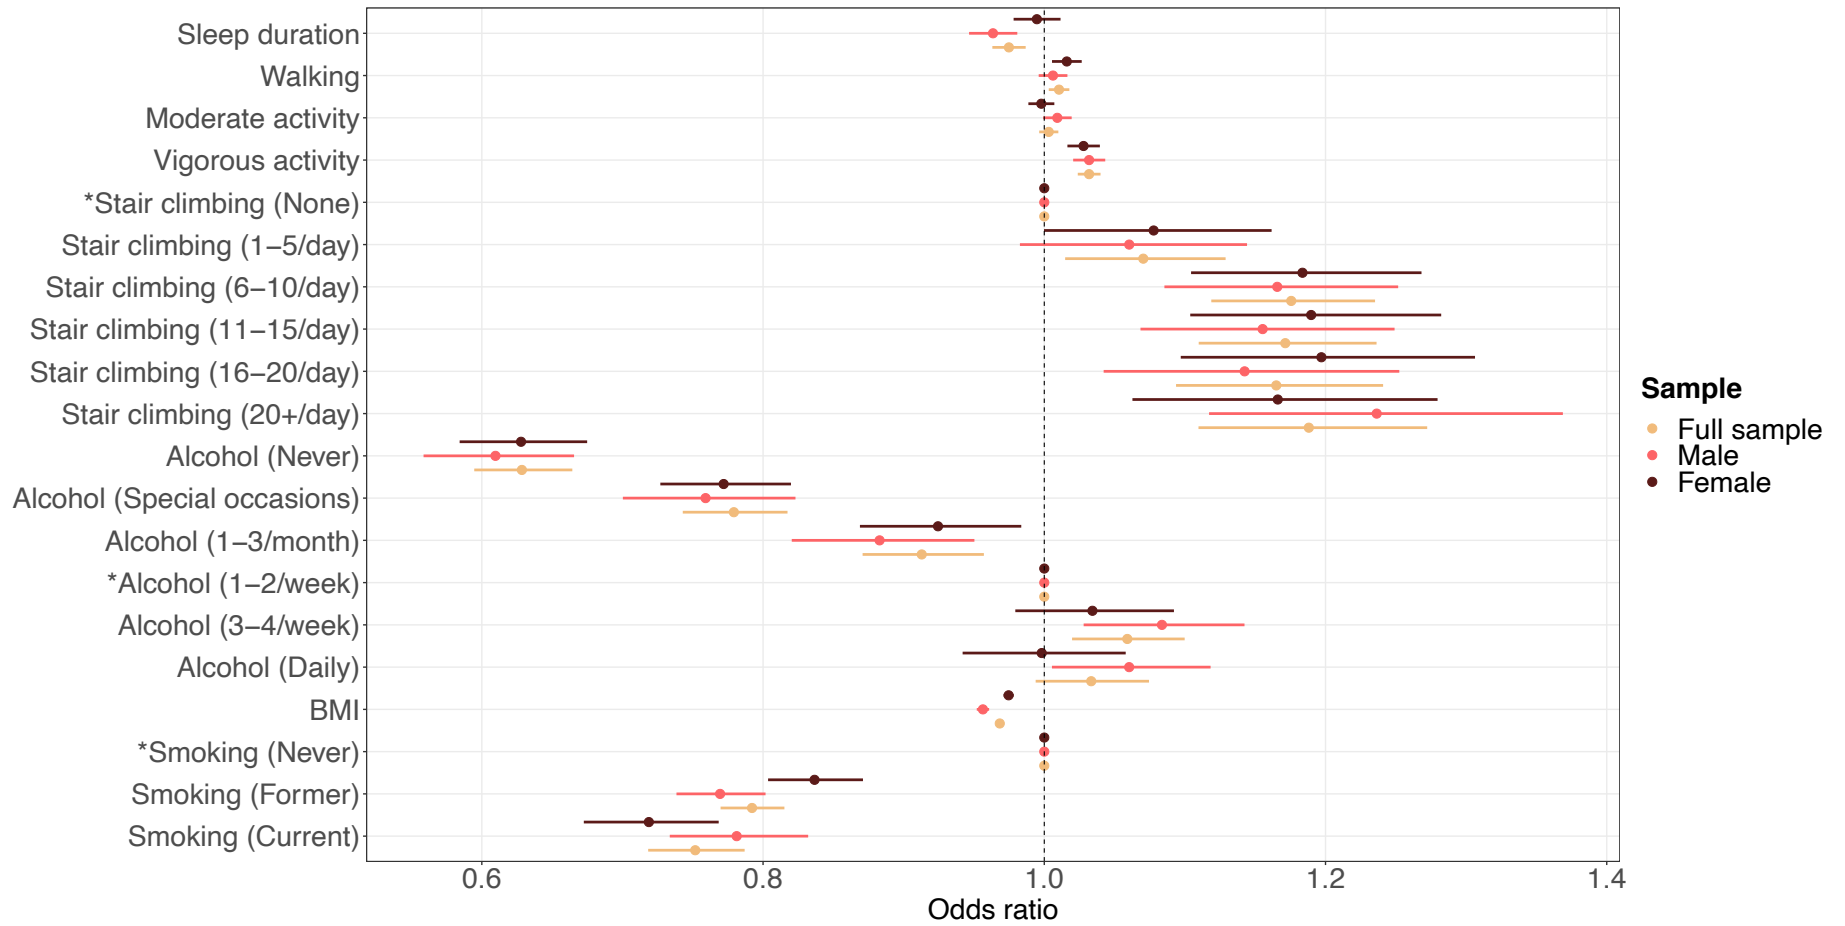

**Figure S8.** Lifestyle factors associated with health status, stratified by sex. Confidence interval plot (odds ratio  $\pm$  Bonferroni-adjusted (~99.9%) confidence intervals) for Model 4 (i.e. including all explanatory variables). BMI = body mass index. \*Indicates reference group for categorical explanatory variables.



Environmental exposures

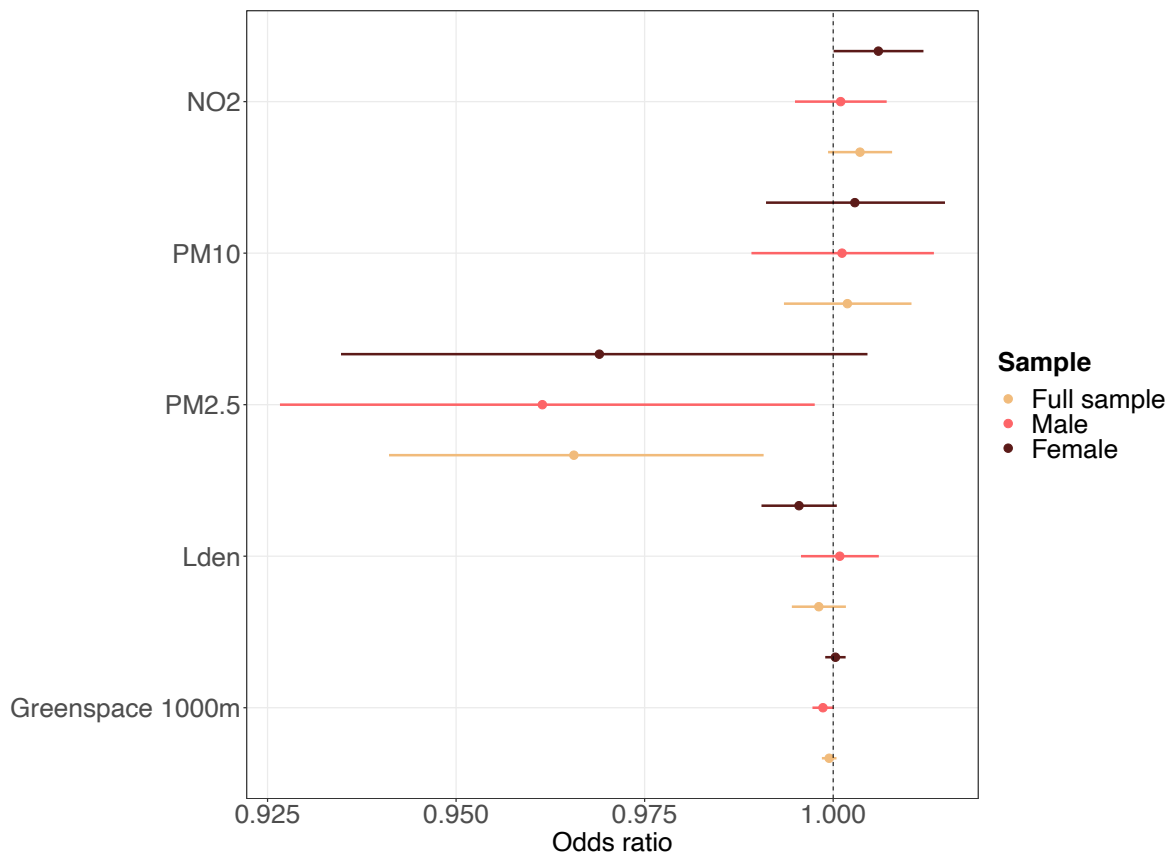

**Figure S9.** Environmental exposures associated with health status, stratified by sex. Confidence interval plot (odds ratio  $\pm$  Bonferroni-adjusted ( $\sim 99.9\%$ ) confidence intervals) for Model 4 (i.e. including all explanatory variables). PM = particulate matter; NO<sub>2</sub> = nitrogen dioxide; L<sub>den</sub> = day-evening-night noise level.

**Tables S31-S34. Regression tables health status stratified by age**

Sociodemographic characteristics

**Table S31. Sociodemographic characteristics associated with health status stratified by age**

| Term                                | All participants |                         |        | Below 65 |                         |        | 65 and above |                         |        | Interaction term          |                        |
|-------------------------------------|------------------|-------------------------|--------|----------|-------------------------|--------|--------------|-------------------------|--------|---------------------------|------------------------|
|                                     | OR               | Bonferroni-corrected CI |        | OR       | Bonferroni-corrected CI |        | OR           | Bonferroni-corrected CI |        | <i>p</i> <sub>Bonf.</sub> | <i>p</i> <sub>BH</sub> |
| <b>Household income<sup>1</sup></b> |                  |                         |        |          |                         |        |              |                         |        |                           |                        |
| Very low                            | 0.7447           | 0.7148                  | 0.7759 | 0.7132   | 0.6807                  | 0.7471 | 0.8509       | 0.7764                  | 0.9326 | <0.0001                   | <0.0001                |
| Low                                 | 0.9196           | 0.8864                  | 0.9541 | 0.9249   | 0.8875                  | 0.9639 | 0.9432       | 0.8666                  | 1.0264 | >0.9999                   | 0.7976                 |
| Middle                              | Ref              | –                       | –      | Ref      | –                       | –      | Ref          | –                       | –      | –                         | –                      |
| High                                | 1.0510           | 1.0096                  | 1.0941 | 1.0509   | 1.0070                  | 1.0967 | 0.9563       | 0.8415                  | 1.0872 | 0.2171                    | 0.0155                 |
| Very high                           | 1.0472           | 0.9812                  | 1.1181 | 1.0428   | 0.9741                  | 1.1169 | 0.9791       | 0.7734                  | 1.2424 | >0.9999                   | 0.2886                 |
| <b>Sex</b>                          |                  |                         |        |          |                         |        |              |                         |        |                           |                        |
| Female                              | Ref              | –                       | –      | Ref      | –                       | –      | Ref          | –                       | –      | –                         | –                      |
| Male                                | 0.8847           | 0.8610                  | 0.9090 | 0.9270   | 0.8992                  | 0.9557 | 0.7548       | 0.7101                  | 0.8023 | <0.0001                   | <0.0001                |
| <b>Age</b>                          | 0.9528           | 0.9510                  | 0.9546 | 0.9553   | 0.9530                  | 0.9575 | 0.9436       | 0.9255                  | 0.9620 | –                         | –                      |
| <b>Multiple deprivation</b>         | 0.9952           | 0.9941                  | 0.9963 | 0.9951   | 0.9939                  | 0.9963 | 0.9958       | 0.9933                  | 0.9984 | >0.9999                   | 0.1995                 |
| <b>Ethnicity</b>                    |                  |                         |        |          |                         |        |              |                         |        |                           |                        |
| White                               | Ref              | –                       | –      | Ref      | –                       | –      | Ref          | –                       | –      | –                         | –                      |
| Mixed-race                          | 1.1037           | 0.9221                  | 1.3273 | 1.1227   | 0.9296                  | 1.3634 | 1.0573       | 0.5866                  | 1.9315 | >0.9999                   | 0.6005                 |
| Asian                               | 1.0188           | 0.9149                  | 1.1359 | 1.0654   | 0.9472                  | 1.2003 | 0.8668       | 0.6575                  | 1.1426 | <0.0001                   | <0.0001                |
| Black                               | 1.3125           | 1.1657                  | 1.4805 | 1.3410   | 1.1832                  | 1.5233 | 1.2654       | 0.8693                  | 1.8516 | >0.9999                   | 0.9840                 |
| Chinese                             | 1.8339           | 1.3646                  | 2.5106 | 1.8577   | 1.3604                  | 2.5919 | 1.9177       | 0.7868                  | 5.2841 | >0.9999                   | 0.7976                 |
| Other                               | 1.2570           | 1.0727                  | 1.4779 | 1.2936   | 1.0925                  | 1.5381 | 1.1064       | 0.6937                  | 1.7755 | >0.9999                   | 0.0544                 |
| <b>Highest qualification</b>        |                  |                         |        |          |                         |        |              |                         |        |                           |                        |
| None                                | Ref              | –                       | –      | Ref      | –                       | –      | Ref          | –                       | –      | –                         | –                      |
| O levels/GCSEs/CSEs                 | 1.0315           | 0.9870                  | 1.0779 | 1.0315   | 0.9786                  | 1.0873 | 1.0540       | 0.9688                  | 1.1466 | >0.9999                   | 0.1995                 |
| A levels/NVQ/HND/HNC <sup>2</sup>   | 0.9879           | 0.9445                  | 1.0332 | 0.9907   | 0.9388                  | 1.0454 | 1.0009       | 0.9197                  | 1.0892 | 0.8449                    | 0.0422                 |
| Degree                              | 0.9558           | 0.9137                  | 0.9997 | 0.9517   | 0.9022                  | 1.0039 | 1.0103       | 0.9246                  | 1.1040 | 0.8264                    | 0.0422                 |

*Note:* Estimates from Model 4 (i.e. including all explanatory variables). Bonferroni-adjusted (~99.9%) confidence intervals. OR = odds ratio; CI = confidence interval; GCSEs = general certificate of secondary education; CSE = certificate of secondary education; NVQ = national vocational qualification; HND = higher national diploma; HNC = higher national certificate. <sup>1</sup>Annual household income groups: very low (<£18,000), low (£18,000–£30,999), middle (£31,000–£51,999), high (£52,000–£100,000) and very high (>£100,000). <sup>2</sup>also includes 'other professional qualifications'.

Psychosocial factors

| Table S32. Psychosocial factors associated with health status stratified by age |                  |                         |        |          |                         |        |              |                         |        |                    |                 |
|---------------------------------------------------------------------------------|------------------|-------------------------|--------|----------|-------------------------|--------|--------------|-------------------------|--------|--------------------|-----------------|
| Term                                                                            | All participants |                         |        | Below 65 |                         |        | 65 and above |                         |        | Interaction term   |                 |
|                                                                                 | OR               | Bonferroni-corrected CI |        | OR       | Bonferroni-corrected CI |        | OR           | Bonferroni-corrected CI |        | $p_{\text{Bonf.}}$ | $p_{\text{BH}}$ |
| <b>Loneliness</b>                                                               |                  |                         |        |          |                         |        |              |                         |        |                    |                 |
| Not lonely                                                                      | Ref              | –                       | –      | Ref      | –                       | –      | Ref          | –                       | –      | –                  | –               |
| Lonely                                                                          | 0.8129           | 0.7697                  | 0.8587 | 0.7959   | 0.7497                  | 0.8452 | 0.8958       | 0.7844                  | 1.0231 | 0.3908             | 0.0244          |
| <b>Social isolation</b>                                                         |                  |                         |        |          |                         |        |              |                         |        |                    |                 |
| Not isolated                                                                    | Ref              | –                       | –      | Ref      | –                       | –      | Ref          | –                       | –      | –                  | –               |
| Isolated                                                                        | 0.9496           | 0.9067                  | 0.9947 | 0.9443   | 0.8970                  | 0.9942 | 0.9625       | 0.8650                  | 1.0711 | 0.0112             | 0.0009          |

Note: Estimates from Model 4 (i.e. including all explanatory variables). Bonferroni-adjusted (~99.9%) confidence intervals. OR = odds ratio; CI = confidence interval.

## Lifestyle factors

| Table S33. Lifestyle factors associated with health status stratified by age |                  |                         |        |          |                         |        |              |                         |        |                    |                 |
|------------------------------------------------------------------------------|------------------|-------------------------|--------|----------|-------------------------|--------|--------------|-------------------------|--------|--------------------|-----------------|
| Term                                                                         | All participants |                         |        | Below 65 |                         |        | 65 and above |                         |        | Interaction term   |                 |
|                                                                              | OR               | Bonferroni-corrected CI |        | OR       | Bonferroni-corrected CI |        | OR           | Bonferroni-corrected CI |        | $p_{\text{Bonf.}}$ | $p_{\text{BH}}$ |
| <b>Sleep duration</b> (hours/day)                                            | 0.9748           | 0.9631                  | 0.9868 | 0.9784   | 0.9650                  | 0.9920 | 0.9787       | 0.9537                  | 1.0043 | >0.9999            | 0.1995          |
| <b>Physical activity</b> (days/week) <sup>1</sup>                            |                  |                         |        |          |                         |        |              |                         |        |                    |                 |
| Walking                                                                      | 1.0105           | 1.0032                  | 1.0178 | 1.0084   | 1.0003                  | 1.0165 | 1.0242       | 1.0067                  | 1.0421 | <0.0001            | <0.0001         |
| Moderate activity                                                            | 1.0032           | 0.9964                  | 1.0100 | 1.0026   | 0.9949                  | 1.0103 | 1.0057       | 0.9913                  | 1.0204 | >0.9999            | 0.1763          |
| Vigorous activity                                                            | 1.0319           | 1.0238                  | 1.0400 | 1.0338   | 1.0246                  | 1.0432 | 1.0241       | 1.0075                  | 1.0410 | >0.9999            | 0.1536          |
| <b>Stair climbing frequency</b>                                              |                  |                         |        |          |                         |        |              |                         |        |                    |                 |
| None                                                                         | Ref              | –                       | –      | Ref      | –                       | –      | Ref          | –                       | –      | –                  | –               |
| 1-5/day                                                                      | 1.0704           | 1.0148                  | 1.1289 | 1.1064   | 1.0395                  | 1.1774 | 0.9614       | 0.8649                  | 1.0686 | <0.0001            | <0.0001         |
| 6-10/day                                                                     | 1.1756           | 1.1188                  | 1.2352 | 1.2041   | 1.1355                  | 1.2766 | 1.1106       | 1.0115                  | 1.2194 | <0.0001            | <0.0001         |
| 11-15/day                                                                    | 1.1714           | 1.1098                  | 1.2363 | 1.1985   | 1.1249                  | 1.2767 | 1.1195       | 1.0079                  | 1.2434 | 0.0004             | <0.0001         |
| 16-20/day                                                                    | 1.1650           | 1.0937                  | 1.2410 | 1.1772   | 1.0942                  | 1.2665 | 1.1735       | 1.0324                  | 1.3343 | 0.4709             | 0.0277          |
| 20+/day                                                                      | 1.1881           | 1.1097                  | 1.2723 | 1.2150   | 1.1236                  | 1.3139 | 1.1410       | 0.9861                  | 1.3210 | 0.0128             | 0.0010          |
| <b>Alcohol intake frequency</b>                                              |                  |                         |        |          |                         |        |              |                         |        |                    |                 |
| Never                                                                        | 0.6285           | 0.5946                  | 0.6644 | 0.6145   | 0.5772                  | 0.6543 | 0.6783       | 0.6023                  | 0.7636 | 0.0021             | 0.0002          |
| Special occasions                                                            | 0.7792           | 0.7429                  | 0.8174 | 0.7720   | 0.7317                  | 0.8146 | 0.8078       | 0.7273                  | 0.8972 | 0.0052             | 0.0005          |
| 1-3/month                                                                    | 0.9129           | 0.8708                  | 0.9570 | 0.9015   | 0.8557                  | 0.9499 | 0.9684       | 0.8669                  | 1.0820 | >0.9999            | 0.0775          |
| 1-2/week                                                                     | Ref              | –                       | –      | Ref      | –                       | –      | Ref          | –                       | –      | –                  | –               |
| 3-4/week                                                                     | 1.0590           | 1.0198                  | 1.0998 | 1.0552   | 1.0117                  | 1.1006 | 1.0730       | 0.9841                  | 1.1698 | >0.9999            | 0.2894          |
| Daily/almost daily                                                           | 1.0334           | 0.9939                  | 1.0745 | 1.0310   | 0.9864                  | 1.0776 | 1.0607       | 0.9751                  | 1.1538 | >0.9999            | 0.1995          |
| <b>BMI</b> (kg/m <sup>2</sup> )                                              | 0.9683           | 0.9656                  | 0.9711 | 0.9694   | 0.9663                  | 0.9724 | 0.9625       | 0.9557                  | 0.9693 | <0.0001            | <0.0001         |
| <b>Smoking status</b>                                                        |                  |                         |        |          |                         |        |              |                         |        |                    |                 |
| Never                                                                        | Ref              | –                       | –      | Ref      | –                       | –      | Ref          | –                       | –      | –                  | –               |
| Former                                                                       | 0.7922           | 0.7698                  | 0.8152 | 0.8054   | 0.7796                  | 0.8320 | 0.7632       | 0.7175                  | 0.8117 | <0.0001            | <0.0001         |
| Current                                                                      | 0.7518           | 0.7183                  | 0.7869 | 0.7423   | 0.7066                  | 0.7799 | 0.8400       | 0.7460                  | 0.9459 | 0.6816             | 0.0379          |

Note: Estimates from Model 4 (i.e. including all explanatory variables). Bonferroni-adjusted (~99.9%) confidence intervals. OR = odds ratio; CI = confidence interval; BMI = body mass index. <sup>1</sup>number of days per week engaging in these activities for 10+ minutes continuously.

Environmental exposures

| Table S34. Environmental exposures associated with health status stratified by age |                  |                         |        |          |                         |        |              |                         |        |                    |                 |
|------------------------------------------------------------------------------------|------------------|-------------------------|--------|----------|-------------------------|--------|--------------|-------------------------|--------|--------------------|-----------------|
| Term                                                                               | All participants |                         |        | Below 65 |                         |        | 65 and above |                         |        | Interaction term   |                 |
|                                                                                    | OR               | Bonferroni-corrected CI |        | OR       | Bonferroni-corrected CI |        | OR           | Bonferroni-corrected CI |        | $p_{\text{Bonf.}}$ | $p_{\text{BH}}$ |
| <b>PM<sub>2.5</sub></b>                                                            | 0.9656           | 0.9411                  | 0.9908 | 0.9641   | 0.9367                  | 0.9922 | 0.9640       | 0.9099                  | 1.0213 | >0.9999            | 0.2963          |
| <b>PM<sub>10</sub></b>                                                             | 1.0019           | 0.9935                  | 1.0104 | 1.0006   | 0.9912                  | 1.0101 | 1.0064       | 0.9876                  | 1.0255 | >0.9999            | 0.2092          |
| <b>NO<sub>2</sub></b>                                                              | 1.0036           | 0.9993                  | 1.0078 | 1.0037   | 0.9990                  | 1.0085 | 1.0043       | 0.9949                  | 1.0138 | >0.9999            | 0.8340          |
| <b>L<sub>den</sub></b>                                                             | 0.9981           | 0.9945                  | 1.0017 | 0.9990   | 0.9950                  | 1.0030 | 0.9946       | 0.9866                  | 1.0026 | 0.3084             | 0.0206          |
| <b>Greenspace 1000m</b>                                                            | 0.9995           | 0.9985                  | 1.0004 | 0.9995   | 0.9984                  | 1.0006 | 0.9994       | 0.9972                  | 1.0015 | >0.9999            | 0.2912          |

Note: Estimates from Model 4 (i.e. including all explanatory variables). Bonferroni-adjusted (~99.9%) confidence intervals. OR = odds ratio; CI = confidence interval; PM = particulate matter; NO<sub>2</sub> = nitrogen dioxide; L<sub>den</sub> = day-evening-night noise level.

Figures S10-S12. Confidence interval plots health status stratified by age

Sociodemographic and psychosocial factors

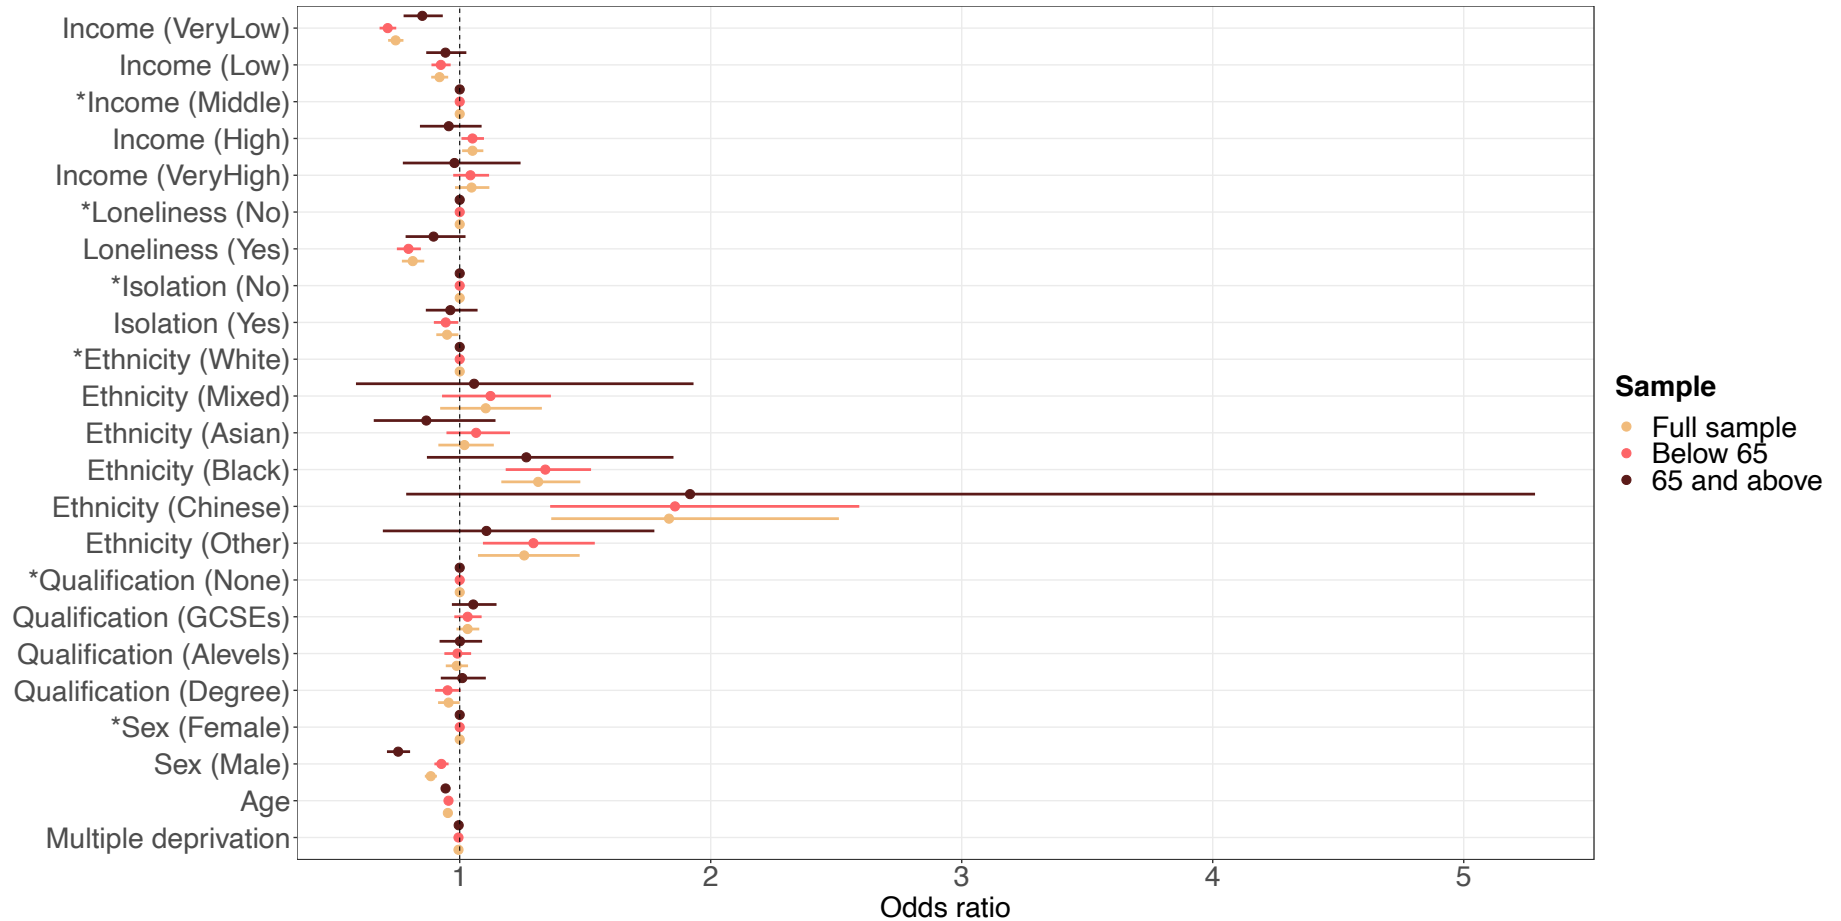

**Figure S10.** Sociodemographic characteristics and psychosocial factors associated with health status, stratified by age. Confidence interval plot (odds ratio  $\pm$  Bonferroni-adjusted (~99.9%) confidence intervals) for Model 4 (i.e. including all explanatory variables). GCSEs = general certificate of secondary education. \*Indicates reference group for categorical explanatory variables. Annual household income groups: very low (<£18,000), low (£18,000–£30,999), middle (£31,000–£51,999), high (£52,000–£100,000) and very high (>£100,000). 'GCSEs' also includes O levels and certificate of secondary education (CSE). 'A levels' also includes national vocational qualification (NVQ), higher national diploma (HND), higher national certificate (HNC) and 'other professional qualifications'.

Lifestyle factors

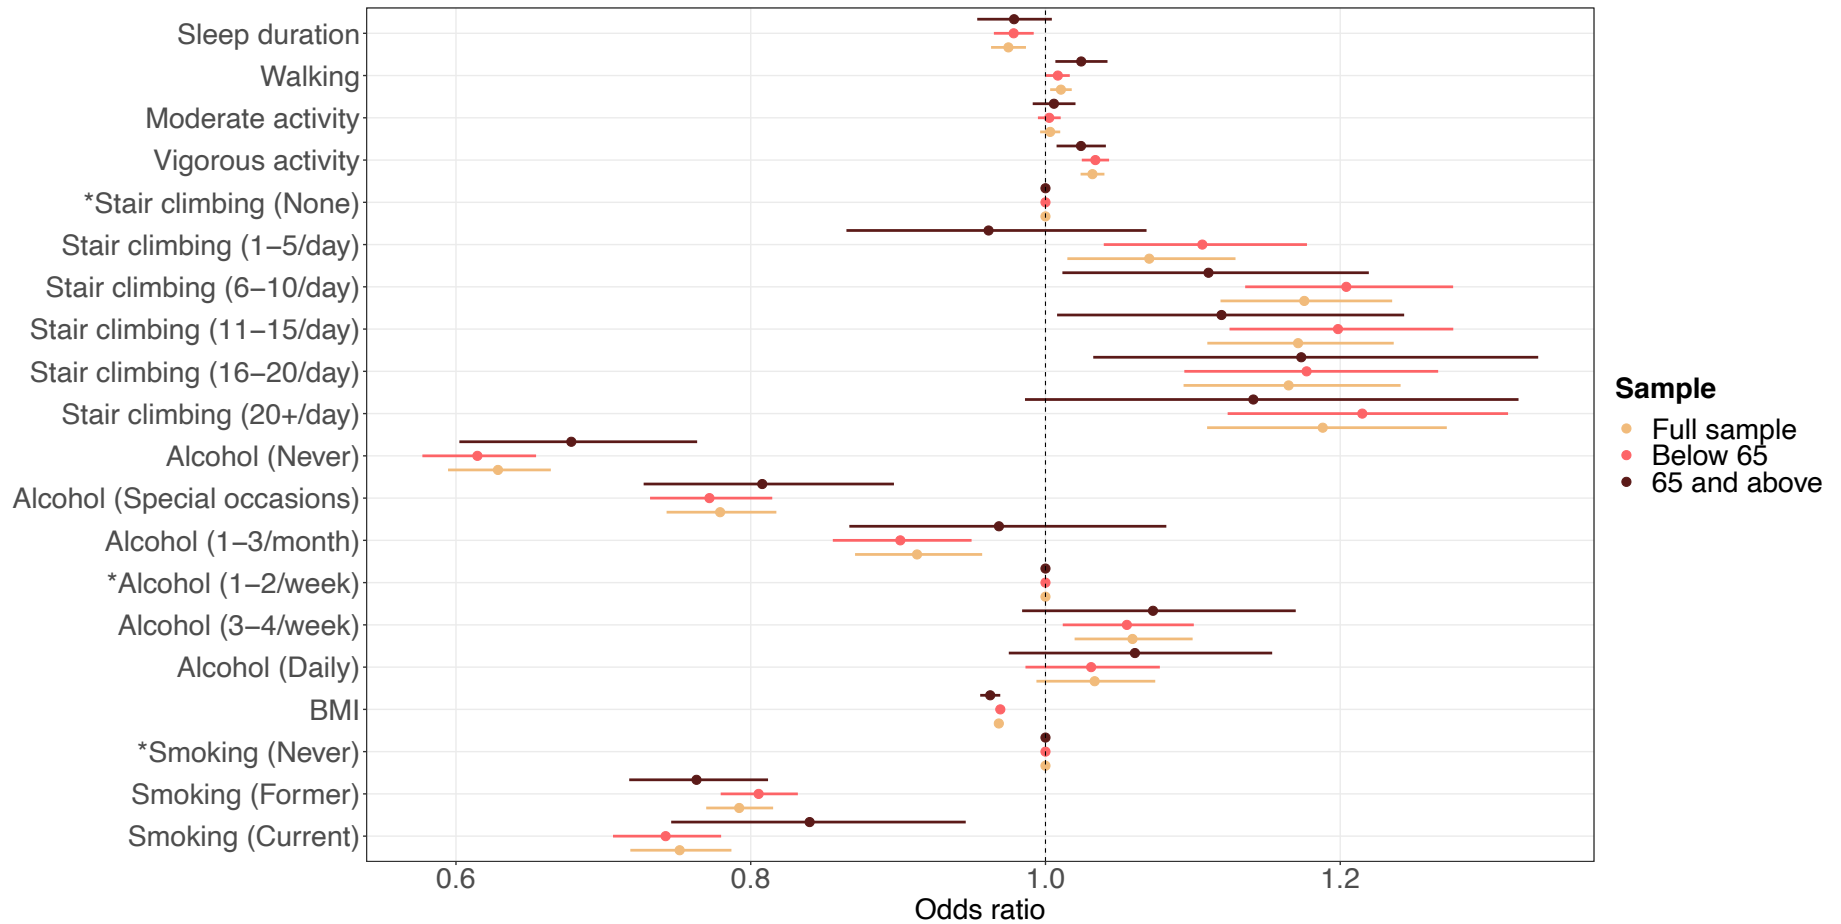

**Figure S11.** Lifestyle factors associated with health status, stratified by age. Confidence interval plot (odds ratio  $\pm$  Bonferroni-adjusted (~99.9%) confidence intervals) for Model 4 (i.e. including all explanatory variables). BMI = body mass index. \*Indicates reference group for categorical explanatory variables.

Environmental exposures

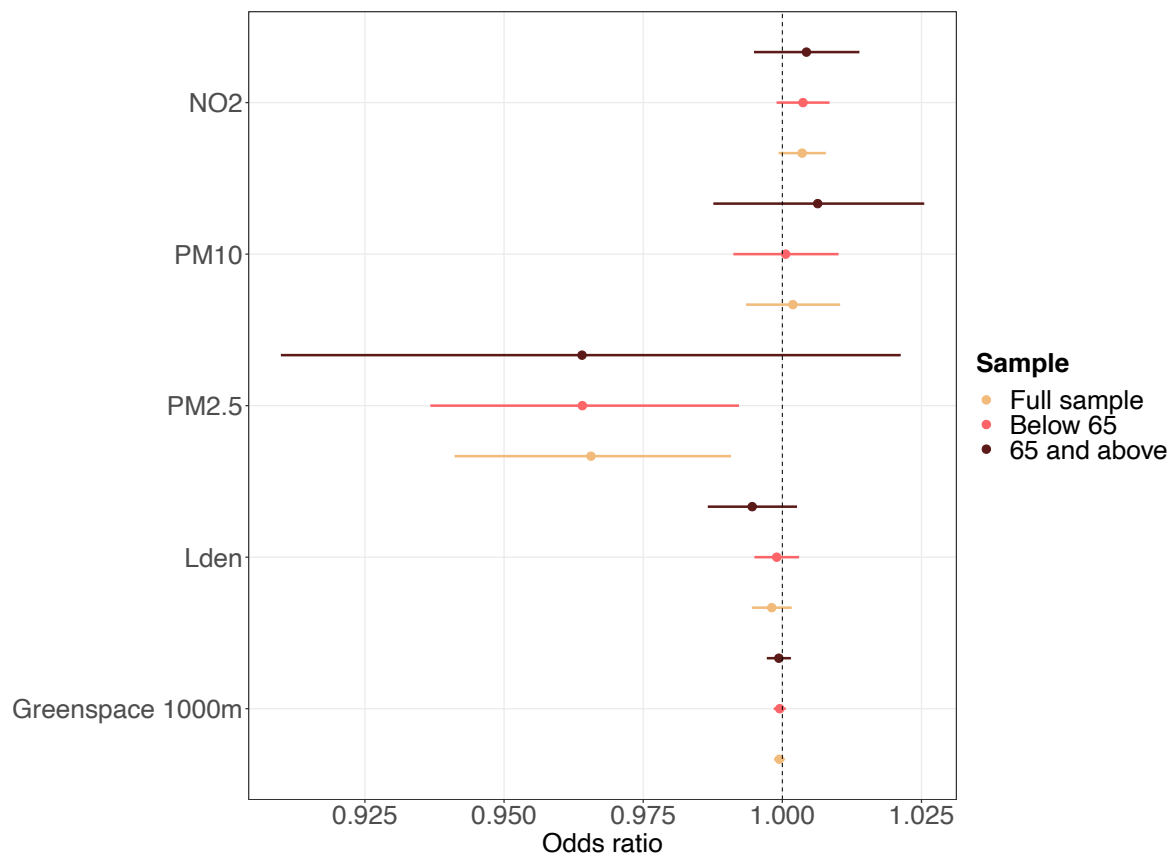

**Figure S12.** Environmental exposures associated with health status, stratified by age. Confidence interval plot (odds ratio  $\pm$  Bonferroni-adjusted (~99.9%) confidence intervals) for Model 4 (i.e. including all explanatory variables). PM = particulate matter; NO<sub>2</sub> = nitrogen dioxide; L<sub>den</sub> = day-evening-night noise level.



Tables S35-S38. Regression tables long-standing illness stratified by sex

Sociodemographic characteristics

| Table S35. Sociodemographic characteristics associated with long-standing illness stratified by sex |                  |                         |        |        |                         |        |        |                         |        |                           |                        |
|-----------------------------------------------------------------------------------------------------|------------------|-------------------------|--------|--------|-------------------------|--------|--------|-------------------------|--------|---------------------------|------------------------|
| Term                                                                                                | All participants |                         |        | Male   |                         |        | Female |                         |        | Interaction term          |                        |
|                                                                                                     | OR               | Bonferroni-corrected CI |        | OR     | Bonferroni-corrected CI |        | OR     | Bonferroni-corrected CI |        | <i>p</i> <sub>Bonf.</sub> | <i>p</i> <sub>BH</sub> |
| <b>Household income<sup>1</sup></b>                                                                 |                  |                         |        |        |                         |        |        |                         |        |                           |                        |
| Very low                                                                                            | 0.6654           | 0.6384                  | 0.6934 | 0.6067 | 0.5714                  | 0.6442 | 0.7141 | 0.6743                  | 0.7563 | <0.0001                   | <0.0001                |
| Low                                                                                                 | 0.8906           | 0.8581                  | 0.9244 | 0.8593 | 0.8154                  | 0.9056 | 0.9228 | 0.8752                  | 0.9729 | 0.0001                    | <0.0001                |
| Middle                                                                                              | Ref              | –                       | –      | Ref    | –                       | –      | Ref    | –                       | –      | –                         | –                      |
| High                                                                                                | 1.1171           | 1.0726                  | 1.1634 | 1.1170 | 1.0568                  | 1.1807 | 1.1068 | 1.0426                  | 1.1752 | >0.9999                   | 0.1703                 |
| Very high                                                                                           | 1.2524           | 1.1703                  | 1.3410 | 1.2639 | 1.1547                  | 1.3847 | 1.2112 | 1.0934                  | 1.3436 | 0.9984                    | 0.0605                 |
| <b>Sex</b>                                                                                          |                  |                         |        |        |                         |        |        |                         |        |                           |                        |
| Female                                                                                              | Ref              | –                       | –      | Ref    | –                       | –      | Ref    | –                       | –      | –                         | –                      |
| Male                                                                                                | 0.7585           | 0.7380                  | 0.7797 | –      | –                       | –      | –      | –                       | –      | –                         | –                      |
| <b>Age</b>                                                                                          | 0.9730           | 0.9711                  | 0.9748 | 0.9684 | 0.9658                  | 0.9710 | 0.9775 | 0.9748                  | 0.9801 | <0.0001                   | <0.0001                |
| <b>Multiple deprivation</b>                                                                         | 0.9921           | 0.9910                  | 0.9932 | 0.9919 | 0.9903                  | 0.9934 | 0.9924 | 0.9908                  | 0.9940 | 0.3315                    | 0.0255                 |
| <b>Ethnicity</b>                                                                                    |                  |                         |        |        |                         |        |        |                         |        |                           |                        |
| White                                                                                               | Ref              | –                       | –      | Ref    | –                       | –      | Ref    | –                       | –      | –                         | –                      |
| Mixed-race                                                                                          | 1.1223           | 0.9387                  | 1.3474 | 1.1439 | 0.8594                  | 1.5376 | 1.1235 | 0.8952                  | 1.4203 | >0.9999                   | 0.5334                 |
| Asian                                                                                               | 1.2225           | 1.0962                  | 1.3652 | 1.1664 | 1.0117                  | 1.3474 | 1.2903 | 1.0886                  | 1.5350 | >0.9999                   | 0.9754                 |
| Black                                                                                               | 1.1852           | 1.0591                  | 1.3277 | 1.4492 | 1.2161                  | 1.7330 | 1.0314 | 0.8905                  | 1.1966 | <0.0001                   | <0.0001                |
| Chinese                                                                                             | 1.6205           | 1.2207                  | 2.1842 | 1.5633 | 1.0145                  | 2.4879 | 1.7049 | 1.1788                  | 2.5373 | >0.9999                   | 0.9159                 |
| Other                                                                                               | 1.2027           | 1.0301                  | 1.4078 | 1.2967 | 1.0326                  | 1.6367 | 1.1288 | 0.9151                  | 1.3993 | >0.9999                   | 0.0605                 |
| <b>Highest qualification</b>                                                                        |                  |                         |        |        |                         |        |        |                         |        |                           |                        |
| None                                                                                                | Ref              | –                       | –      | Ref    | –                       | –      | Ref    | –                       | –      | –                         | –                      |
| O levels/GCSEs/CSEs                                                                                 | 0.9920           | 0.9485                  | 1.0375 | 0.9806 | 0.9199                  | 1.0453 | 0.9820 | 0.9212                  | 1.0466 | 0.0149                    | 0.0014                 |
| A levels/NVQ/HND/HNC <sup>2</sup>                                                                   | 0.8953           | 0.8554                  | 0.9371 | 0.9294 | 0.8723                  | 0.9902 | 0.8574 | 0.8023                  | 0.9161 | <0.0001                   | <0.0001                |
| Degree                                                                                              | 0.8550           | 0.8167                  | 0.8950 | 0.9002 | 0.8442                  | 0.9599 | 0.8028 | 0.7514                  | 0.8576 | <0.0001                   | <0.0001                |

Note: Estimates from Model 4 (i.e. including all explanatory variables). Bonferroni-adjusted (~99.9%) confidence intervals. OR = odds ratio; CI = confidence interval; GCSEs = general certificate of secondary education; CSE = certificate of secondary education; NVQ = national vocational qualification; HND = higher national diploma; HNC = higher national certificate. <sup>1</sup>Annual household income groups: very low (<£18,000), low (£18,000–£30,999), middle (£31,000–£51,999), high (£52,000–£100,000) and very high (>£100,000). <sup>2</sup>also includes 'other professional qualifications'.

Psychosocial factors

| Table S36. Psychosocial factors associated with long-standing illness stratified by sex |                  |                         |        |        |                         |        |        |                         |        |                    |                 |
|-----------------------------------------------------------------------------------------|------------------|-------------------------|--------|--------|-------------------------|--------|--------|-------------------------|--------|--------------------|-----------------|
| Term                                                                                    | All participants |                         |        | Male   |                         |        | Female |                         |        | Interaction term   |                 |
|                                                                                         | OR               | Bonferroni-corrected CI |        | OR     | Bonferroni-corrected CI |        | OR     | Bonferroni-corrected CI |        | $p_{\text{Bonf.}}$ | $p_{\text{BH}}$ |
| <b>Loneliness</b>                                                                       |                  |                         |        |        |                         |        |        |                         |        |                    |                 |
| Not lonely                                                                              | Ref              | –                       | –      | Ref    | –                       | –      | Ref    | –                       | –      | –                  | –               |
| Lonely                                                                                  | 0.7097           | 0.6722                  | 0.7494 | 0.6682 | 0.6191                  | 0.7214 | 0.7526 | 0.6964                  | 0.8136 | 0.0037             | 0.0005          |
| <b>Social isolation</b>                                                                 |                  |                         |        |        |                         |        |        |                         |        |                    |                 |
| Not isolated                                                                            | Ref              | –                       | –      | Ref    | –                       | –      | Ref    | –                       | –      | –                  | –               |
| Isolated                                                                                | 0.9185           | 0.8770                  | 0.9621 | 0.8990 | 0.8422                  | 0.9599 | 0.9325 | 0.8731                  | 0.9963 | >0.9999            | 0.0605          |

Note: Estimates from Model 4 (i.e. including all explanatory variables). Bonferroni-adjusted (~99.9%) confidence intervals. OR = odds ratio; CI = confidence interval.

## Lifestyle factors

| Table S37. Lifestyle factors associated with long-standing illness stratified by sex |                  |                         |        |        |                         |        |        |                         |        |                  |          |
|--------------------------------------------------------------------------------------|------------------|-------------------------|--------|--------|-------------------------|--------|--------|-------------------------|--------|------------------|----------|
| Term                                                                                 | All participants |                         |        | Male   |                         |        | Female |                         |        | Interaction term |          |
|                                                                                      | OR               | Bonferroni-corrected CI |        | OR     | Bonferroni-corrected CI |        | OR     | Bonferroni-corrected CI |        | $p_{Bonf.}$      | $p_{BH}$ |
| <b>Sleep duration</b> (hours/day)                                                    | 1.0004           | 0.9882                  | 1.0128 | 1.0000 | 0.9825                  | 1.0179 | 1.0087 | 0.9915                  | 1.0262 | >0.9999          | 0.0605   |
| <b>Physical activity</b> (days/week) <sup>1</sup>                                    |                  |                         |        |        |                         |        |        |                         |        |                  |          |
| Walking                                                                              | 1.0250           | 1.0175                  | 1.0325 | 1.0173 | 1.0071                  | 1.0275 | 1.0342 | 1.0233                  | 1.0453 | 0.0177           | 0.0015   |
| Moderate activity                                                                    | 0.9984           | 0.9916                  | 1.0053 | 1.0097 | 0.9997                  | 1.0199 | 0.9893 | 0.9799                  | 0.9987 | 0.3576           | 0.0255   |
| Vigorous activity                                                                    | 1.0641           | 1.0557                  | 1.0727 | 1.0618 | 1.0502                  | 1.0736 | 1.0636 | 1.0512                  | 1.0761 | >0.9999          | 0.0721   |
| <b>Stair climbing frequency</b>                                                      |                  |                         |        |        |                         |        |        |                         |        |                  |          |
| None                                                                                 | Ref              | –                       | –      | Ref    | –                       | –      | Ref    | –                       | –      | –                | –        |
| 1-5/day                                                                              | 1.1101           | 1.0522                  | 1.1710 | 1.0747 | 0.9963                  | 1.1592 | 1.1463 | 1.0625                  | 1.2366 | >0.9999          | 0.9829   |
| 6-10/day                                                                             | 1.2937           | 1.2307                  | 1.3598 | 1.2203 | 1.1365                  | 1.3100 | 1.3692 | 1.2762                  | 1.4688 | >0.9999          | 0.2991   |
| 11-15/day                                                                            | 1.3131           | 1.2434                  | 1.3866 | 1.2388 | 1.1459                  | 1.3392 | 1.3897 | 1.2873                  | 1.5001 | >0.9999          | 0.4917   |
| 16-20/day                                                                            | 1.3066           | 1.2255                  | 1.3932 | 1.2230 | 1.1158                  | 1.3406 | 1.3984 | 1.2784                  | 1.5300 | >0.9999          | 0.3744   |
| 20+/day                                                                              | 1.2975           | 1.2108                  | 1.3907 | 1.2701 | 1.1483                  | 1.4053 | 1.3355 | 1.2141                  | 1.4695 | >0.9999          | 0.3002   |
| <b>Alcohol intake frequency</b>                                                      |                  |                         |        |        |                         |        |        |                         |        |                  |          |
| Never                                                                                | 0.5533           | 0.5234                  | 0.5850 | 0.5987 | 0.5488                  | 0.6532 | 0.5192 | 0.4827                  | 0.5584 | 0.0152           | 0.0014   |
| Special occasions                                                                    | 0.7142           | 0.6809                  | 0.7492 | 0.7400 | 0.6833                  | 0.8016 | 0.6913 | 0.6506                  | 0.7347 | >0.9999          | 0.2105   |
| 1-3/month                                                                            | 0.8486           | 0.8096                  | 0.8895 | 0.8393 | 0.7811                  | 0.9020 | 0.8477 | 0.7962                  | 0.9027 | >0.9999          | 0.9159   |
| 1-2/week                                                                             | Ref              | –                       | –      | Ref    | –                       | –      | Ref    | –                       | –      | –                | –        |
| 3-4/week                                                                             | 1.0925           | 1.0514                  | 1.1353 | 1.1021 | 1.0459                  | 1.1612 | 1.0875 | 1.0274                  | 1.1512 | >0.9999          | 0.3744   |
| Daily/almost daily                                                                   | 1.0744           | 1.0326                  | 1.1180 | 1.0780 | 1.0224                  | 1.1366 | 1.0766 | 1.0129                  | 1.1444 | >0.9999          | 0.9331   |
| <b>BMI</b> (kg/m <sup>2</sup> )                                                      | 0.9419           | 0.9392                  | 0.9446 | 0.9390 | 0.9347                  | 0.9434 | 0.9437 | 0.9402                  | 0.9472 | 0.0071           | 0.0008   |
| <b>Smoking status</b>                                                                |                  |                         |        |        |                         |        |        |                         |        |                  |          |
| Never                                                                                | Ref              | –                       | –      | Ref    | –                       | –      | Ref    | –                       | –      | –                | –        |
| Former                                                                               | 0.7978           | 0.7749                  | 0.8213 | 0.7711 | 0.7401                  | 0.8034 | 0.8382 | 0.8040                  | 0.8739 | <0.0001          | <0.0001  |
| Current                                                                              | 0.7858           | 0.7506                  | 0.8227 | 0.8126 | 0.7637                  | 0.8648 | 0.7519 | 0.7024                  | 0.8051 | >0.9999          | 0.1703   |

Note: Estimates from Model 4 (i.e. including all explanatory variables). Bonferroni-adjusted (~99.9%) confidence intervals. OR = odds ratio; CI = confidence interval; BMI = body mass index. <sup>1</sup>number of days per week engaging in these activities for 10+ minutes continuously.

Environmental exposures

**Table S38. Environmental exposures associated with long-standing illness stratified by sex**

| Term                    | All participants |                         |        | Male   |                         |        | Female |                         |        | Interaction term          |                        |
|-------------------------|------------------|-------------------------|--------|--------|-------------------------|--------|--------|-------------------------|--------|---------------------------|------------------------|
|                         | OR               | Bonferroni-corrected CI |        | OR     | Bonferroni-corrected CI |        | OR     | Bonferroni-corrected CI |        | <i>p</i> <sub>Bonf.</sub> | <i>p</i> <sub>BH</sub> |
| <b>PM<sub>2.5</sub></b> | 0.9677           | 0.9430                  | 0.9932 | 0.9629 | 0.9283                  | 0.9987 | 0.9713 | 0.9362                  | 1.0079 | >0.9999                   | 0.0721                 |
| <b>PM<sub>10</sub></b>  | 1.0019           | 0.9934                  | 1.0105 | 1.0004 | 0.9884                  | 1.0125 | 1.0039 | 0.9917                  | 1.0162 | >0.9999                   | 0.3238                 |
| <b>NO<sub>2</sub></b>   | 1.0025           | 0.9982                  | 1.0068 | 1.0011 | 0.9951                  | 1.0071 | 1.0042 | 0.9981                  | 1.0104 | >0.9999                   | 0.3424                 |
| <b>L<sub>den</sub></b>  | 1.0015           | 0.9979                  | 1.0052 | 1.0037 | 0.9986                  | 1.0089 | 0.9994 | 0.9942                  | 1.0046 | >0.9999                   | 0.4917                 |
| <b>Greenspace 1000m</b> | 0.9997           | 0.9987                  | 1.0007 | 0.9992 | 0.9978                  | 1.0006 | 1.0001 | 0.9988                  | 1.0015 | >0.9999                   | 0.9754                 |

*Note:* Estimates from Model 4 (i.e. including all explanatory variables). Bonferroni-adjusted (~99.9%) confidence intervals. OR = odds ratio; CI = confidence interval; PM = particulate matter; NO<sub>2</sub> = nitrogen dioxide; L<sub>den</sub> = day-evening-night noise level.

Figures S13-S15. Confidence interval plots long-standing illness stratified by sex

Sociodemographic and psychosocial factors

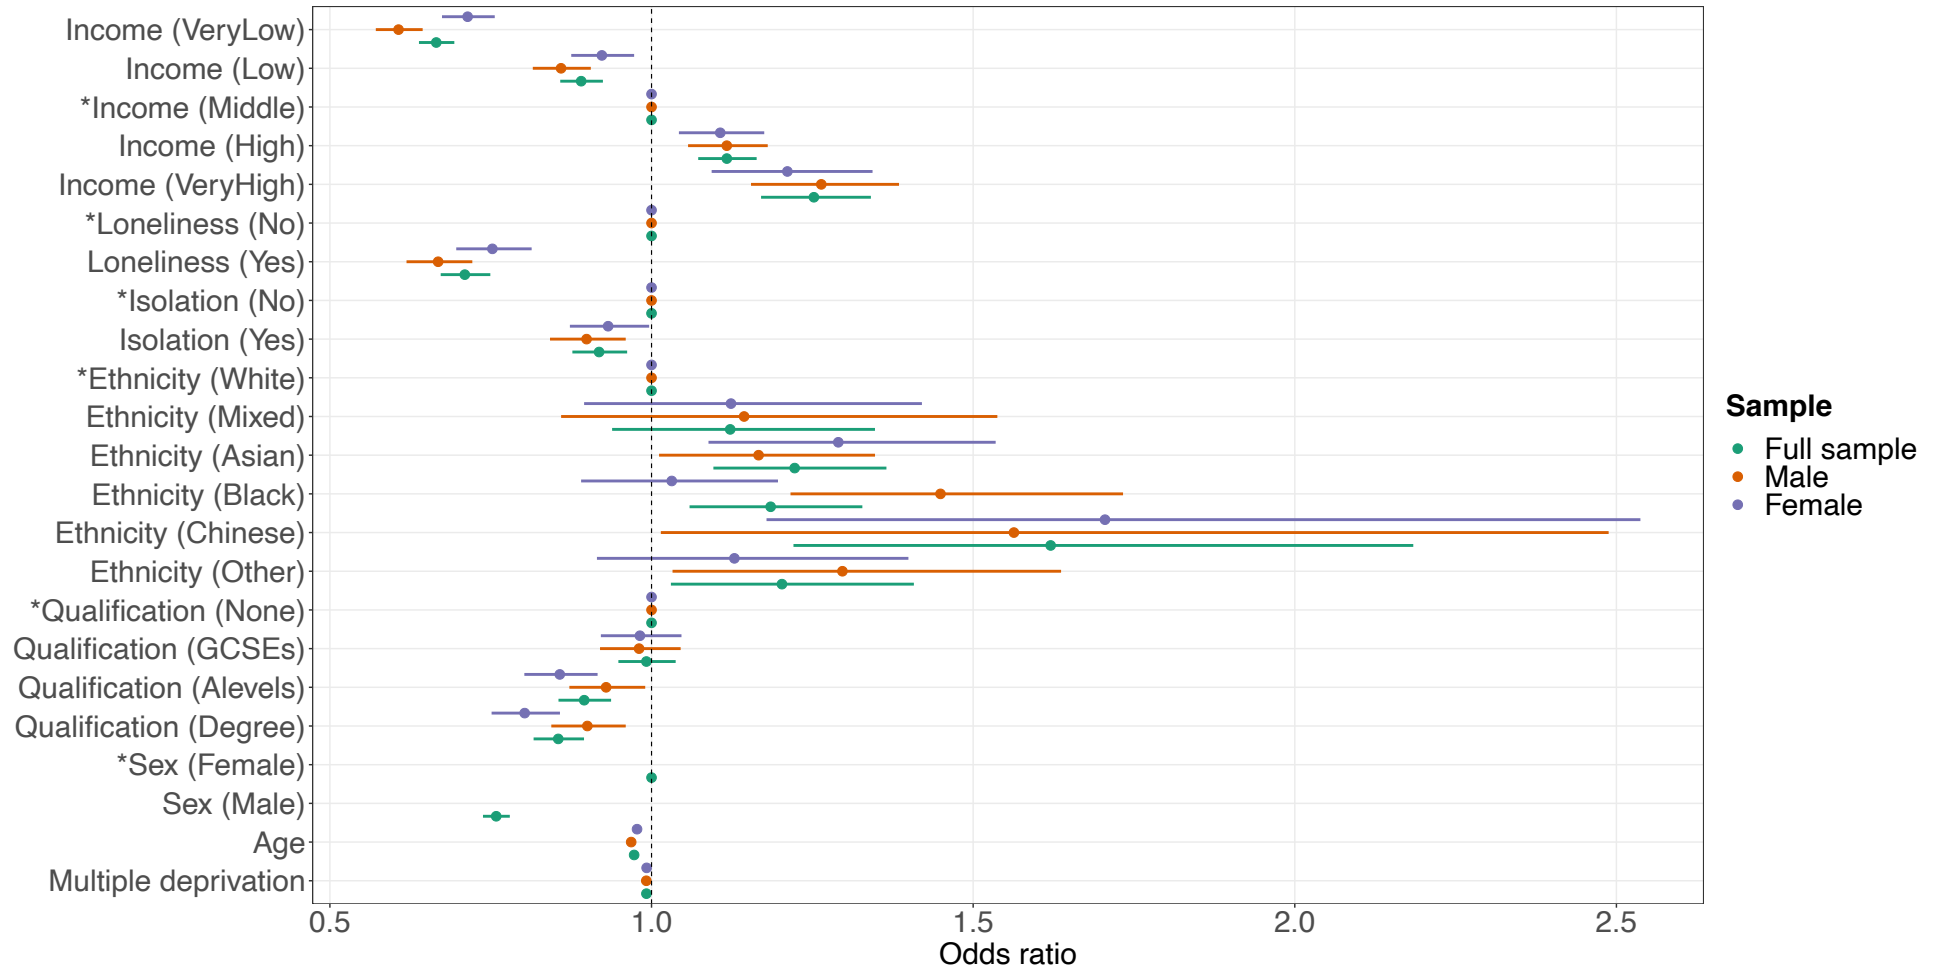

Figure S13. Sociodemographic characteristics and psychosocial factors associated with long-standing illness, stratified by sex. Confidence interval plot (odds ratio  $\pm$  Bonferroni-adjusted (~99.9%) confidence intervals) for Model 4 (i.e. including all explanatory variables). GCSEs = general certificate of secondary education. \*Indicates reference group for categorical explanatory variables. Annual household income groups: very low (<£18,000), low (£18,000–£30,999), middle (£31,000–£51,999), high (£52,000–£100,000) and very high (>£100,000). 'GCSEs' also includes O levels and certificate of secondary education (CSE). 'A levels' also includes national vocational qualification (NVQ), higher national diploma (HND), higher national certificate (HNC) and 'other professional qualifications'.

Lifestyle factors

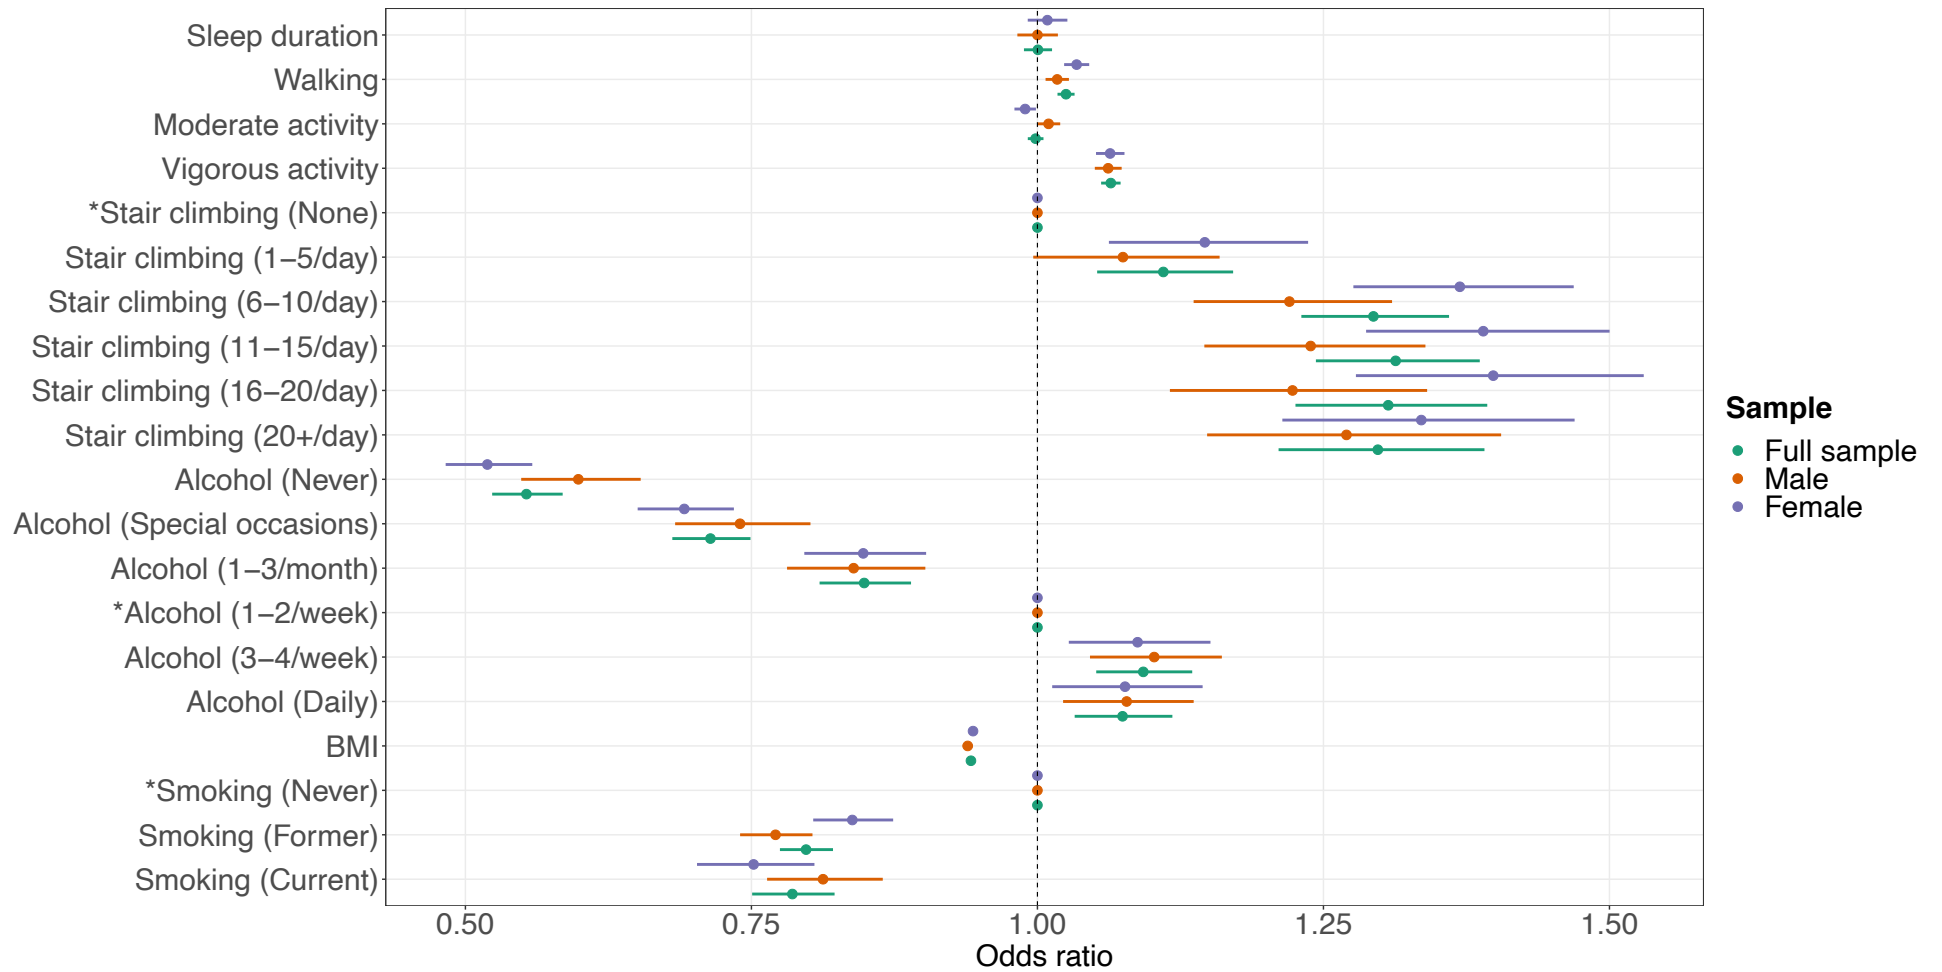

**Figure S14.** Lifestyle factors associated with long-standing illness, stratified by sex. Confidence interval plot (odds ratio  $\pm$  Bonferroni-adjusted (~99.9%) confidence intervals) for Model 4 (i.e. including all explanatory variables). BMI = body mass index. \*Indicates reference group for categorical explanatory variables.

Environmental exposures

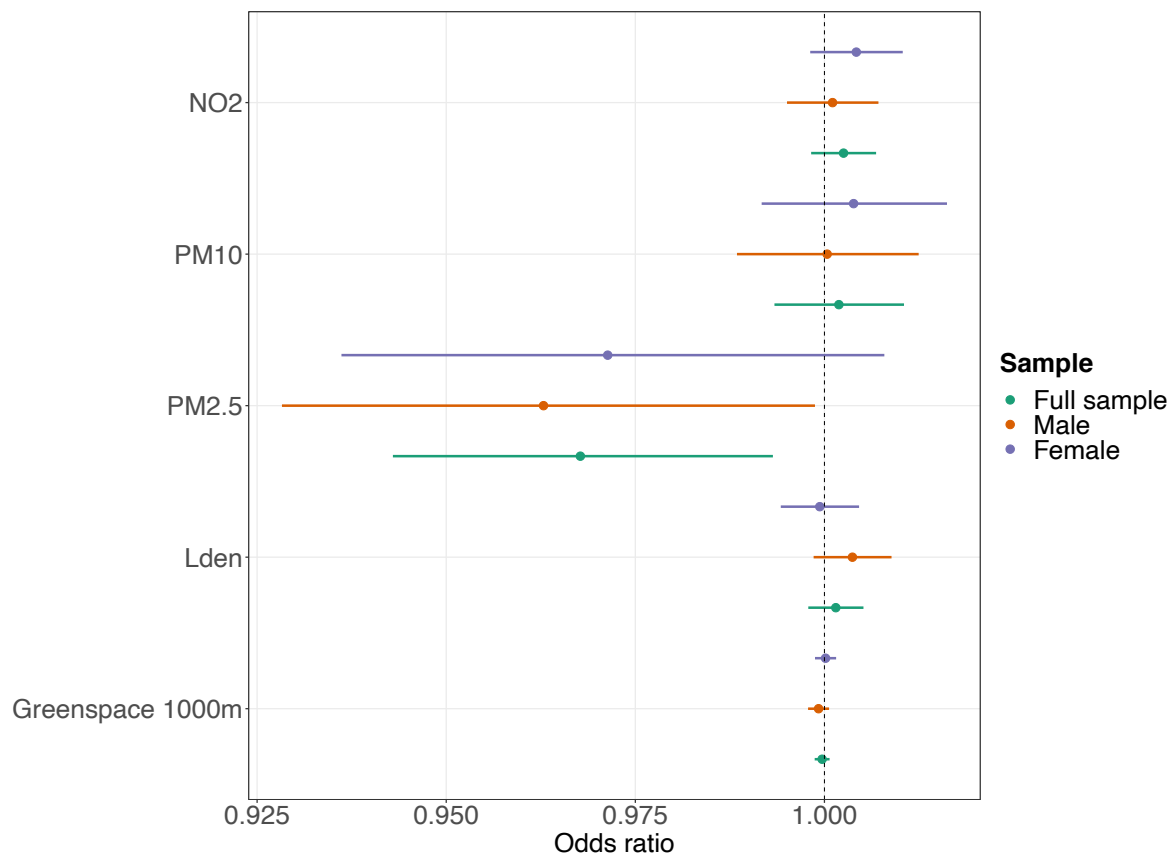

**Figure S15.** Environmental exposures associated with long-standing illness, stratified by sex. Confidence interval plot (odds ratio  $\pm$  Bonferroni-adjusted (~99.9%) confidence intervals) for Model 4 (i.e. including all explanatory variables). PM = particulate matter; NO<sub>2</sub> = nitrogen dioxide; L<sub>den</sub> = day-evening-night noise level.

Tables S39-S42. Regression tables long-standing illness stratified by age

Sociodemographic characteristics

Table S39. Sociodemographic characteristics associated with long-standing illness stratified by age

| Term                                | All participants |                         |        | Below 65 |                         |        | 65 and above |                         |        | Interaction term          |                        |
|-------------------------------------|------------------|-------------------------|--------|----------|-------------------------|--------|--------------|-------------------------|--------|---------------------------|------------------------|
|                                     | OR               | Bonferroni-corrected CI |        | OR       | Bonferroni-corrected CI |        | OR           | Bonferroni-corrected CI |        | <i>p</i> <sub>Bonf.</sub> | <i>p</i> <sub>BH</sub> |
| <b>Household income<sup>1</sup></b> |                  |                         |        |          |                         |        |              |                         |        |                           |                        |
| Very low                            | 0.6654           | 0.6384                  | 0.6934 | 0.6115   | 0.5837                  | 0.6405 | 0.8485       | 0.7712                  | 0.9334 | <0.0001                   | <0.0001                |
| Low                                 | 0.8906           | 0.8581                  | 0.9244 | 0.8888   | 0.8527                  | 0.9263 | 0.9497       | 0.8691                  | 1.0375 | 0.1447                    | 0.0072                 |
| Middle                              | Ref              | –                       | –      | Ref      | –                       | –      | Ref          | –                       | –      | –                         | –                      |
| High                                | 1.1171           | 1.0726                  | 1.1634 | 1.1103   | 1.0637                  | 1.1590 | 1.0561       | 0.9228                  | 1.2096 | >0.9999                   | 0.0776                 |
| Very high                           | 1.2524           | 1.1703                  | 1.3410 | 1.2450   | 1.1599                  | 1.3372 | 1.1402       | 0.8881                  | 1.4724 | >0.9999                   | 0.0720                 |
| <b>Sex</b>                          |                  |                         |        |          |                         |        |              |                         |        |                           |                        |
| Female                              | Ref              | –                       | –      | Ref      | –                       | –      | Ref          | –                       | –      | –                         | –                      |
| Male                                | 0.7585           | 0.7380                  | 0.7797 | 0.7670   | 0.7439                  | 0.7909 | 0.7216       | 0.6770                  | 0.7690 | <0.0001                   | <0.0001                |
| <b>Age</b>                          |                  |                         |        |          |                         |        |              |                         |        |                           |                        |
|                                     | 0.9730           | 0.9711                  | 0.9748 | 0.9708   | 0.9685                  | 0.9730 | 0.9752       | 0.9558                  | 0.9950 | –                         | –                      |
| <b>Multiple deprivation</b>         |                  |                         |        |          |                         |        |              |                         |        |                           |                        |
|                                     | 0.9921           | 0.9910                  | 0.9932 | 0.9922   | 0.9910                  | 0.9935 | 0.9919       | 0.9893                  | 0.9945 | >0.9999                   | 0.6879                 |
| <b>Ethnicity</b>                    |                  |                         |        |          |                         |        |              |                         |        |                           |                        |
| White                               | Ref              | –                       | –      | Ref      | –                       | –      | Ref          | –                       | –      | –                         | –                      |
| Mixed-race                          | 1.1223           | 0.9387                  | 1.3474 | 1.0957   | 0.9097                  | 1.3257 | 1.4796       | 0.7911                  | 2.9027 | >0.9999                   | 0.9750                 |
| Asian                               | 1.2225           | 1.0962                  | 1.3652 | 1.2957   | 1.1502                  | 1.4621 | 0.9176       | 0.6924                  | 1.2196 | <0.0001                   | <0.0001                |
| Black                               | 1.1852           | 1.0591                  | 1.3277 | 1.2185   | 1.0824                  | 1.3735 | 0.9258       | 0.6330                  | 1.3562 | 0.0015                    | 0.0001                 |
| Chinese                             | 1.6205           | 1.2207                  | 2.1842 | 1.6305   | 1.2120                  | 2.2309 | 1.7656       | 0.6992                  | 5.1866 | >0.9999                   | 0.3689                 |
| Other                               | 1.2027           | 1.0301                  | 1.4078 | 1.2814   | 1.0861                  | 1.5165 | 0.7729       | 0.4805                  | 1.2433 | <0.0001                   | <0.0001                |
| <b>Highest qualification</b>        |                  |                         |        |          |                         |        |              |                         |        |                           |                        |
| None                                | Ref              | –                       | –      | Ref      | –                       | –      | Ref          | –                       | –      | –                         | –                      |
| O levels/GCSEs/CSEs                 | 0.9920           | 0.9485                  | 1.0375 | 1.0113   | 0.9588                  | 1.0665 | 1.0088       | 0.9242                  | 1.1011 | <0.0001                   | <0.0001                |
| A levels/NVQ/HND/HNC <sup>2</sup>   | 0.8953           | 0.8554                  | 0.9371 | 0.9185   | 0.8699                  | 0.9697 | 0.8943       | 0.8193                  | 0.9760 | <0.0001                   | <0.0001                |
| Degree                              | 0.8550           | 0.8167                  | 0.8950 | 0.8775   | 0.8312                  | 0.9261 | 0.8600       | 0.7843                  | 0.9430 | <0.0001                   | <0.0001                |

Note: Estimates from Model 4 (i.e. including all explanatory variables). Bonferroni-adjusted (~99.9%) confidence intervals. OR = odds ratio; CI = confidence interval; GCSEs = general certificate of secondary education; CSE = certificate of secondary education; NVQ = national vocational qualification; HND = higher national diploma; HNC = higher national certificate. <sup>1</sup>Annual household income groups: very low (<£18,000), low (£18,000–£30,999), middle (£31,000–£51,999), high (£52,000–£100,000) and very high (>£100,000). <sup>2</sup>also includes 'other professional qualifications'.



Psychosocial factors

Table S40. Psychosocial factors associated with long-standing illness stratified by age

| Term                    | All participants |                         |        | Below 65 |                         |        | 65 and above |                         |        | Interaction term   |                 |
|-------------------------|------------------|-------------------------|--------|----------|-------------------------|--------|--------------|-------------------------|--------|--------------------|-----------------|
|                         | OR               | Bonferroni-corrected CI |        | OR       | Bonferroni-corrected CI |        | OR           | Bonferroni-corrected CI |        | $p_{\text{Bonf.}}$ | $p_{\text{BH}}$ |
| <b>Loneliness</b>       |                  |                         |        |          |                         |        |              |                         |        |                    |                 |
| Not lonely              | Ref              | –                       | –      | Ref      | –                       | –      | Ref          | –                       | –      | –                  | –               |
| Lonely                  | 0.7097           | 0.6722                  | 0.7494 | 0.7077   | 0.6670                  | 0.7511 | 0.7328       | 0.6401                  | 0.8392 | >0.9999            | 0.0776          |
| <b>Social isolation</b> |                  |                         |        |          |                         |        |              |                         |        |                    |                 |
| Not isolated            | Ref              | –                       | –      | Ref      | –                       | –      | Ref          | –                       | –      | –                  | –               |
| Isolated                | 0.9185           | 0.8770                  | 0.9621 | 0.9168   | 0.8711                  | 0.9650 | 0.9448       | 0.8468                  | 1.0546 | 0.0001             | <0.0001         |

Note: Estimates from Model 4 (i.e. including all explanatory variables). Bonferroni-adjusted (~99.9%) confidence intervals. OR = odds ratio; CI = confidence interval.

Lifestyle factors

| Table S41. Lifestyle factors associated with long-standing illness stratified by age |                  |                         |        |          |                         |        |              |                         |        |                           |                        |
|--------------------------------------------------------------------------------------|------------------|-------------------------|--------|----------|-------------------------|--------|--------------|-------------------------|--------|---------------------------|------------------------|
| Term                                                                                 | All participants |                         |        | Below 65 |                         |        | 65 and above |                         |        | Interaction term          |                        |
|                                                                                      | OR               | Bonferroni-corrected CI |        | OR       | Bonferroni-corrected CI |        | OR           | Bonferroni-corrected CI |        | <i>p</i> <sub>Bonf.</sub> | <i>p</i> <sub>BH</sub> |
| <b>Sleep duration</b> (hours/day)                                                    | 1.0004           | 0.9882                  | 1.0128 | 1.0010   | 0.9872                  | 1.0150 | 1.0031       | 0.9766                  | 1.0302 | 0.0758                    | 0.0042                 |
| <b>Physical activity</b> (days/week) <sup>1</sup>                                    |                  |                         |        |          |                         |        |              |                         |        |                           |                        |
| Walking                                                                              | 1.0250           | 1.0175                  | 1.0325 | 1.0215   | 1.0134                  | 1.0297 | 1.0441       | 1.0257                  | 1.0628 | <0.0001                   | <0.0001                |
| Moderate activity                                                                    | 0.9984           | 0.9916                  | 1.0053 | 0.9958   | 0.9881                  | 1.0036 | 1.0081       | 0.9931                  | 1.0232 | <0.0001                   | <0.0001                |
| Vigorous activity                                                                    | 1.0641           | 1.0557                  | 1.0727 | 1.0665   | 1.0569                  | 1.0762 | 1.0551       | 1.0372                  | 1.0733 | >0.9999                   | 0.9750                 |
| <b>Stair climbing frequency</b>                                                      |                  |                         |        |          |                         |        |              |                         |        |                           |                        |
| None                                                                                 | Ref              | –                       | –      | Ref      | –                       | –      | Ref          | –                       | –      | –                         | –                      |
| 1-5/day                                                                              | 1.1101           | 1.0522                  | 1.1710 | 1.1256   | 1.0576                  | 1.1979 | 1.0512       | 0.9437                  | 1.1708 | <0.0001                   | <0.0001                |
| 6-10/day                                                                             | 1.2937           | 1.2307                  | 1.3598 | 1.2962   | 1.2222                  | 1.3745 | 1.2988       | 1.1801                  | 1.4292 | 0.0002                    | <0.0001                |
| 11-15/day                                                                            | 1.3131           | 1.2434                  | 1.3866 | 1.3104   | 1.2296                  | 1.3964 | 1.3528       | 1.2139                  | 1.5075 | 0.0441                    | 0.0026                 |
| 16-20/day                                                                            | 1.3066           | 1.2255                  | 1.3932 | 1.2799   | 1.1890                  | 1.3778 | 1.4677       | 1.2837                  | 1.6790 | >0.9999                   | 0.0631                 |
| 20+/day                                                                              | 1.2975           | 1.2108                  | 1.3907 | 1.2935   | 1.1957                  | 1.3996 | 1.3680       | 1.1744                  | 1.5952 | >0.9999                   | 0.1379                 |
| <b>Alcohol intake frequency</b>                                                      |                  |                         |        |          |                         |        |              |                         |        |                           |                        |
| Never                                                                                | 0.5533           | 0.5234                  | 0.5850 | 0.5390   | 0.5062                  | 0.5739 | 0.6084       | 0.5390                  | 0.6867 | 0.2955                    | 0.0141                 |
| Special occasions                                                                    | 0.7142           | 0.6809                  | 0.7492 | 0.7070   | 0.6702                  | 0.7458 | 0.7452       | 0.6691                  | 0.8299 | 0.0211                    | 0.0013                 |
| 1-3/month                                                                            | 0.8486           | 0.8096                  | 0.8895 | 0.8408   | 0.7984                  | 0.8855 | 0.8828       | 0.7877                  | 0.9896 | 0.1011                    | 0.0053                 |
| 1-2/week                                                                             | Ref              | –                       | –      | Ref      | –                       | –      | Ref          | –                       | –      | –                         | –                      |
| 3-4/week                                                                             | 1.0925           | 1.0514                  | 1.1353 | 1.0794   | 1.0345                  | 1.1262 | 1.1667       | 1.0659                  | 1.2770 | >0.9999                   | 0.9558                 |
| Daily/almost daily                                                                   | 1.0744           | 1.0326                  | 1.1180 | 1.0720   | 1.0252                  | 1.1211 | 1.1248       | 1.0303                  | 1.2279 | >0.9999                   | 0.4071                 |
| <b>BMI</b> (kg/m <sup>2</sup> )                                                      | 0.9419           | 0.9392                  | 0.9446 | 0.9425   | 0.9396                  | 0.9455 | 0.9392       | 0.9324                  | 0.9461 | <0.0001                   | <0.0001                |
| <b>Smoking status</b>                                                                |                  |                         |        |          |                         |        |              |                         |        |                           |                        |
| Never                                                                                | Ref              | –                       | –      | Ref      | –                       | –      | Ref          | –                       | –      | –                         | –                      |
| Former                                                                               | 0.7978           | 0.7749                  | 0.8213 | 0.8114   | 0.7853                  | 0.8385 | 0.7592       | 0.7120                  | 0.8094 | <0.0001                   | <0.0001                |
| Current                                                                              | 0.7858           | 0.7506                  | 0.8227 | 0.7824   | 0.7447                  | 0.8222 | 0.8565       | 0.7578                  | 0.9687 | >0.9999                   | 0.2871                 |

Note: Estimates from Model 4 (i.e. including all explanatory variables). Bonferroni-adjusted (~99.9%) confidence intervals. OR = odds ratio; CI = confidence interval; BMI = body mass index. <sup>1</sup>number of days per week engaging in these activities for 10+ minutes continuously.

Environmental exposures

Table S42. Environmental exposures associated with long-standing illness stratified by age

| Term                    | All participants |                         | Below 65 |                         | 65 and above |                         | Interaction term |          |        |         |        |
|-------------------------|------------------|-------------------------|----------|-------------------------|--------------|-------------------------|------------------|----------|--------|---------|--------|
|                         | OR               | Bonferroni-corrected CI | OR       | Bonferroni-corrected CI | OR           | Bonferroni-corrected CI | $p_{Bonf.}$      | $p_{BH}$ |        |         |        |
| <b>PM<sub>2.5</sub></b> | 0.9677           | 0.9430                  | 0.9932   | 0.9704                  | 0.9428       | 0.9988                  | 0.9517           | 0.8966   | 1.0102 | >0.9999 | 0.2850 |
| <b>PM<sub>10</sub></b>  | 1.0019           | 0.9934                  | 1.0105   | 1.0016                  | 0.9921       | 1.0112                  | 1.0028           | 0.9834   | 1.0226 | >0.9999 | 0.9425 |
| <b>NO<sub>2</sub></b>   | 1.0025           | 0.9982                  | 1.0068   | 1.0025                  | 0.9977       | 1.0073                  | 1.0036           | 0.9938   | 1.0134 | >0.9999 | 0.3335 |
| <b>L<sub>den</sub></b>  | 1.0015           | 0.9979                  | 1.0052   | 1.0020                  | 0.9980       | 1.0061                  | 0.9995           | 0.9911   | 1.0079 | >0.9999 | 0.0776 |
| <b>Greenspace 1000m</b> | 0.9997           | 0.9987                  | 1.0007   | 0.9998                  | 0.9987       | 1.0009                  | 0.9995           | 0.9972   | 1.0018 | >0.9999 | 0.6879 |

Note: Estimates from Model 4 (i.e. including all explanatory variables). Bonferroni-adjusted (~99.9%) confidence intervals. OR = odds ratio; CI = confidence interval; PM = particulate matter; NO<sub>2</sub> = nitrogen dioxide; L<sub>den</sub> = day-evening-night noise level.

Figures S16-S18. Confidence interval plots long-standing illness stratified by age

Sociodemographic and psychosocial factors

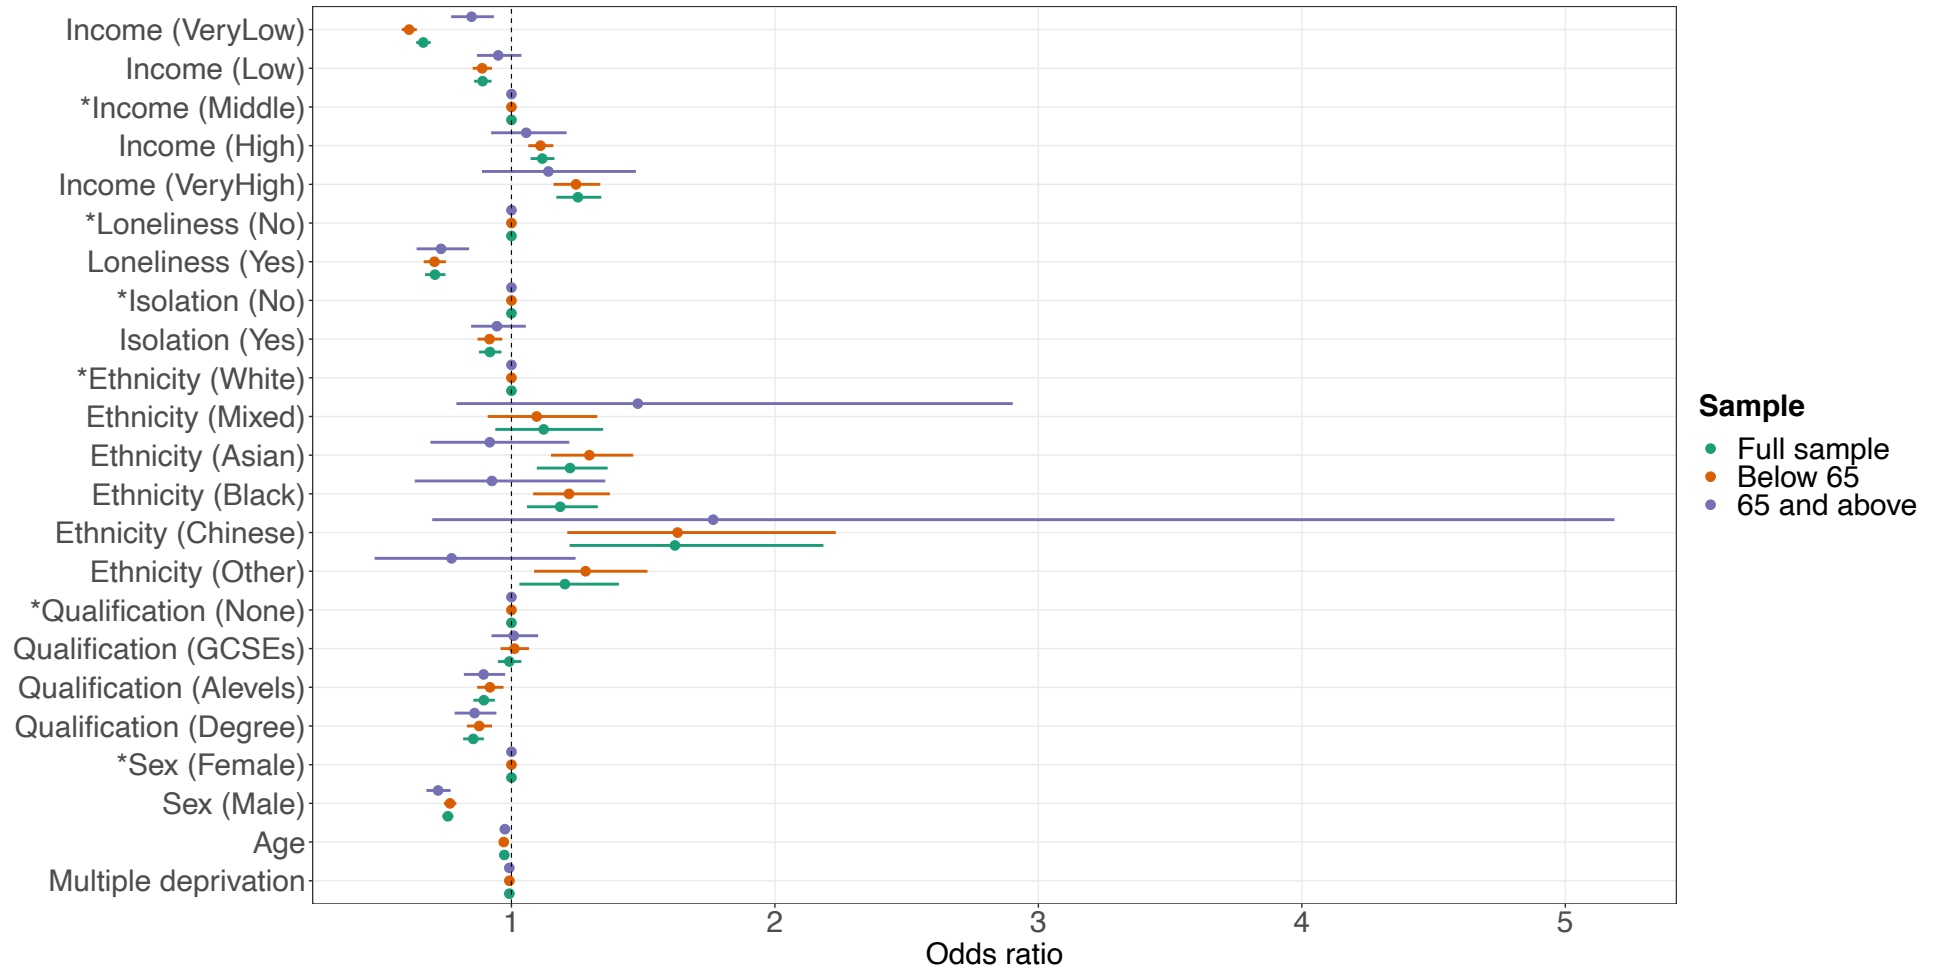

**Figure S16.** Sociodemographic characteristics and psychosocial factors associated with long-standing illness, stratified by age. Confidence interval plot (odds ratio  $\pm$  Bonferroni-adjusted (~99.9%) confidence intervals) for Model 4 (i.e. including all explanatory variables). GCSEs = general certificate of secondary education. \*Indicates reference group for categorical explanatory variables. Annual household income groups: very low (<£18,000), low (£18,000–£30,999), middle (£31,000–£51,999), high (£52,000–£100,000) and very high (>£100,000). 'GCSEs' also includes O levels and certificate of secondary education (CSE). 'A levels' also includes national vocational qualification (NVQ), higher national diploma (HND), higher national certificate (HNC) and 'other professional qualifications'.

Lifestyle factors

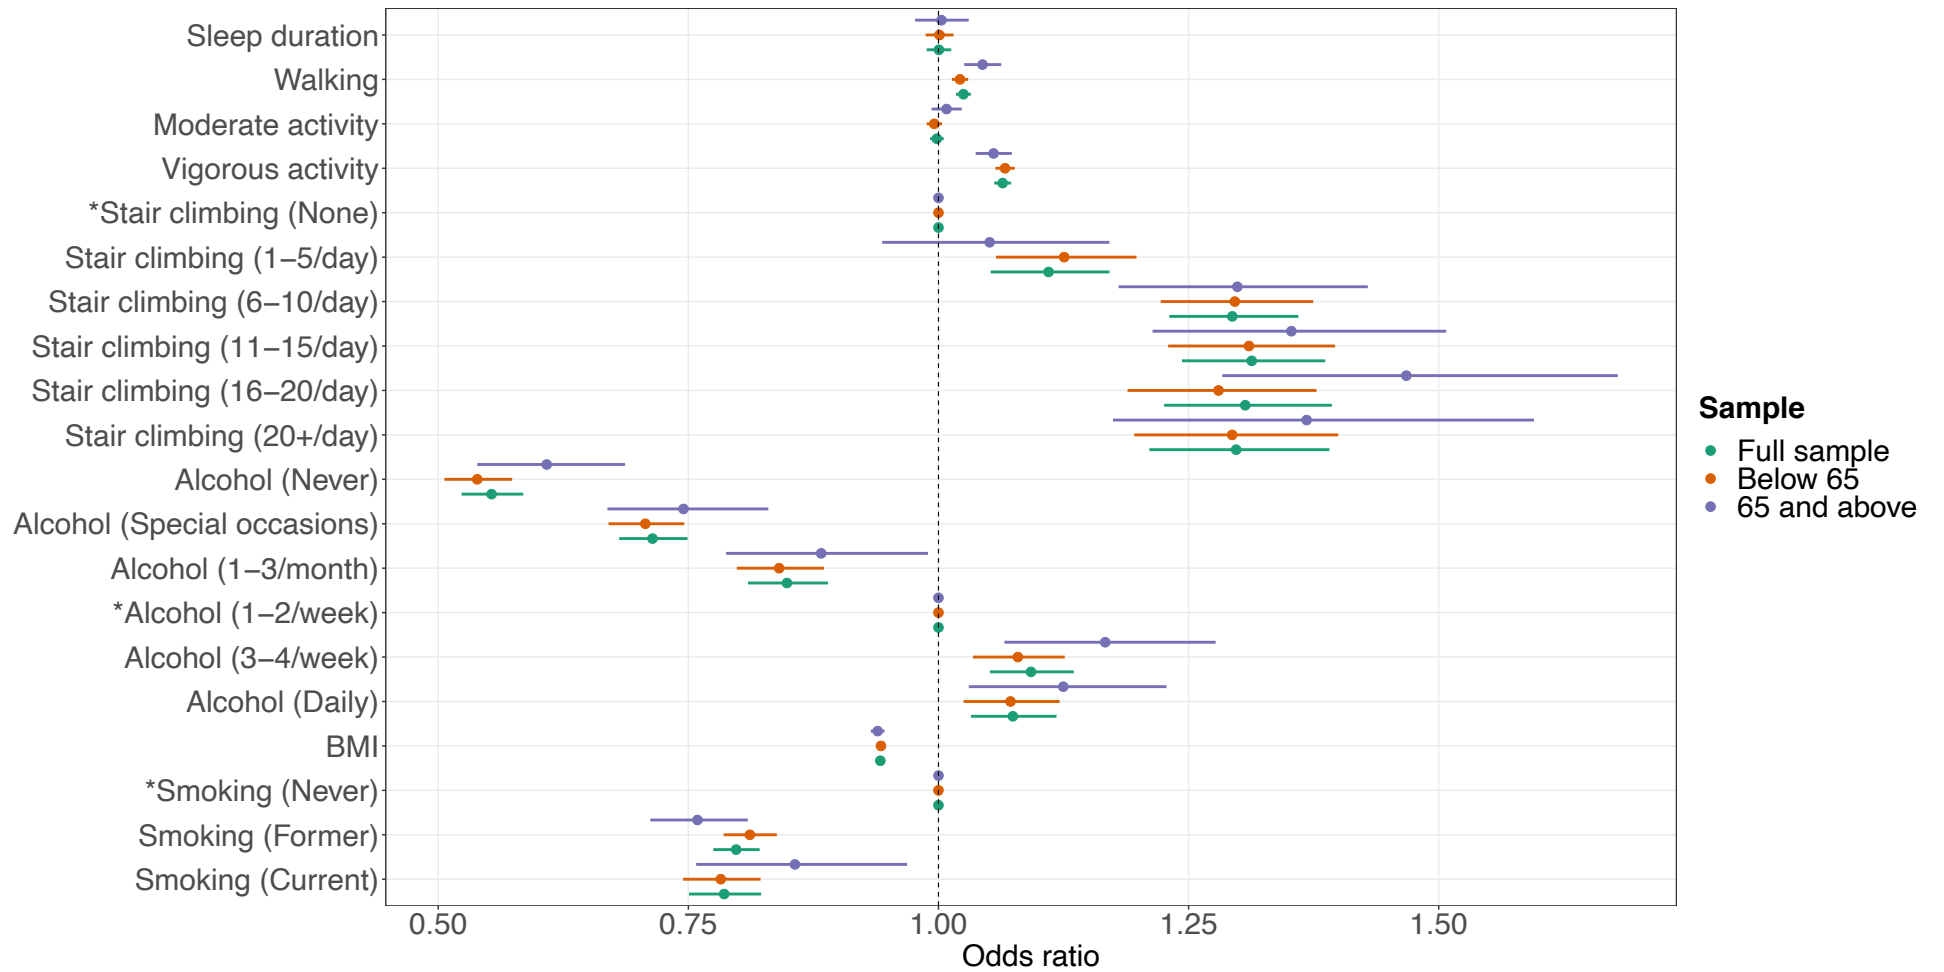

**Figure S17.** Lifestyle factors associated with long-standing illness, stratified by age. Confidence interval plot (odds ratio  $\pm$  Bonferroni-adjusted (~99.9%) confidence intervals) for Model 4 (i.e. including all explanatory variables). BMI = body mass index. \*Indicates reference group for categorical explanatory variables.

Environmental exposures

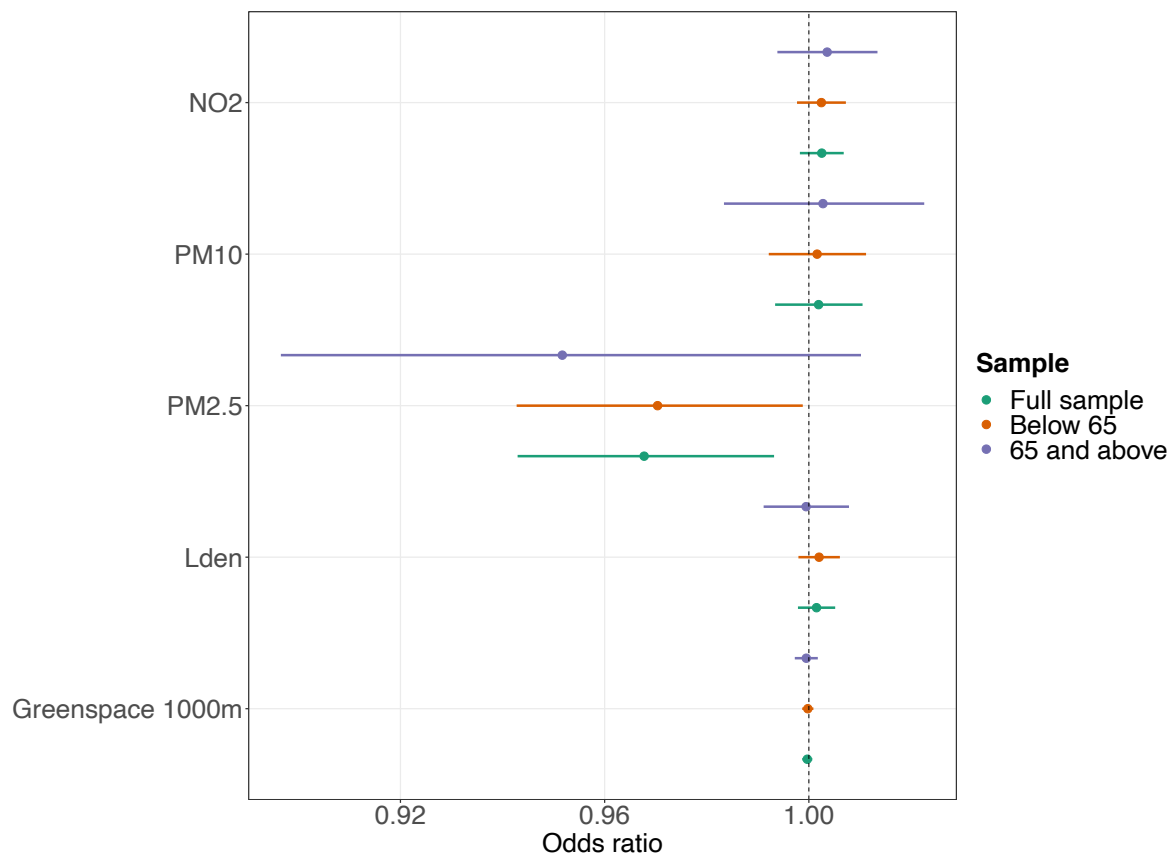

**Figure S18.** Environmental exposures associated with long-standing illness, stratified by age. Confidence interval plot (odds ratio  $\pm$  Bonferroni-adjusted (~99.9%) confidence intervals) for Model 4 (i.e. including all explanatory variables). PM = particulate matter; NO<sub>2</sub> = nitrogen dioxide; L<sub>den</sub> = day-evening-night noise level.

Tables S43-S46. Regression tables self-rated health stratified by sex

Sociodemographic characteristics

| Table S43. Sociodemographic characteristics associated with self-rated health stratified by sex |                  |                         |        |        |                         |        |        |                         |        |                           |                        |
|-------------------------------------------------------------------------------------------------|------------------|-------------------------|--------|--------|-------------------------|--------|--------|-------------------------|--------|---------------------------|------------------------|
| Term                                                                                            | All participants |                         |        | Male   |                         |        | Female |                         |        | Interaction term          |                        |
|                                                                                                 | OR               | Bonferroni-corrected CI |        | OR     | Bonferroni-corrected CI |        | OR     | Bonferroni-corrected CI |        | <i>p</i> <sub>Bonf.</sub> | <i>p</i> <sub>BH</sub> |
| <b>Household income<sup>1</sup></b>                                                             |                  |                         |        |        |                         |        |        |                         |        |                           |                        |
| Very low                                                                                        | 0.6192           | 0.5960                  | 0.6432 | 0.5733 | 0.5418                  | 0.6065 | 0.6505 | 0.6175                  | 0.6852 | <0.0001                   | <0.0001                |
| Low                                                                                             | 0.8512           | 0.8234                  | 0.8799 | 0.8300 | 0.7912                  | 0.8706 | 0.8650 | 0.8259                  | 0.9059 | 0.1481                    | 0.0067                 |
| Middle                                                                                          | Ref              | –                       | –      | Ref    | –                       | –      | Ref    | –                       | –      | –                         | –                      |
| High                                                                                            | 1.2102           | 1.1691                  | 1.2526 | 1.2497 | 1.1910                  | 1.3113 | 1.1722 | 1.1156                  | 1.2318 | 0.0002                    | <0.0001                |
| Very high                                                                                       | 1.6364           | 1.5491                  | 1.7286 | 1.7228 | 1.5975                  | 1.8580 | 1.5552 | 1.4361                  | 1.6842 | <0.0001                   | <0.0001                |
| <b>Sex</b>                                                                                      |                  |                         |        |        |                         |        |        |                         |        |                           |                        |
| Female                                                                                          | Ref              | –                       | –      | Ref    | –                       | –      | Ref    | –                       | –      | –                         | –                      |
| Male                                                                                            | 0.7836           | 0.7648                  | 0.8030 | –      | –                       | –      | –      | –                       | –      | –                         | –                      |
| <b>Age</b>                                                                                      | 1.0113           | 1.0097                  | 1.0130 | 1.0118 | 1.0094                  | 1.0142 | 1.0108 | 1.0084                  | 1.0132 | <0.0001                   | <0.0001                |
| <b>Multiple deprivation</b>                                                                     | 0.9923           | 0.9913                  | 0.9933 | 0.9915 | 0.9901                  | 0.9930 | 0.9932 | 0.9917                  | 0.9946 | <0.0001                   | <0.0001                |
| <b>Ethnicity</b>                                                                                |                  |                         |        |        |                         |        |        |                         |        |                           |                        |
| White                                                                                           | Ref              | –                       | –      | Ref    | –                       | –      | Ref    | –                       | –      | –                         | –                      |
| Mixed-race                                                                                      | 0.9019           | 0.7729                  | 1.0527 | 1.0413 | 0.8098                  | 1.3399 | 0.8229 | 0.6762                  | 1.0020 | 0.5618                    | 0.0208                 |
| Asian                                                                                           | 0.5995           | 0.5445                  | 0.6602 | 0.6139 | 0.5407                  | 0.6970 | 0.5739 | 0.4948                  | 0.6658 | 0.8350                    | 0.0288                 |
| Black                                                                                           | 1.0896           | 0.9839                  | 1.2069 | 1.4325 | 1.2258                  | 1.6745 | 0.8748 | 0.7643                  | 1.0017 | <0.0001                   | <0.0001                |
| Chinese                                                                                         | 0.6783           | 0.5413                  | 0.8506 | 0.7109 | 0.4948                  | 1.0236 | 0.6773 | 0.5069                  | 0.9063 | >0.9999                   | 0.2264                 |
| Other                                                                                           | 0.8903           | 0.7746                  | 1.0235 | 1.1508 | 0.9361                  | 1.4154 | 0.7210 | 0.5972                  | 0.8710 | <0.0001                   | <0.0001                |
| <b>Highest qualification</b>                                                                    |                  |                         |        |        |                         |        |        |                         |        |                           |                        |
| None                                                                                            | Ref              | –                       | –      | Ref    | –                       | –      | Ref    | –                       | –      | –                         | –                      |
| O levels/GCSEs/CSEs                                                                             | 1.2420           | 1.1920                  | 1.2941 | 1.2168 | 1.1471                  | 1.2908 | 1.2412 | 1.1716                  | 1.3149 | 0.7710                    | 0.0275                 |
| A levels/NVQ/HND/HNC <sup>2</sup>                                                               | 1.2876           | 1.2345                  | 1.3429 | 1.2761 | 1.2030                  | 1.3536 | 1.2892 | 1.2138                  | 1.3692 | 0.0201                    | 0.0010                 |
| Degree                                                                                          | 1.5031           | 1.4412                  | 1.5676 | 1.5429 | 1.4537                  | 1.6376 | 1.4286 | 1.3456                  | 1.5166 | <0.0001                   | <0.0001                |

Note: Estimates from Model 4 (i.e. including all explanatory variables). Bonferroni-adjusted (~99.9%) confidence intervals. OR = odds ratio; CI = confidence interval; GCSEs = general certificate of secondary education; CSE = certificate of secondary education; NVQ = national vocational qualification; HND = higher national diploma; HNC = higher national certificate. For categorical explanatory variables the odds ratios indicate the changes in odds of reporting better self-rated health associated with the explanatory variable group relative to the reference group. Odds ratios for continuous explanatory variables indicate proportional odds ratios for a 1-unit increase in the explanatory variable on level of self-rated health. <sup>1</sup>Annual household income groups: very low (<£18,000), low (£18,000–£30,999), middle (£31,000–£51,999), high (£52,000–£100,000) and very high (>£100,000). <sup>2</sup>also includes 'other professional qualifications'.

Psychosocial factors

**Table S44. Psychosocial factors associated with self-rated health stratified by sex**

| Term                    | All participants |                         |        | Male   |                         |        | Female |                         |        | Interaction term |          |
|-------------------------|------------------|-------------------------|--------|--------|-------------------------|--------|--------|-------------------------|--------|------------------|----------|
|                         | OR               | Bonferroni-corrected CI |        | OR     | Bonferroni-corrected CI |        | OR     | Bonferroni-corrected CI |        | $p_{Bonf.}$      | $p_{BH}$ |
| <b>Loneliness</b>       |                  |                         |        |        |                         |        |        |                         |        |                  |          |
| Not lonely              | Ref              | –                       | –      | Ref    | –                       | –      | Ref    | –                       | –      | –                | –        |
| Lonely                  | 0.4921           | 0.4678                  | 0.5176 | 0.4901 | 0.4564                  | 0.5263 | 0.4971 | 0.4626                  | 0.5342 | 0.0172           | 0.0009   |
| <b>Social isolation</b> |                  |                         |        |        |                         |        |        |                         |        |                  |          |
| Not isolated            | Ref              | –                       | –      | Ref    | –                       | –      | Ref    | –                       | –      | –                | –        |
| Isolated                | 0.8593           | 0.8233                  | 0.8970 | 0.8311 | 0.7821                  | 0.8831 | 0.8805 | 0.8286                  | 0.9358 | <0.0001          | <0.0001  |

*Note:* Estimates from Model 4 (i.e. including all explanatory variables). Bonferroni-adjusted (~99.9%) confidence intervals. OR = odds ratio; CI = confidence interval. For categorical explanatory variables the odds ratios indicate the changes in odds of reporting better self-rated health associated with the explanatory variable group relative to the reference group.



## Lifestyle factors

| Table S45. Lifestyle factors associated with self-rated health stratified by sex |                  |                         |        |        |                         |        |        |                         |        |                    |                 |
|----------------------------------------------------------------------------------|------------------|-------------------------|--------|--------|-------------------------|--------|--------|-------------------------|--------|--------------------|-----------------|
| Term                                                                             | All participants |                         |        | Male   |                         |        | Female |                         |        | Interaction term   |                 |
|                                                                                  | OR               | Bonferroni-corrected CI |        | OR     | Bonferroni-corrected CI |        | OR     | Bonferroni-corrected CI |        | $p_{\text{Bonf.}}$ | $p_{\text{BH}}$ |
| <b>Sleep duration</b> (hours/day)                                                | 1.0730           | 1.0609                  | 1.0852 | 1.0685 | 1.0510                  | 1.0864 | 1.0812 | 1.0644                  | 1.0983 | >0.9999            | 0.1448          |
| <b>Physical activity</b> (days/week) <sup>1</sup>                                |                  |                         |        |        |                         |        |        |                         |        |                    |                 |
| Walking                                                                          | 1.0522           | 1.0454                  | 1.0591 | 1.0477 | 1.0382                  | 1.0573 | 1.0577 | 1.0477                  | 1.0677 | 0.1603             | 0.0070          |
| Moderate activity                                                                | 1.0132           | 1.0070                  | 1.0195 | 1.0256 | 1.0164                  | 1.0350 | 1.0050 | 0.9966                  | 1.0134 | <0.0001            | <0.0001         |
| Vigorous activity                                                                | 1.1668           | 1.1585                  | 1.1751 | 1.1766 | 1.1648                  | 1.1886 | 1.1506 | 1.1390                  | 1.1624 | <0.0001            | <0.0001         |
| <b>Stair climbing frequency</b>                                                  |                  |                         |        |        |                         |        |        |                         |        |                    |                 |
| None                                                                             | Ref              | –                       | –      | Ref    | –                       | –      | Ref    | –                       | –      | –                  | –               |
| 1-5/day                                                                          | 1.0533           | 1.0019                  | 1.1074 | 1.0459 | 0.9744                  | 1.1226 | 1.0578 | 0.9854                  | 1.1355 | >0.9999            | 0.5955          |
| 6-10/day                                                                         | 1.2293           | 1.1733                  | 1.2878 | 1.2207 | 1.1422                  | 1.3045 | 1.2290 | 1.1511                  | 1.3121 | 0.4963             | 0.0191          |
| 11-15/day                                                                        | 1.2892           | 1.2260                  | 1.3557 | 1.3136 | 1.2220                  | 1.4119 | 1.2642 | 1.1785                  | 1.3562 | 0.0001             | <0.0001         |
| 16-20/day                                                                        | 1.2991           | 1.2258                  | 1.3767 | 1.2994 | 1.1944                  | 1.4135 | 1.3008 | 1.2004                  | 1.4097 | 0.0168             | 0.0009          |
| 20+/day                                                                          | 1.3652           | 1.2828                  | 1.4529 | 1.4561 | 1.3287                  | 1.5956 | 1.3054 | 1.1986                  | 1.4217 | <0.0001            | <0.0001         |
| <b>Alcohol intake frequency</b>                                                  |                  |                         |        |        |                         |        |        |                         |        |                    |                 |
| Never                                                                            | 0.6624           | 0.6285                  | 0.6981 | 0.7264 | 0.6688                  | 0.7890 | 0.6123 | 0.5717                  | 0.6558 | 0.0033             | 0.0002          |
| Special occasions                                                                | 0.7565           | 0.7240                  | 0.7904 | 0.7772 | 0.7214                  | 0.8373 | 0.7253 | 0.6861                  | 0.7666 | >0.9999            | 0.6945          |
| 1-3/month                                                                        | 0.9201           | 0.8821                  | 0.9597 | 0.9173 | 0.8591                  | 0.9795 | 0.9101 | 0.8610                  | 0.9621 | >0.9999            | 0.4250          |
| 1-2/week                                                                         | Ref              | –                       | –      | Ref    | –                       | –      | Ref    | –                       | –      | –                  | –               |
| 3-4/week                                                                         | 1.0520           | 1.0178                  | 1.0875 | 1.0396 | 0.9926                  | 1.0888 | 1.0700 | 1.0203                  | 1.1222 | >0.9999            | 0.5955          |
| Daily/almost daily                                                               | 1.0264           | 0.9913                  | 1.0628 | 0.9998 | 0.9535                  | 1.0484 | 1.0609 | 1.0074                  | 1.1172 | >0.9999            | 0.3959          |
| <b>BMI</b> (kg/m <sup>2</sup> )                                                  | 0.9045           | 0.9020                  | 0.9069 | 0.8908 | 0.8870                  | 0.8946 | 0.9119 | 0.9087                  | 0.9150 | <0.0001            | <0.0001         |
| <b>Smoking status</b>                                                            |                  |                         |        |        |                         |        |        |                         |        |                    |                 |
| Never                                                                            | Ref              | –                       | –      | Ref    | –                       | –      | Ref    | –                       | –      | –                  | –               |
| Former                                                                           | 0.8128           | 0.7919                  | 0.8342 | 0.7768 | 0.7484                  | 0.8063 | 0.8619 | 0.8309                  | 0.8941 | <0.0001            | <0.0001         |
| Current                                                                          | 0.5029           | 0.4825                  | 0.5242 | 0.5007 | 0.4733                  | 0.5297 | 0.5005 | 0.4706                  | 0.5322 | 0.0015             | 0.0001          |

Note: Estimates from Model 4 (i.e. including all explanatory variables). Bonferroni-adjusted (~99.9%) confidence intervals. OR = odds ratio; CI = confidence interval; BMI = body mass index. For categorical explanatory variables the odds ratios indicate the changes in odds of reporting better self-rated health associated with the explanatory variable group relative to the reference group. Odds ratios for continuous explanatory variables indicate proportional odds ratios for a 1-unit increase in the explanatory variable on level of self-rated health. <sup>1</sup>number of days per week engaging in these activities for 10+ minutes continuously.

Environmental exposures

**Table S46. Environmental exposures associated with self-rated health stratified by sex**

| Term                    | All participants |                         |        | Male   |                         | Female |                         |        | Interaction term   |                 |        |
|-------------------------|------------------|-------------------------|--------|--------|-------------------------|--------|-------------------------|--------|--------------------|-----------------|--------|
|                         | OR               | Bonferroni-corrected CI |        | OR     | Bonferroni-corrected CI | OR     | Bonferroni-corrected CI |        | $p_{\text{Bonf.}}$ | $p_{\text{BH}}$ |        |
| <b>PM<sub>2.5</sub></b> | 1.0283           | 1.0047                  | 1.0525 | 1.0267 | 0.9933                  | 1.0612 | 1.0289                  | 0.9959 | 1.0630             | 0.0031          | 0.0002 |
| <b>PM<sub>10</sub></b>  | 0.9979           | 0.9904                  | 1.0055 | 0.9959 | 0.9852                  | 1.0067 | 1.0003                  | 0.9898 | 1.0110             | 0.2851          | 0.0119 |
| <b>NO<sub>2</sub></b>   | 0.9948           | 0.9910                  | 0.9986 | 0.9955 | 0.9901                  | 1.0009 | 0.9945                  | 0.9892 | 0.9998             | 0.3695          | 0.0148 |
| <b>L<sub>den</sub></b>  | 1.0025           | 0.9993                  | 1.0058 | 1.0016 | 0.9970                  | 1.0063 | 1.0035                  | 0.9989 | 1.0080             | >0.9999         | 0.1412 |
| <b>Greenspace 1000m</b> | 1.0007           | 0.9998                  | 1.0015 | 1.0010 | 0.9998                  | 1.0023 | 1.0004                  | 0.9992 | 1.0016             | >0.9999         | 0.0889 |

*Note:* Estimates from Model 4 (i.e. including all explanatory variables). Bonferroni-adjusted (~99.9%) confidence intervals. OR = odds ratio; CI = confidence interval; PM = particulate matter; NO<sub>2</sub> = nitrogen dioxide; L<sub>den</sub> = day-evening-night noise level. Odds ratios indicate proportional odds ratios for a 1-unit increase in the explanatory variable on level of self-rated health.

Figures S19-S21. Confidence interval plots self-rated health stratified by sex

Sociodemographic and psychosocial factors

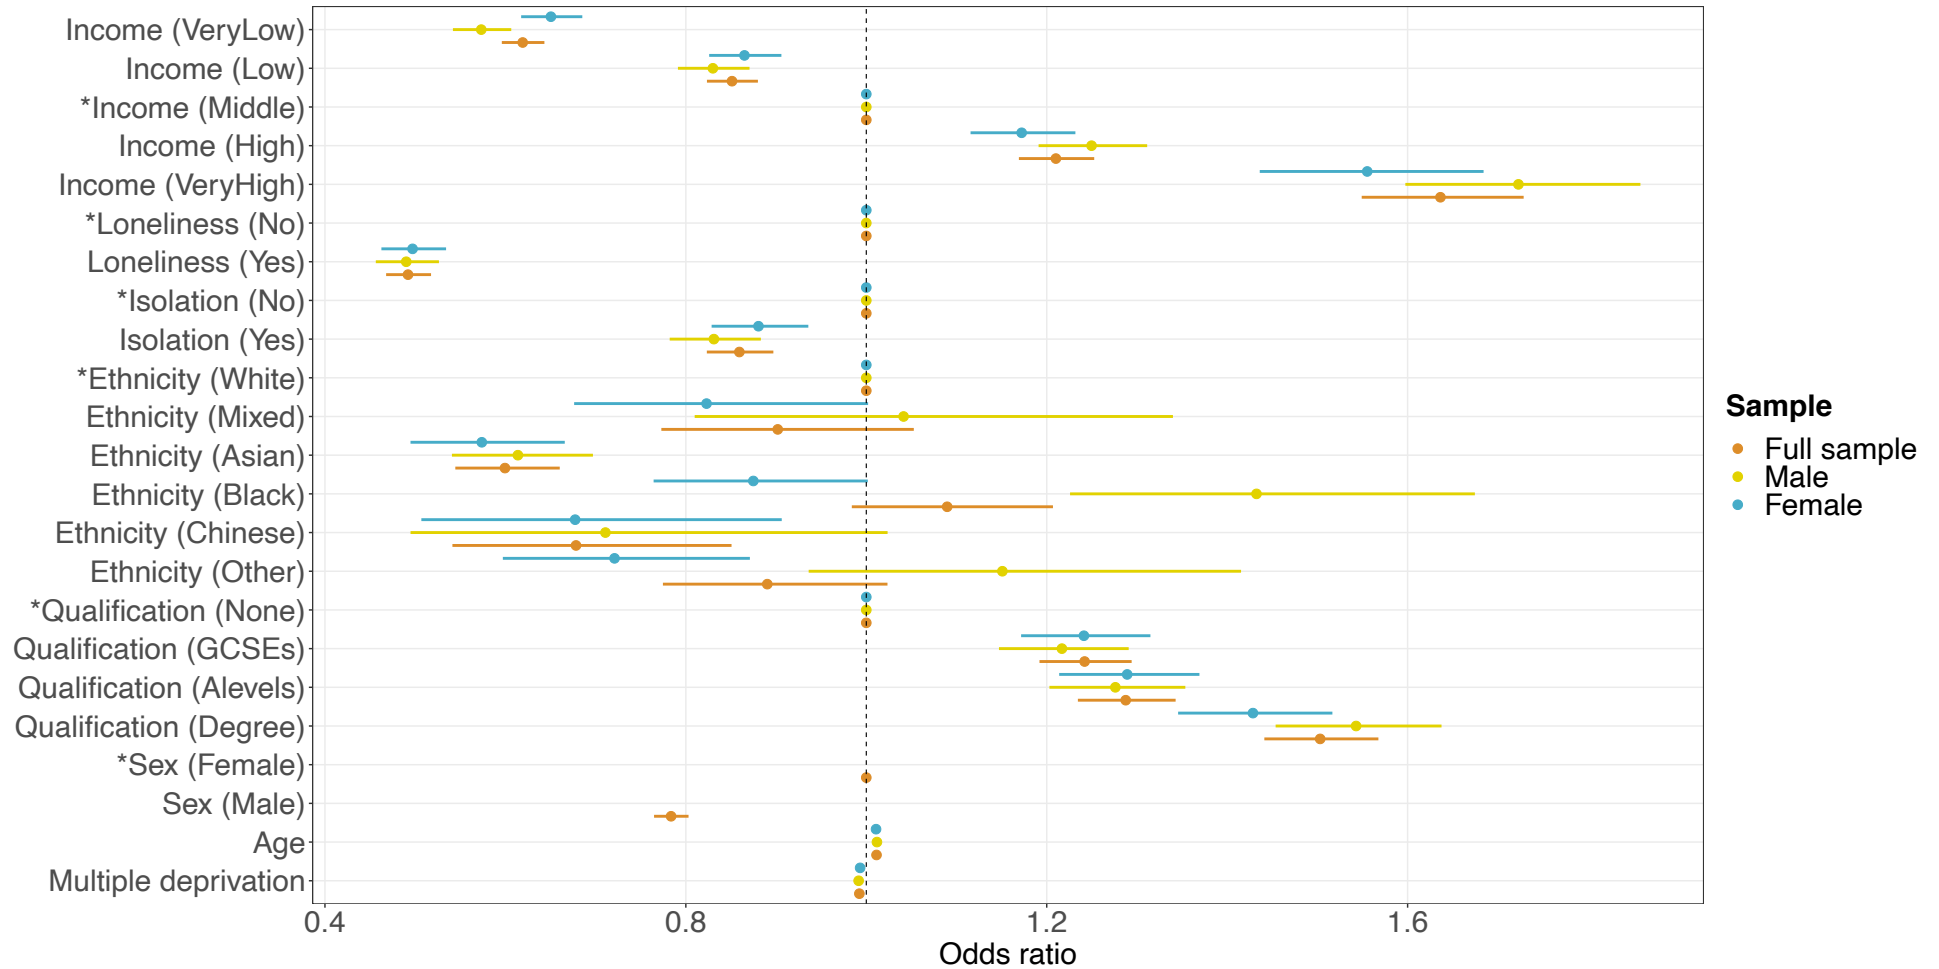

**Figure S19.** Sociodemographic characteristics and psychosocial factors associated with self-rated health, stratified by sex. Confidence interval plot (odds ratio  $\pm$  Bonferroni-adjusted (~99.9%) confidence intervals) for Model 4 (i.e. including all explanatory variables). GCSEs = general certificate of secondary education. \*Indicates reference group for categorical explanatory variables. Annual household income groups: very low (<£18,000), low (£18,000–£30,999), middle (£31,000–£51,999), high (£52,000–£100,000) and very high (>£100,000). 'GCSEs' also includes O levels and certificate of secondary education (CSE). 'A levels' also includes national vocational qualification (NVQ), higher national diploma (HND), higher national certificate (HNC) and 'other professional qualifications'.

Lifestyle factors

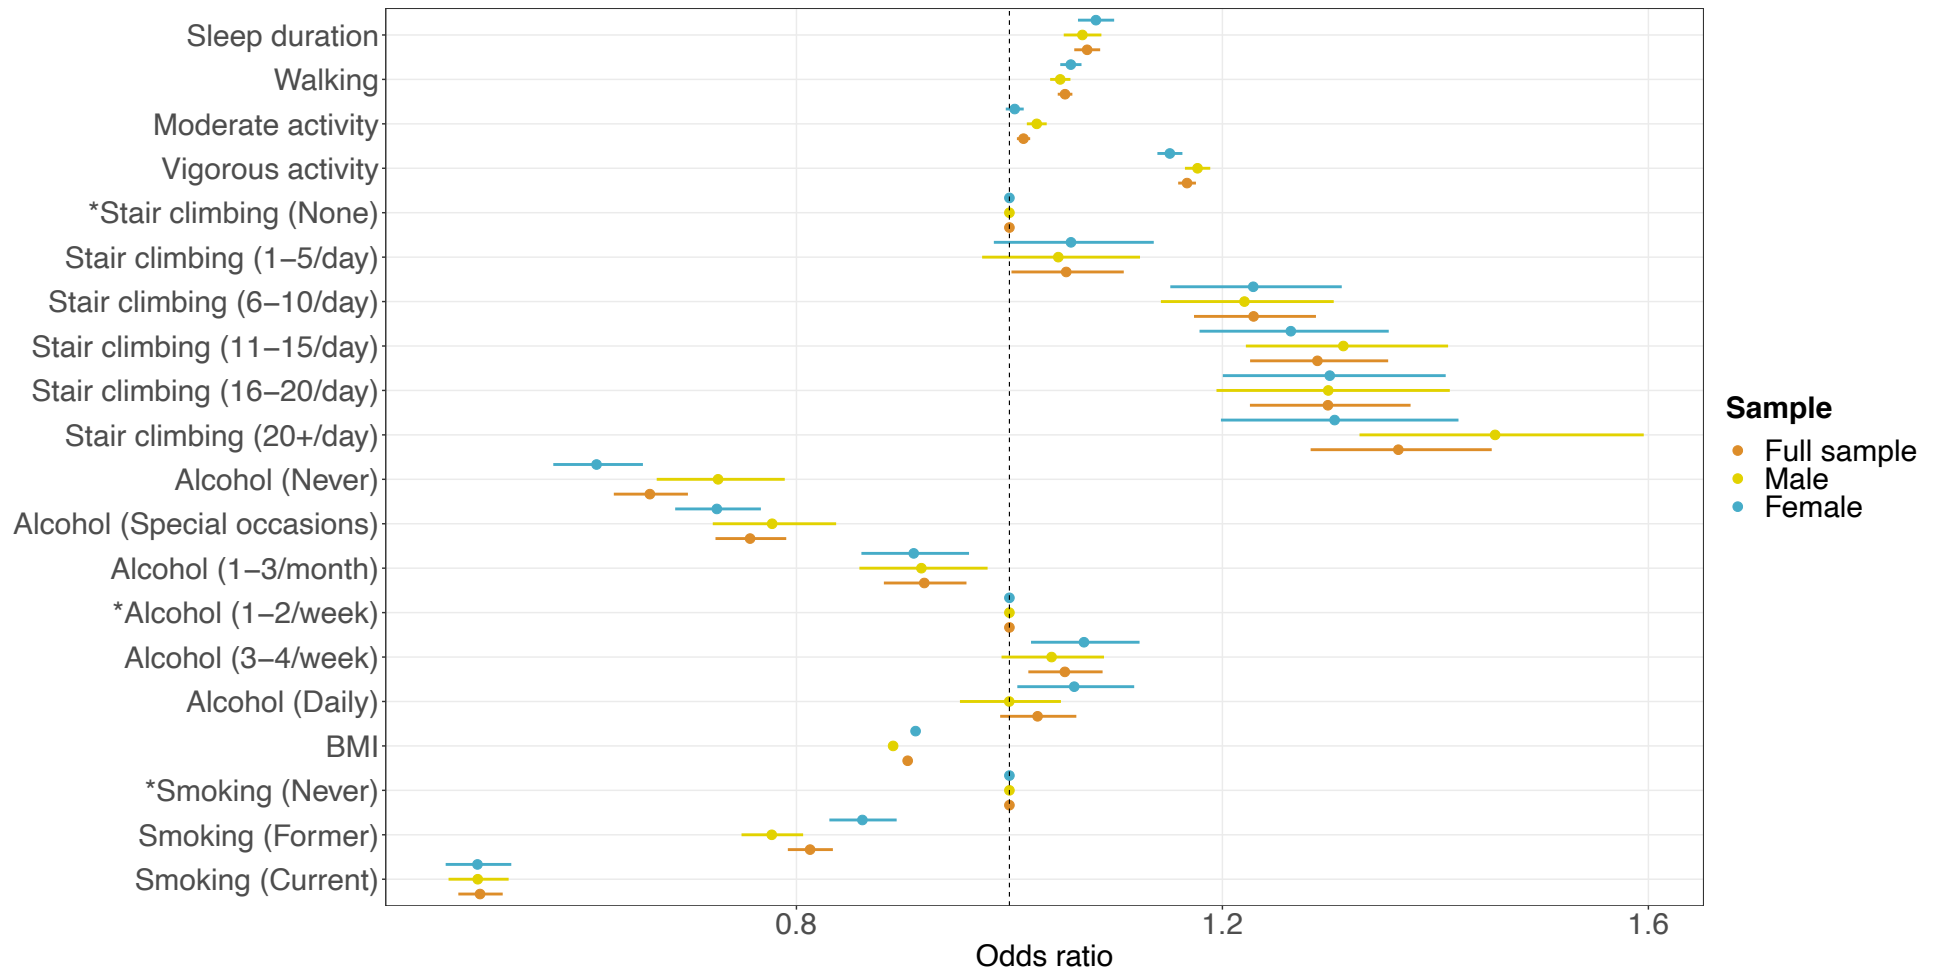

**Figure S20.** Lifestyle factors associated with self-rated health, stratified by sex. Confidence interval plot (odds ratio  $\pm$  Bonferroni-adjusted (~99.9%) confidence intervals) for Model 4 (i.e. including all explanatory variables). BMI = body mass index. \*Indicates reference group for categorical explanatory variables.

Environmental exposures

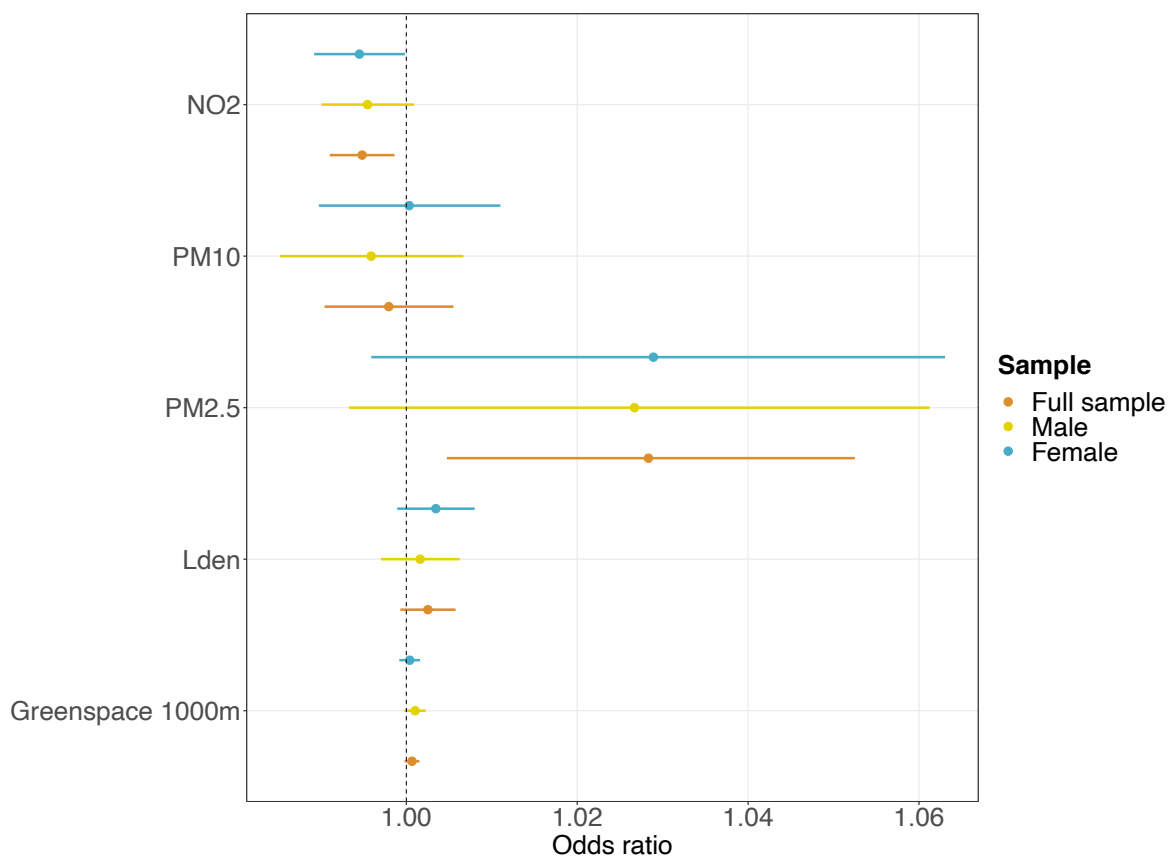

**Figure S21.** Environmental exposures associated with self-rated health, stratified by sex. Confidence interval plot (odds ratio  $\pm$  Bonferroni-adjusted (~99.9%) confidence intervals) for Model 4 (i.e. including all explanatory variables). PM = particulate matter; NO<sub>2</sub> = nitrogen dioxide; L<sub>den</sub> = day-evening-night noise level.

Tables S47-S50. Regression tables self-rated health stratified by age

Sociodemographic characteristics

| Table S47. Sociodemographic characteristics associated with self-rated health stratified by age |                  |                         |        |          |                         |        |              |                         |        |                           |                        |
|-------------------------------------------------------------------------------------------------|------------------|-------------------------|--------|----------|-------------------------|--------|--------------|-------------------------|--------|---------------------------|------------------------|
| Term                                                                                            | All participants |                         |        | Below 65 |                         |        | 65 and above |                         |        | Interaction term          |                        |
|                                                                                                 | OR               | Bonferroni-corrected CI |        | OR       | Bonferroni-corrected CI |        | OR           | Bonferroni-corrected CI |        | <i>p</i> <sub>Bonf.</sub> | <i>p</i> <sub>BH</sub> |
| <b>Household income<sup>1</sup></b>                                                             |                  |                         |        |          |                         |        |              |                         |        |                           |                        |
| Very low                                                                                        | 0.6192           | 0.5960                  | 0.6432 | 0.5873   | 0.5627                  | 0.6130 | 0.7057       | 0.6442                  | 0.7729 | <0.0001                   | <0.0001                |
| Low                                                                                             | 0.8512           | 0.8234                  | 0.8799 | 0.8561   | 0.8255                  | 0.8879 | 0.8614       | 0.7922                  | 0.9367 | 0.6464                    | 0.0249                 |
| Middle                                                                                          | Ref              | –                       | –      | Ref      | –                       | –      | Ref          | –                       | –      | –                         | –                      |
| High                                                                                            | 1.2102           | 1.1691                  | 1.2526 | 1.2062   | 1.1635                  | 1.2504 | 1.1177       | 0.9844                  | 1.2691 | 0.0288                    | 0.0014                 |
| Very high                                                                                       | 1.6364           | 1.5491                  | 1.7286 | 1.6386   | 1.5483                  | 1.7341 | 1.2259       | 0.9692                  | 1.5498 | 0.0004                    | <0.0001                |
| <b>Sex</b>                                                                                      |                  |                         |        |          |                         |        |              |                         |        |                           |                        |
| Female                                                                                          | Ref              | –                       | –      | Ref      | –                       | –      | Ref          | –                       | –      | –                         | –                      |
| Male                                                                                            | 0.7836           | 0.7648                  | 0.8030 | 0.7808   | 0.7601                  | 0.8019 | 0.8118       | 0.7643                  | 0.8622 | <0.0001                   | <0.0001                |
| <b>Age</b>                                                                                      | 1.0113           | 1.0097                  | 1.0130 | 1.0120   | 1.0010                  | 1.0140 | 0.9978       | 0.9789                  | 1.0171 | –                         | –                      |
| <b>Multiple deprivation</b>                                                                     | 0.9923           | 0.9913                  | 0.9933 | 0.9922   | 0.9911                  | 0.9933 | 0.9938       | 0.9913                  | 0.9963 | >0.9999                   | 0.8416                 |
| <b>Ethnicity</b>                                                                                |                  |                         |        |          |                         |        |              |                         |        |                           |                        |
| White                                                                                           | Ref              | –                       | –      | Ref      | –                       | –      | Ref          | –                       | –      | –                         | –                      |
| Mixed-race                                                                                      | 0.9019           | 0.7729                  | 1.0527 | 0.9212   | 0.7851                  | 1.0811 | 0.7125       | 0.3969                  | 1.2876 | >0.9999                   | 0.3609                 |
| Asian                                                                                           | 0.5995           | 0.5445                  | 0.6602 | 0.6297   | 0.5680                  | 0.6983 | 0.4443       | 0.3399                  | 0.5817 | <0.0001                   | <0.0001                |
| Black                                                                                           | 1.0896           | 0.9839                  | 1.2069 | 1.1503   | 1.0343                  | 1.2796 | 0.6069       | 0.4243                  | 0.8709 | <0.0001                   | <0.0001                |
| Chinese                                                                                         | 0.6783           | 0.5413                  | 0.8506 | 0.6780   | 0.5366                  | 0.8573 | 0.6584       | 0.2825                  | 1.5576 | >0.9999                   | 0.5891                 |
| Other                                                                                           | 0.8903           | 0.7746                  | 1.0235 | 0.9262   | 0.8005                  | 1.0719 | 0.6205       | 0.3924                  | 0.9868 | <0.0001                   | <0.0001                |
| <b>Highest qualification</b>                                                                    |                  |                         |        |          |                         |        |              |                         |        |                           |                        |
| None                                                                                            | Ref              | –                       | –      | Ref      | –                       | –      | Ref          | –                       | –      | –                         | –                      |
| O levels/GCSEs/CSEs                                                                             | 1.2420           | 1.1920                  | 1.2941 | 1.2790   | 1.2187                  | 1.3423 | 1.2593       | 1.1587                  | 1.3688 | <0.0001                   | <0.0001                |
| A levels/NVQ/HND/HNC <sup>2</sup>                                                               | 1.2876           | 1.2345                  | 1.3429 | 1.3358   | 1.2713                  | 1.4036 | 1.2424       | 1.1423                  | 1.3514 | <0.0001                   | <0.0001                |
| Degree                                                                                          | 1.5031           | 1.4412                  | 1.5676 | 1.5655   | 1.4905                  | 1.6443 | 1.4066       | 1.2878                  | 1.5364 | <0.0001                   | <0.0001                |

Note: Estimates from Model 4 (i.e. including all explanatory variables). Bonferroni-adjusted (~99.9%) confidence intervals. OR = odds ratio; CI = confidence interval; GCSEs = general certificate of secondary education; CSE = certificate of secondary education; NVQ = national vocational qualification; HND = higher national diploma; HNC = higher national certificate. For categorical explanatory variables the odds ratios indicate the changes in odds of reporting better self-rated health associated with the explanatory variable group relative to the reference group. Odds ratios for continuous explanatory variables indicate proportional odds ratios for a 1-unit increase in the explanatory variable on level of self-rated health. <sup>1</sup>Annual household income groups: very low (<£18,000), low (£18,000–£30,999), middle (£31,000–£51,999), high (£52,000–£100,000) and very high (>£100,000). <sup>2</sup>also includes 'other professional qualifications'.

Psychosocial factors

| Table S48. Psychosocial factors associated with self-rated health stratified by age |                  |                         |        |          |                         |        |              |                         |        |                  |          |
|-------------------------------------------------------------------------------------|------------------|-------------------------|--------|----------|-------------------------|--------|--------------|-------------------------|--------|------------------|----------|
| Term                                                                                | All participants |                         |        | Below 65 |                         |        | 65 and above |                         |        | Interaction term |          |
|                                                                                     | OR               | Bonferroni-corrected CI |        | OR       | Bonferroni-corrected CI |        | OR           | Bonferroni-corrected CI |        | $p_{Bonf.}$      | $p_{BH}$ |
| <b>Loneliness</b>                                                                   |                  |                         |        |          |                         |        |              |                         |        |                  |          |
| Not lonely                                                                          | Ref              | –                       | –      | Ref      | –                       | –      | Ref          | –                       | –      | –                | –        |
| Lonely                                                                              | 0.4921           | 0.4678                  | 0.5176 | 0.4853   | 0.4594                  | 0.5127 | 0.5460       | 0.4798                  | 0.6216 | 0.0016           | 0.0001   |
| <b>Social isolation</b>                                                             |                  |                         |        |          |                         |        |              |                         |        |                  |          |
| Not isolated                                                                        | Ref              | –                       | –      | Ref      | –                       | –      | Ref          | –                       | –      | –                | –        |
| Isolated                                                                            | 0.8593           | 0.8233                  | 0.8970 | 0.8528   | 0.8137                  | 0.8938 | 0.9057       | 0.8149                  | 1.0067 | 0.0334           | 0.0015   |

*Note:* Estimates from Model 4 (i.e. including all explanatory variables). Bonferroni-adjusted (~99.9%) confidence intervals. OR = odds ratio; CI = confidence interval. For categorical explanatory variables the odds ratios indicate the changes in odds of reporting better self-rated health associated with the explanatory variable group relative to the reference group.

## Lifestyle factors

| Table S49. Lifestyle factors associated with self-rated health stratified by age |                  |                         |        |          |                         |        |              |                         |        |                           |                        |
|----------------------------------------------------------------------------------|------------------|-------------------------|--------|----------|-------------------------|--------|--------------|-------------------------|--------|---------------------------|------------------------|
| Term                                                                             | All participants |                         |        | Below 65 |                         |        | 65 and above |                         |        | Interaction term          |                        |
|                                                                                  | OR               | Bonferroni-corrected CI |        | OR       | Bonferroni-corrected CI |        | OR           | Bonferroni-corrected CI |        | <i>p</i> <sub>Bonf.</sub> | <i>p</i> <sub>BH</sub> |
| <b>Sleep duration</b> (hours/day)                                                | 1.0730           | 1.0609                  | 1.0852 | 1.0790   | 1.0654                  | 1.0927 | 1.0453       | 1.0185                  | 1.0727 | 0.0193                    | 0.0010                 |
| <b>Physical activity</b> (days/week) <sup>1</sup>                                |                  |                         |        |          |                         |        |              |                         |        |                           |                        |
| Walking                                                                          | 1.0522           | 1.0454                  | 1.0591 | 1.0474   | 1.0400                  | 1.0548 | 1.0836       | 1.0652                  | 1.1024 | 0.0005                    | <0.0001                |
| Moderate activity                                                                | 1.0132           | 1.0070                  | 1.0195 | 1.0112   | 1.0044                  | 1.0181 | 1.0218       | 1.0073                  | 1.0365 | >0.9999                   | 0.3609                 |
| Vigorous activity                                                                | 1.1668           | 1.1585                  | 1.1751 | 1.1745   | 1.1652                  | 1.1839 | 1.1352       | 1.1168                  | 1.1540 | <0.0001                   | <0.0001                |
| <b>Stair climbing frequency</b>                                                  |                  |                         |        |          |                         |        |              |                         |        |                           |                        |
| None                                                                             | Ref              | –                       | –      | Ref      | –                       | –      | Ref          | –                       | –      | –                         | –                      |
| 1-5/day                                                                          | 1.0533           | 1.0019                  | 1.1074 | 1.0797   | 1.0192                  | 1.1437 | 0.9617       | 0.8660                  | 1.0679 | 0.0006                    | <0.0001                |
| 6-10/day                                                                         | 1.2293           | 1.1733                  | 1.2878 | 1.2422   | 1.1767                  | 1.3114 | 1.2165       | 1.1086                  | 1.3348 | 0.4794                    | 0.0192                 |
| 11-15/day                                                                        | 1.2892           | 1.2260                  | 1.3557 | 1.2980   | 1.2249                  | 1.3755 | 1.3092       | 1.1794                  | 1.4532 | >0.9999                   | 0.0663                 |
| 16-20/day                                                                        | 1.2991           | 1.2258                  | 1.3767 | 1.3031   | 1.2198                  | 1.3921 | 1.3533       | 1.1920                  | 1.5364 | >0.9999                   | 0.3178                 |
| 20+/day                                                                          | 1.3652           | 1.2828                  | 1.4529 | 1.3693   | 1.2767                  | 1.4687 | 1.4508       | 1.2551                  | 1.6770 | >0.9999                   | 0.0405                 |
| <b>Alcohol intake frequency</b>                                                  |                  |                         |        |          |                         |        |              |                         |        |                           |                        |
| Never                                                                            | 0.6624           | 0.6285                  | 0.6981 | 0.6645   | 0.6265                  | 0.7048 | 0.6660       | 0.5922                  | 0.7490 | 0.0324                    | 0.0015                 |
| Special occasions                                                                | 0.7565           | 0.7240                  | 0.7904 | 0.7546   | 0.7189                  | 0.7921 | 0.7807       | 0.7037                  | 0.8662 | >0.9999                   | 0.0689                 |
| 1-3/month                                                                        | 0.9201           | 0.8821                  | 0.9597 | 0.9123   | 0.8716                  | 0.9549 | 0.9756       | 0.8743                  | 1.0887 | 0.8692                    | 0.0322                 |
| 1-2/week                                                                         | Ref              | –                       | –      | Ref      | –                       | –      | Ref          | –                       | –      | –                         | –                      |
| 3-4/week                                                                         | 1.0520           | 1.0178                  | 1.0875 | 1.0384   | 1.0017                  | 1.0765 | 1.1298       | 1.0374                  | 1.2304 | >0.9999                   | 0.3609                 |
| Daily/almost daily                                                               | 1.0264           | 0.9913                  | 1.0628 | 1.0044   | 0.9665                  | 1.0437 | 1.1712       | 1.0773                  | 1.2732 | <0.0001                   | <0.0001                |
| <b>BMI</b> (kg/m <sup>2</sup> )                                                  | 0.9045           | 0.9020                  | 0.9069 | 0.9025   | 0.8999                  | 0.9052 | 0.9180       | 0.9116                  | 0.9245 | <0.0001                   | <0.0001                |
| <b>Smoking status</b>                                                            |                  |                         |        |          |                         |        |              |                         |        |                           |                        |
| Never                                                                            | Ref              | –                       | –      | Ref      | –                       | –      | Ref          | –                       | –      | –                         | –                      |
| Former                                                                           | 0.8128           | 0.7919                  | 0.8342 | 0.8170   | 0.7938                  | 0.8409 | 0.7808       | 0.7343                  | 0.8302 | >0.9999                   | 0.6825                 |
| Current                                                                          | 0.5029           | 0.4825                  | 0.5242 | 0.4964   | 0.4748                  | 0.5188 | 0.5844       | 0.5196                  | 0.6574 | <0.0001                   | <0.0001                |

*Note:* Estimates from Model 4 (i.e. including all explanatory variables). Bonferroni-adjusted (~99.9%) confidence intervals. OR = odds ratio; CI = confidence interval; BMI = body mass index. For categorical explanatory variables the odds ratios indicate the changes in odds of reporting better self-rated health associated with the explanatory variable group relative to the reference group. Odds ratios for continuous explanatory variables indicate proportional odds ratios for a 1-unit increase in the explanatory variable on level of self-rated health. <sup>1</sup>number of days per week engaging in these activities for 10+ minutes continuously.



Environmental exposures

**Table S50. Environmental exposures associated with self-rated health stratified by age**

| Term                    | All participants |                         |        | Below 65 |                         | 65 and above |                         |        | Interaction term          |                        |         |
|-------------------------|------------------|-------------------------|--------|----------|-------------------------|--------------|-------------------------|--------|---------------------------|------------------------|---------|
|                         | OR               | Bonferroni-corrected CI |        | OR       | Bonferroni-corrected CI | OR           | Bonferroni-corrected CI |        | <i>p</i> <sub>Bonf.</sub> | <i>p</i> <sub>BH</sub> |         |
| <b>PM<sub>2.5</sub></b> | 1.0283           | 1.0047                  | 1.0525 | 1.0290   | 1.0031                  | 1.0555       | 1.0195                  | 0.9631 | 1.0793                    | 0.0001                 | <0.0001 |
| <b>PM<sub>10</sub></b>  | 0.9979           | 0.9904                  | 1.0055 | 0.9959   | 0.9877                  | 1.0042       | 1.0074                  | 0.9889 | 1.0264                    | >0.9999                | 0.4056  |
| <b>NO<sub>2</sub></b>   | 0.9948           | 0.9910                  | 0.9986 | 0.9959   | 0.9917                  | 1.0000       | 0.9908                  | 0.9816 | 1.0000                    | <0.0001                | <0.0001 |
| <b>L<sub>den</sub></b>  | 1.0025           | 0.9993                  | 1.0058 | 1.0032   | 0.9996                  | 1.0067       | 0.9996                  | 0.9917 | 1.0076                    | 0.0007                 | <0.0001 |
| <b>Greenspace 1000m</b> | 1.0007           | 0.9998                  | 1.0015 | 1.0008   | 0.9999                  | 1.0018       | 1.0000                  | 0.9978 | 1.0021                    | 0.0566                 | 0.0024  |

*Note:* Estimates from Model 4 (i.e. including all explanatory variables). Bonferroni-adjusted (~99.9%) confidence intervals. OR = odds ratio; CI = confidence interval; PM = particulate matter; NO<sub>2</sub> = nitrogen dioxide; L<sub>den</sub> = day-evening-night noise level. Odds ratios indicate proportional odds ratios for a 1-unit increase in the explanatory variable on level of self-rated health.

Figures S22-S24. Confidence interval plots self-rated health stratified by age

Sociodemographic and psychosocial factors

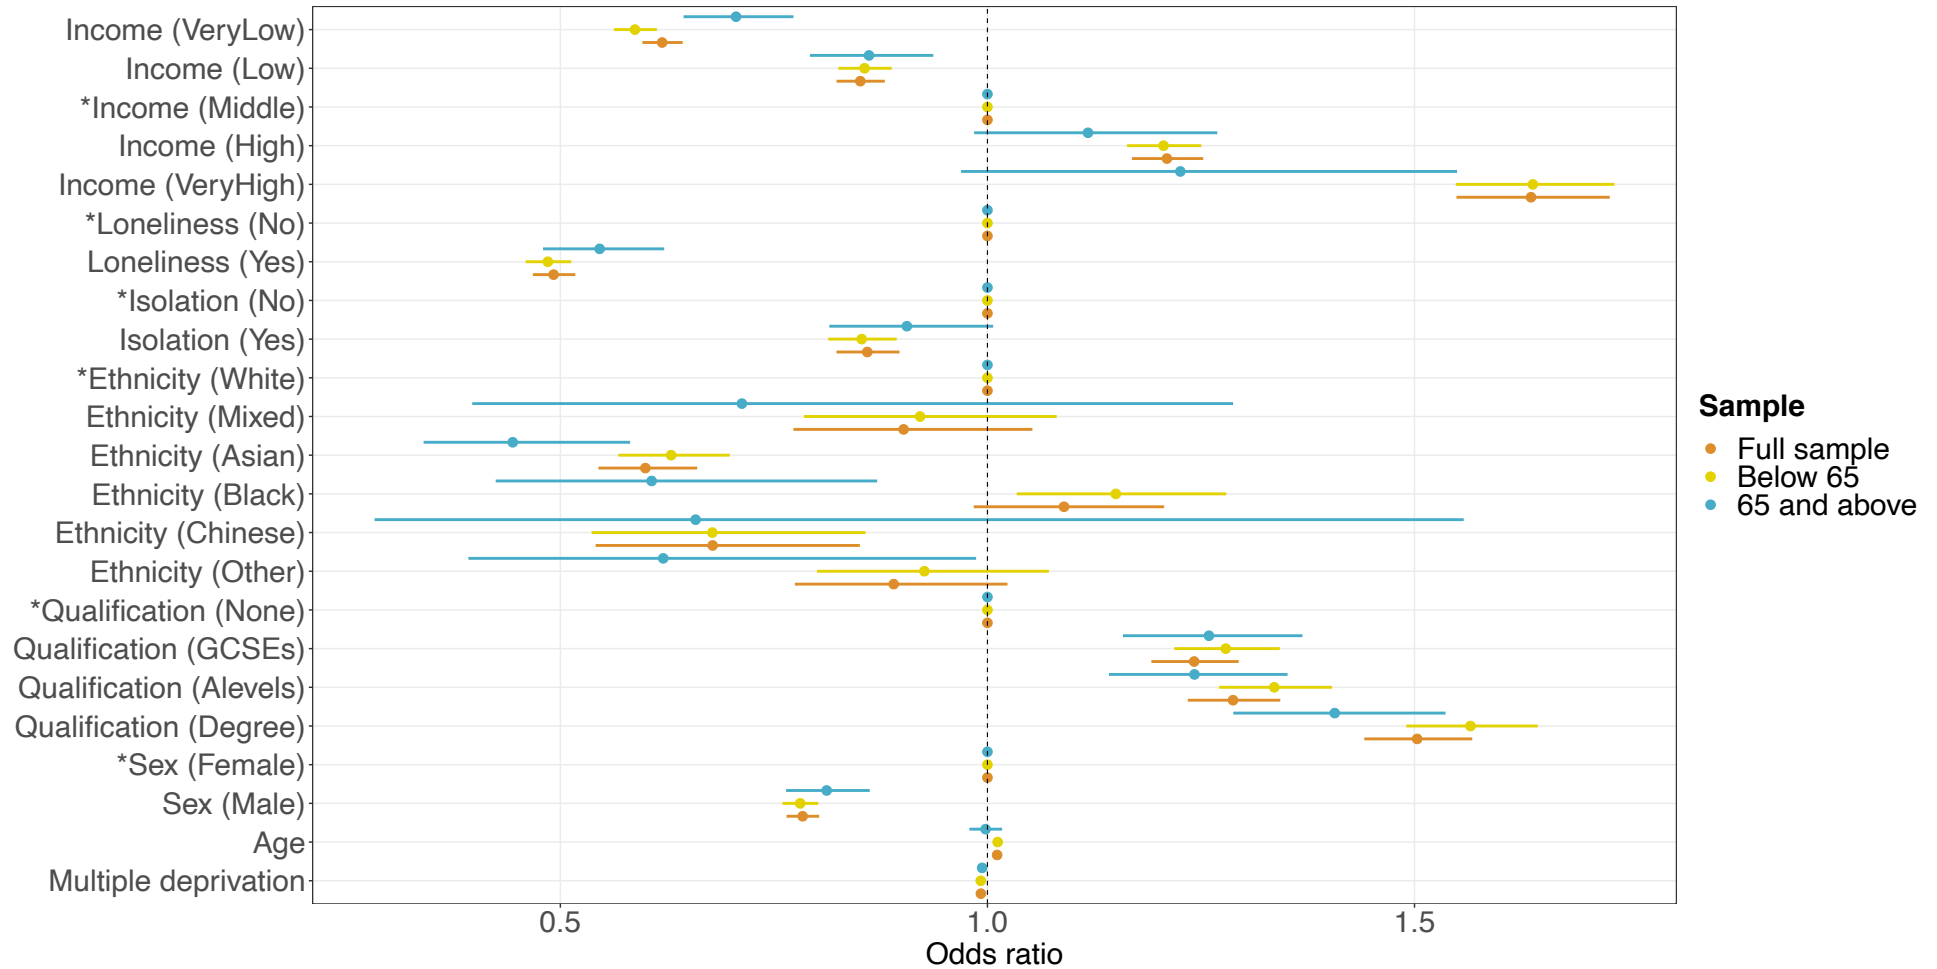

**Figure S22.** Sociodemographic characteristics and psychosocial factors associated with self-rated health, stratified by age. Confidence interval plot (odds ratio  $\pm$  Bonferroni-adjusted (~99.9%) confidence intervals) for Model 4 (i.e. including all explanatory variables). GCSEs = general certificate of secondary education. \*Indicates reference group for categorical explanatory variables. Annual household income groups: very low (<£18,000), low (£18,000–£30,999), middle (£31,000–£51,999), high (£52,000–£100,000) and very high (>£100,000). 'GCSEs' also includes O levels and certificate of secondary education (CSE). 'A levels' also includes national vocational qualification (NVQ), higher national diploma (HND), higher national certificate (HNC) and 'other professional qualifications'.

Lifestyle factors

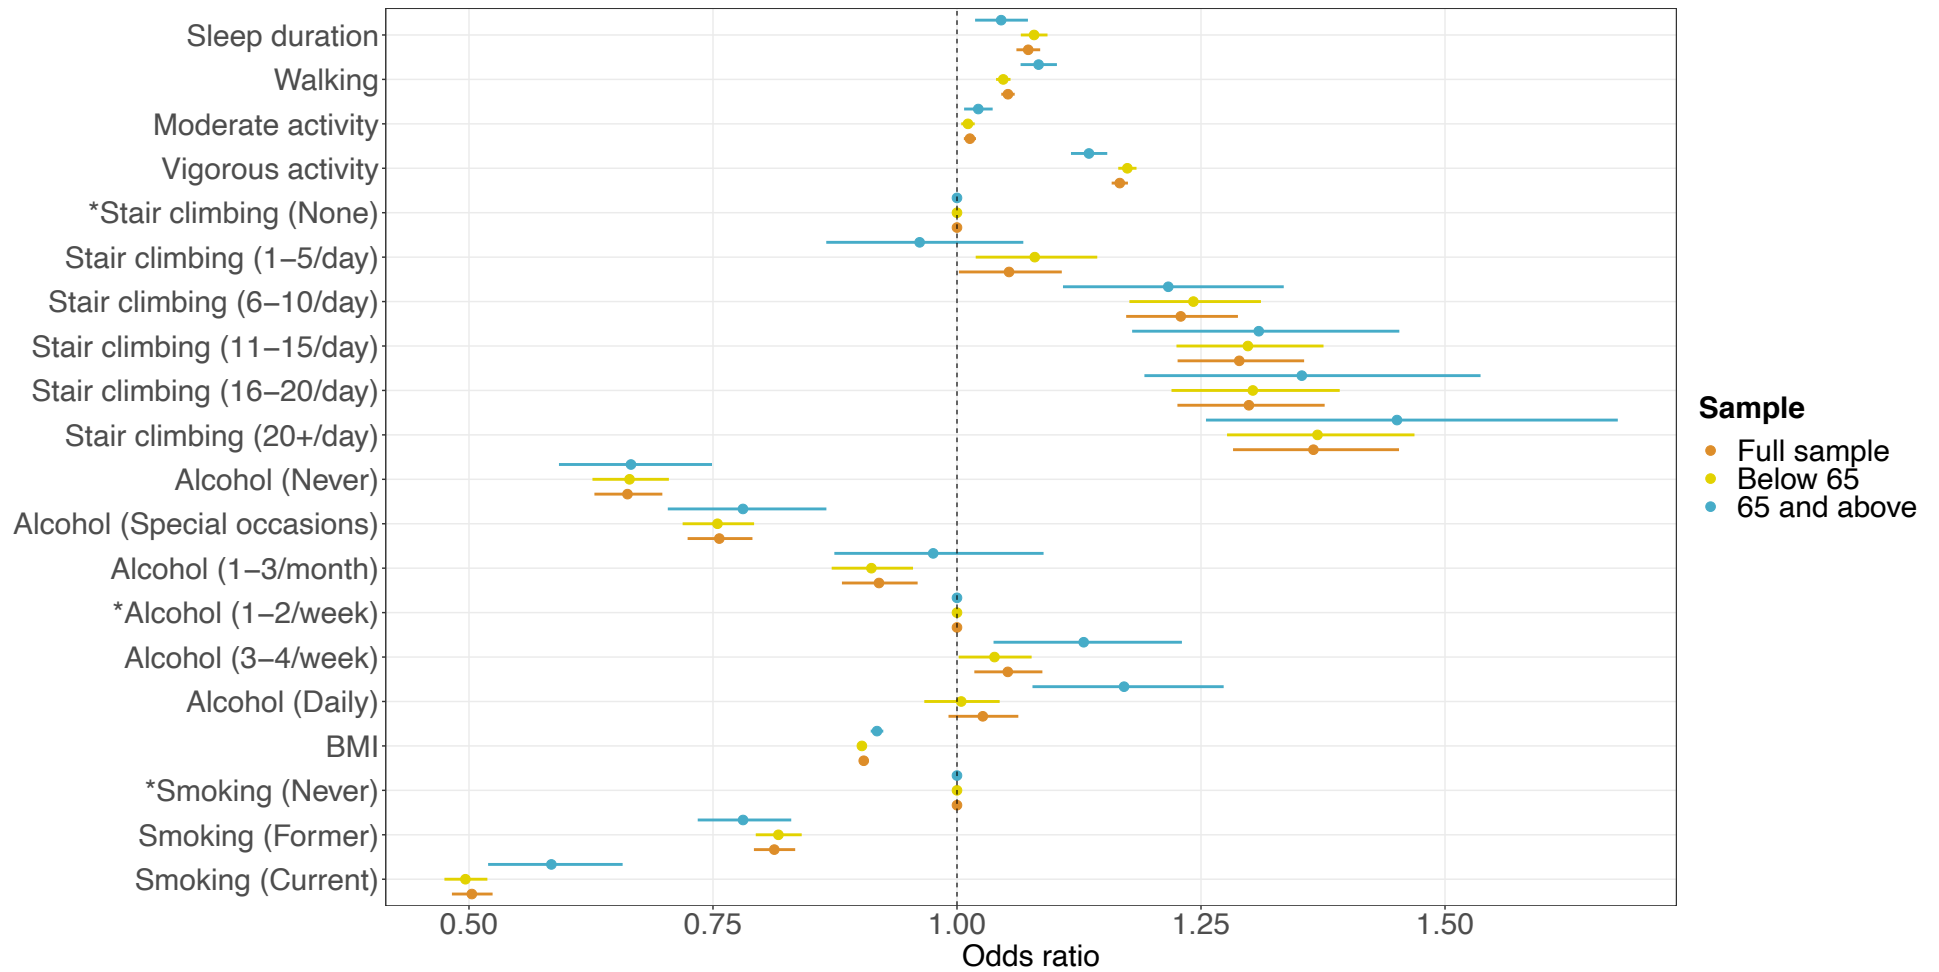

**Figure S23.** Lifestyle factors associated with self-rated health, stratified by age. Confidence interval plot (odds ratio  $\pm$  Bonferroni-adjusted (~99.9%) confidence intervals) for Model 4 (i.e. including all explanatory variables). BMI = body mass index. \*Indicates reference group for categorical explanatory variables.

Environmental exposures

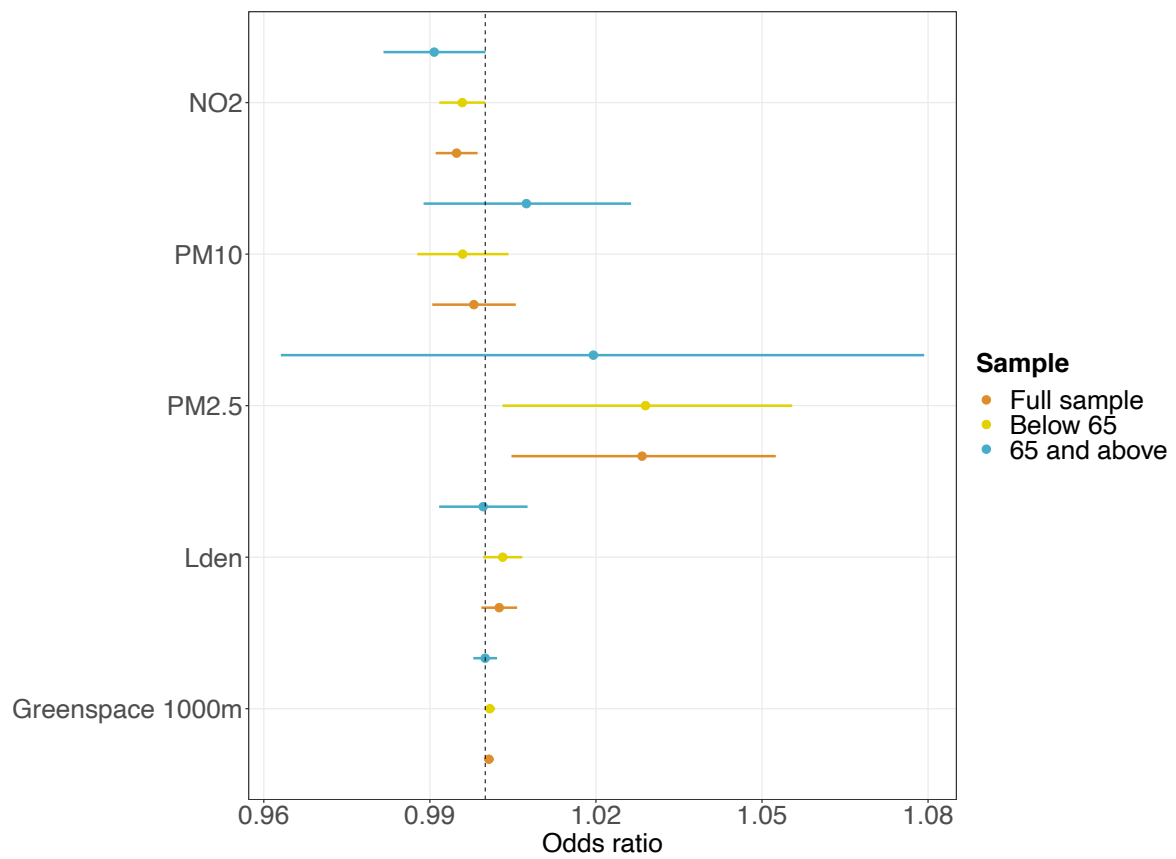

**Figure S24.** Environmental exposures associated with self-rated health, stratified by age. Confidence interval plot (odds ratio  $\pm$  Bonferroni-adjusted (~99.9%) confidence intervals) for Model 4 (i.e. including all explanatory variables). PM = particulate matter; NO<sub>2</sub> = nitrogen dioxide; L<sub>den</sub> = day-evening-night noise level.

**Table S51. Baseline characteristics longitudinal samples**

| <b>Table S51. Baseline characteristics of longitudinal samples</b> |                                    |                              |                              |
|--------------------------------------------------------------------|------------------------------------|------------------------------|------------------------------|
|                                                                    | Analytical sample<br>(N = 307 378) | Follow-up t1<br>(N = 16 058) | Follow-up t2<br>(N = 32 617) |
| <b>Self-rated health</b>                                           |                                    |                              |                              |
| Poor                                                               | 11 066 (3.6%)                      | 469 (2.9%)                   | 677 (2.1%)                   |
| Fair                                                               | 59 169 (19.2%)                     | 2 834 (17.6%)                | 5 197 (15.9%)                |
| Good                                                               | 182 699 (59.4%)                    | 9 790 (61.0%)                | 20 653 (63.3%)               |
| Excellent                                                          | 54 444 (17.7%)                     | 2 965 (18.5%)                | 6 090 (18.7%)                |
| <b>Sociodemographic characteristics</b>                            |                                    |                              |                              |
| <b>Age</b>                                                         |                                    |                              |                              |
| Mean (SD)                                                          | 56.10 (8.07)                       | 56.92 (7.39)                 | 54.84 (7.46)                 |
| Range                                                              | 38.00-73.00                        | 40.00-73.00                  | 40.00-70.00                  |
| <b>Sex</b>                                                         |                                    |                              |                              |
| Female                                                             | 159 574 (51.9%)                    | 7 951 (49.5%)                | 16 344 (50.1%)               |
| Male                                                               | 147 804 (48.1%)                    | 8 107 (50.5%)                | 16 273 (49.9%)               |
| <b>Ethnicity</b>                                                   |                                    |                              |                              |
| White                                                              | 293 565 (95.5%)                    | 15 748 (98.1%)               | 31 768 (97.4%)               |
| Mixed-race                                                         | 1 766 (0.6%)                       | 58 (0.4%)                    | 139 (0.4%)                   |
| Black                                                              | 4 257 (1.4%)                       | 63 (0.4%)                    | 191 (0.6%)                   |
| Asian                                                              | 4 755 (1.5%)                       | 84 (0.5%)                    | 298 (0.9%)                   |
| Chinese                                                            | 818 (0.3%)                         | 37 (0.2%)                    | 82 (0.3%)                    |
| Other                                                              | 2 217 (0.7%)                       | 68 (0.4%)                    | 139 (0.4%)                   |
| <b>Highest qualification</b>                                       |                                    |                              |                              |
| None                                                               | 39 828 (13.0%)                     | 1 156 (7.2%)                 | 1 854 (5.7%)                 |
| O levels/GCSEs/CSEs                                                | 84 448 (27.5%)                     | 3 620 (22.5%)                | 7 748 (23.8%)                |
| A levels/NVQ/HND/HNC <sup>1</sup>                                  | 72 584 (23.6%)                     | 3 819 (23.8%)                | 7 608 (23.3%)                |
| Degree                                                             | 110 518 (36.0%)                    | 7 463 (46.5%)                | 15 407 (47.2%)               |
| <b>Household income<sup>2</sup></b>                                |                                    |                              |                              |
| Very low                                                           | 82 338 (26.8%)                     | 4 679 (29.1%)                | 9 910 (30.4%)                |
| Low                                                                | 63 099 (20.5%)                     | 2 562 (16.0%)                | 3 824 (11.7%)                |
| Medium                                                             | 77 931 (25.4%)                     | 4 412 (27.5%)                | 7 308 (22.4%)                |
| High                                                               | 66 106 (21.5%)                     | 3 595 (22.4%)                | 9 231 (28.3%)                |
| Very high                                                          | 17 904 (5.8%)                      | 810 (5.0%)                   | 2 344 (7.2%)                 |
| <b>Multiple deprivation</b>                                        |                                    |                              |                              |
| Mean (SD)                                                          | 16.77 (13.33)                      | 16.51 (12.93)                | 15.49 (12.16)                |
| Range                                                              | 0.61-82.00                         | 1.12-81.59                   | 0.61-81.59                   |
| <b>Psychosocial factors</b>                                        |                                    |                              |                              |
| <b>Loneliness</b>                                                  |                                    |                              |                              |
| Not lonely                                                         | 289 901 (94.3%)                    | 15 303 (95.3%)               | 31 145 (95.5%)               |
| Lonely                                                             | 17 477 (5.7%)                      | 755 (4.7%)                   | 1 472 (4.5%)                 |
| <b>Social isolation</b>                                            |                                    |                              |                              |
| Not isolated                                                       | 280 931 (91.4%)                    | 14 930 (93.0%)               | 30 337 (93.0%)               |
| Isolated                                                           | 26 447 (8.6%)                      | 1 128 (7.0%)                 | 2 280 (7.0%)                 |
| <b>Lifestyle factors</b>                                           |                                    |                              |                              |
| <b>Smoking status</b>                                              |                                    |                              |                              |
| Never                                                              | 168 475 (54.8%)                    | 9 478 (59.0%)                | 19 674 (60.3%)               |
| Former                                                             | 108 638 (35.3%)                    | 5 596 (34.8%)                | 10 910 (33.4%)               |
| Current                                                            | 30 265 (9.8%)                      | 984 (6.1%)                   | 2 033 (6.2%)                 |
| <b>Stair climbing frequency</b>                                    |                                    |                              |                              |
| None                                                               | 24 049 (7.8%)                      | 1 042 (6.5%)                 | 1 977 (6.1%)                 |
| 1-5/day                                                            | 58 267 (19.0%)                     | 2 670 (16.6%)                | 5 476 (16.8%)                |
| 6-10/day                                                           | 115 982 (37.7%)                    | 6 165 (38.4%)                | 12 777 (39.2%)               |
| 11-15/day                                                          | 60 315 (19.6%)                     | 3 421 (21.3%)                | 6 939 (21.3%)                |
| 16-20/day                                                          | 27 609 (9.0%)                      | 1 600 (10.0%)                | 3 141 (9.6%)                 |
| 20+/day                                                            | 21 156 (6.9%)                      | 1 160 (7.2%)                 | 2 307 (7.1%)                 |
| <b>Alcohol intake frequency</b>                                    |                                    |                              |                              |
| Never                                                              | 78 777 (25.6%)                     | 3 978 (24.8%)                | 8 327 (25.5%)                |
| Special occasions                                                  | 20 423 (6.6%)                      | 822 (5.1%)                   | 1 457 (4.5%)                 |
| 1-3/month                                                          | 31 526 (10.3%)                     | 1 343 (8.4%)                 | 2 569 (7.9%)                 |
| 1-2/week                                                           | 33 798 (11.0%)                     | 1 699 (10.6%)                | 3 514 (10.8%)                |
| 3-4/week                                                           | 75 251 (24.5%)                     | 4 496 (28.0%)                | 9 291 (28.5%)                |
| Daily/almost daily                                                 | 67 603 (22.0%)                     | 3 720 (23.2%)                | 7 459 (22.9%)                |
| <b>Sleep duration (hours/day)</b>                                  |                                    |                              |                              |
| Mean (SD)                                                          | 7.16 (1.06)                        | 7.20 (0.98)                  | 7.16 (0.96)                  |
| Range                                                              | 1.00-20.00                         | 1.00-15.00                   | 1.00-18.00                   |
| <b>BMI (kg/m<sup>2</sup>)</b>                                      |                                    |                              |                              |
| Mean (SD)                                                          | 27.27 (4.66)                       | 26.83 (4.46)                 | 26.68 (4.27)                 |
| Range                                                              | 12.80-67.30                        | 15.80-56.60                  | 15.20-63.60                  |
| <b>Walking (days/week)<sup>3</sup></b>                             |                                    |                              |                              |
| Mean (SD)                                                          | 5.36 (1.95)                        | 5.17 (2.02)                  | 5.21 (2.00)                  |
| Range                                                              | 0.00-7.00                          | 0.00-7.00                    | 0.00-7.00                    |
| <b>Moderate activity (days/week)<sup>3</sup></b>                   |                                    |                              |                              |
| Mean (SD)                                                          | 3.59 (2.32)                        | 3.45 (2.28)                  | 3.44 (2.26)                  |
| Range                                                              | 0.00-7.00                          | 0.00-7.00                    | 0.00-7.00                    |
| <b>Vigorous activity (days/week)<sup>3</sup></b>                   |                                    |                              |                              |
| Mean (SD)                                                          | 1.88 (1.94)                        | 1.83 (1.85)                  | 1.89 (1.84)                  |
| Range                                                              | 0.00-7.00                          | 0.00-7.00                    | 0.00-7.00                    |

| Environmental exposures |               |               |               |
|-------------------------|---------------|---------------|---------------|
| <b>PM<sub>2.5</sub></b> |               |               |               |
| Mean (SD)               | 9.95 (1.04)   | 9.96 (1.03)   | 9.92 (1.04)   |
| Range                   | 8.17-21.25    | 8.17-19.65    | 8.17-19.65    |
| <b>PM<sub>10</sub></b>  |               |               |               |
| Mean (SD)               | 16.19 (1.88)  | 15.92 (1.85)  | 16.00 (1.85)  |
| Range                   | 11.78-30.65   | 11.78-25.38   | 11.78-26.33   |
| <b>NO<sub>2</sub></b>   |               |               |               |
| Mean (SD)               | 26.43 (7.56)  | 25.99 (6.68)  | 25.72 (7.15)  |
| Range                   | 12.93-108.49  | 12.93-89.08   | 12.93-89.55   |
| <b>L<sub>den</sub></b>  |               |               |               |
| Mean (SD)               | 56.01 (4.24)  | 56.12 (4.33)  | 55.98 (4.19)  |
| Range                   | 51.55-89.29   | 51.57-81.36   | 51.56-81.67   |
| <b>Greenspace 1000m</b> |               |               |               |
| Mean (SD)               | 45.52 (21.77) | 48.37 (20.62) | 47.95 (21.77) |
| Range                   | 4.49-99.19    | 8.90-98.29    | 4.96-98.98    |

*Note:* All variables assessed at baseline except self-rated health in the third and fourth column assessed at t1 and t2, respectively. GCSEs = general certificate of secondary education; CSE = certificate of secondary education; NVQ = national vocational qualification; HND = higher national diploma; HNC = higher national certificate; BMI = body mass index; PM = particulate matter; NO<sub>2</sub> = nitrogen dioxide; L<sub>den</sub> = day-evening-night noise level. <sup>1</sup>also includes 'other professional qualifications'. <sup>2</sup>Annual household income groups: very low (<£18,000), low (£18,000–£30,999), middle (£31,000–£51,999), high (£52,000–£100,000) and very high (>£100,000). <sup>3</sup>number of days per week engaging in these activities for 10+ minutes continuously.

Tables S52-S55. Regression tables self-rated health t1

Sociodemographic characteristics

| Table S52. Sociodemographic characteristics at baseline associated with self-rated health at t1 |         |                         |        |         |                         |        |         |                         |        |         |                         |        |
|-------------------------------------------------------------------------------------------------|---------|-------------------------|--------|---------|-------------------------|--------|---------|-------------------------|--------|---------|-------------------------|--------|
| Term                                                                                            | Model 1 |                         |        | Model 2 |                         |        | Model 3 |                         |        | Model 4 |                         |        |
|                                                                                                 | OR      | Bonferroni-corrected CI |        | OR      | Bonferroni-corrected CI |        | OR      | Bonferroni-corrected CI |        | OR      | Bonferroni-corrected CI |        |
| <b>Household income<sup>1</sup></b>                                                             |         |                         |        |         |                         |        |         |                         |        |         |                         |        |
| Very low                                                                                        | 0.6337  | 0.5411                  | 0.7421 | 0.6173  | 0.5256                  | 0.7251 | 0.6989  | 0.5919                  | 0.8253 | 0.7396  | 0.6234                  | 0.8773 |
| Low                                                                                             | 0.8404  | 0.7346                  | 0.9613 | 0.8254  | 0.7201                  | 0.9461 | 0.8649  | 0.7539                  | 0.9922 | 0.8789  | 0.7645                  | 1.0103 |
| Middle                                                                                          | Ref     | –                       | –      | Ref     | –                       | –      | Ref     | –                       | –      | Ref     | –                       | –      |
| High                                                                                            | 1.3217  | 1.1460                  | 1.5244 | 1.3423  | 1.1625                  | 1.5501 | 1.2605  | 1.0901                  | 1.4577 | 1.2876  | 1.1111                  | 1.4924 |
| Very high                                                                                       | 1.7091  | 1.3381                  | 2.1817 | 1.7355  | 1.3573                  | 2.2179 | 1.5644  | 1.2200                  | 2.0046 | 1.5147  | 1.1769                  | 1.9488 |
| <b>Sex</b>                                                                                      |         |                         |        |         |                         |        |         |                         |        |         |                         |        |
| Female                                                                                          | Ref     | –                       | –      | Ref     | –                       | –      | Ref     | –                       | –      | Ref     | –                       | –      |
| Male                                                                                            | 0.8676  | 0.7842                  | 0.9598 | –       | –                       | –      | 0.8471  | 0.7647                  | 0.9384 | 0.8864  | 0.7965                  | 0.9862 |
| <b>Age</b>                                                                                      | 0.9905  | 0.9837                  | 0.9974 | –       | –                       | –      | 1.0019  | 0.9943                  | 1.0095 | 1.0006  | 0.9927                  | 1.0085 |
| <b>Multiple deprivation</b>                                                                     | 0.9853  | 0.9814                  | 0.9892 | 0.9847  | 0.9808                  | 0.9887 | 0.9898  | 0.9857                  | 0.9939 | 0.9964  | 0.9920                  | 1.0009 |
| <b>Ethnicity</b>                                                                                |         |                         |        |         |                         |        |         |                         |        |         |                         |        |
| White                                                                                           | Ref     | –                       | –      | Ref     | –                       | –      | Ref     | –                       | –      | Ref     | –                       | –      |
| Mixed-race                                                                                      | 0.5693  | 0.2410                  | 1.3718 | 0.5348  | 0.2258                  | 1.2915 | 0.5679  | 0.2393                  | 1.3722 | 0.7006  | 0.2942                  | 1.6803 |
| Asian                                                                                           | 0.6917  | 0.3451                  | 1.4062 | 0.6640  | 0.3309                  | 1.3514 | 0.6670  | 0.3333                  | 1.3501 | 0.6824  | 0.3359                  | 1.3994 |
| Black                                                                                           | 0.9514  | 0.4177                  | 2.1879 | 0.8885  | 0.3899                  | 2.0446 | 1.1738  | 0.5123                  | 2.7163 | 1.5064  | 0.6503                  | 3.5222 |
| Chinese                                                                                         | 0.8760  | 0.3190                  | 2.4515 | 0.8202  | 0.2984                  | 2.2975 | 0.8894  | 0.3215                  | 2.5053 | 0.7685  | 0.2734                  | 2.1899 |
| Other                                                                                           | 0.6262  | 0.2924                  | 1.3657 | 0.6158  | 0.2876                  | 1.3422 | 0.5860  | 0.2735                  | 1.2727 | 0.6499  | 0.2965                  | 1.4386 |
| <b>Highest qualification</b>                                                                    |         |                         |        |         |                         |        |         |                         |        |         |                         |        |
| None                                                                                            | Ref     | –                       | –      | Ref     | –                       | –      | Ref     | –                       | –      | Ref     | –                       | –      |
| O levels/GCSEs/CSEs                                                                             | 1.2827  | 1.0335                  | 1.5911 | 1.2291  | 0.9870                  | 1.5296 | 1.1175  | 0.8956                  | 1.3935 | 1.0969  | 0.8765                  | 1.3722 |
| A levels/NVQ/HND/HNC <sup>2</sup>                                                               | 1.3799  | 1.1130                  | 1.7098 | 1.3360  | 1.0748                  | 1.6597 | 1.1622  | 0.9321                  | 1.4484 | 1.1282  | 0.9018                  | 1.4110 |
| Degree                                                                                          | 1.8163  | 1.4821                  | 2.2247 | 1.7446  | 1.4179                  | 2.1455 | 1.4018  | 1.1328                  | 1.7340 | 1.2253  | 0.9856                  | 1.5230 |

Note: Bonferroni-adjusted (~99.9%) confidence intervals. OR = odds ratio; CI = confidence interval; GCSEs = general certificate of secondary education; CSE = certificate of secondary education; NVQ = national vocational qualification; HND = higher national diploma; HNC = higher national certificate. For categorical explanatory variables the odds ratios indicate the changes in odds of reporting better self-rated health associated with the explanatory variable group relative to the reference group. Odds ratios for continuous explanatory variables indicate proportional odds ratios for a 1-unit increase in the explanatory variable on level of self-rated health. <sup>1</sup>Annual household income groups: very low (<£18,000), low (£18,000–£30,999), middle (£31,000–£51,999), high (£52,000–£100,000) and very high (>£100,000). <sup>2</sup>also includes 'other professional qualifications'. Model 1 – only individual explanatory variables; Model 2 – adjusted for age and sex; Model 3 – age, sex and all sociodemographic characteristics. Model 4 – all explanatory variables. \*All models adjusted for number of days between t0 and t1.

Psychosocial factors

| Table S53. Psychosocial factors at baseline associated with self-rated health at t1 |         |                         |        |         |                         |        |         |                         |        |         |                         |        |
|-------------------------------------------------------------------------------------|---------|-------------------------|--------|---------|-------------------------|--------|---------|-------------------------|--------|---------|-------------------------|--------|
| Term                                                                                | Model 1 |                         |        | Model 2 |                         |        | Model 3 |                         |        | Model 4 |                         |        |
|                                                                                     | OR      | Bonferroni-corrected CI |        | OR      | Bonferroni-corrected CI |        | OR      | Bonferroni-corrected CI |        | OR      | Bonferroni-corrected CI |        |
| <b>Loneliness</b>                                                                   |         |                         |        |         |                         |        |         |                         |        |         |                         |        |
| Not lonely                                                                          | Ref     | –                       | –      | Ref     | –                       | –      | Ref     | –                       | –      | Ref     | –                       | –      |
| Lonely                                                                              | 0.4145  | 0.3277                  | 0.5249 | 0.4120  | 0.3256                  | 0.5218 | 0.4342  | 0.3427                  | 0.5508 | 0.5321  | 0.4178                  | 0.6782 |
| <b>Social isolation</b>                                                             |         |                         |        |         |                         |        |         |                         |        |         |                         |        |
| Not isolated                                                                        | Ref     | –                       | –      | Ref     | –                       | –      | Ref     | –                       | –      | Ref     | –                       | –      |
| Isolated                                                                            | 0.5918  | 0.4851                  | 0.7225 | 0.5928  | 0.4857                  | 0.7240 | 0.6339  | 0.5187                  | 0.7751 | 0.8688  | 0.7065                  | 1.0688 |

*Note:* Bonferroni-adjusted (~99.9%) confidence intervals. OR = odds ratio; CI = confidence interval. Odds ratios indicate the changes in odds of reporting better self-rated health associated with the explanatory variable group relative to the reference group.

Model 1 – only individual explanatory variables.

Model 2 – adjusted for age and sex.

Model 3 – age, sex and all psychosocial factors.

Model 4 – all explanatory variables.

\*All models adjusted for number of days between t0 and t1.



## Lifestyle factors

| Table S54. Lifestyle factors at baseline associated with self-rated health at t1 |         |                         |        |         |                         |        |         |                         |        |         |                         |        |
|----------------------------------------------------------------------------------|---------|-------------------------|--------|---------|-------------------------|--------|---------|-------------------------|--------|---------|-------------------------|--------|
| Term                                                                             | Model 1 |                         |        | Model 2 |                         |        | Model 3 |                         |        | Model 4 |                         |        |
|                                                                                  | OR      | Bonferroni-corrected CI |        | OR      | Bonferroni-corrected CI |        | OR      | Bonferroni-corrected CI |        | OR      | Bonferroni-corrected CI |        |
| <b>Sleep duration</b> (hours/day)                                                | 1.0941  | 1.0380                  | 1.1534 | 1.0998  | 1.0431                  | 1.1595 | 1.0957  | 1.0391                  | 1.1553 | 1.1018  | 1.0447                  | 1.1621 |
| <b>Physical activity</b> (days/week) <sup>1</sup>                                |         |                         |        |         |                         |        |         |                         |        |         |                         |        |
| Walking                                                                          | 1.0986  | 1.0711                  | 1.1268 | 1.1016  | 1.0740                  | 1.1300 | 1.0518  | 1.0233                  | 1.0812 | 1.0589  | 1.0300                  | 1.0886 |
| Moderate activity                                                                | 1.0855  | 1.0615                  | 1.1100 | 1.0893  | 1.0651                  | 1.1141 | 0.9987  | 0.9718                  | 1.0264 | 1.0083  | 0.9809                  | 1.0364 |
| Vigorous activity                                                                | 1.1803  | 1.1478                  | 1.2138 | 1.1857  | 1.1528                  | 1.2195 | 1.1389  | 1.1023                  | 1.1768 | 1.1313  | 1.0947                  | 1.1691 |
| <b>Stair climbing frequency</b>                                                  |         |                         |        |         |                         |        |         |                         |        |         |                         |        |
| None                                                                             | Ref     | –                       | –      | Ref     | –                       | –      | Ref     | –                       | –      | Ref     | –                       | –      |
| 1-5/day                                                                          | 0.9367  | 0.7417                  | 1.1823 | 0.9110  | 0.7204                  | 1.1514 | 0.9620  | 0.7593                  | 1.2185 | 0.9228  | 0.7272                  | 1.1707 |
| 6-10/day                                                                         | 1.3028  | 1.0521                  | 1.6122 | 1.2673  | 1.0224                  | 1.5701 | 1.1913  | 0.9592                  | 1.4790 | 1.1083  | 0.8904                  | 1.3791 |
| 11-15/day                                                                        | 1.5277  | 1.2186                  | 1.9146 | 1.4856  | 1.1840                  | 1.8635 | 1.2798  | 1.0175                  | 1.6093 | 1.1678  | 0.9259                  | 1.4725 |
| 16-20/day                                                                        | 1.5523  | 1.2038                  | 2.0013 | 1.5070  | 1.1676                  | 1.9445 | 1.2351  | 0.9544                  | 1.5981 | 1.1308  | 0.8714                  | 1.4673 |
| 20+/day                                                                          | 1.7904  | 1.3621                  | 2.3528 | 1.7285  | 1.3137                  | 2.2738 | 1.3282  | 1.0055                  | 1.7543 | 1.2175  | 0.9191                  | 1.6126 |
| <b>Alcohol intake frequency</b>                                                  |         |                         |        |         |                         |        |         |                         |        |         |                         |        |
| Never                                                                            | 0.6707  | 0.5239                  | 0.8592 | 0.6636  | 0.5182                  | 0.8506 | 0.6424  | 0.5005                  | 0.8247 | 0.7134  | 0.5541                  | 0.9188 |
| Special occasions                                                                | 0.6566  | 0.5369                  | 0.8034 | 0.6363  | 0.5197                  | 0.7793 | 0.6974  | 0.5682                  | 0.8562 | 0.7828  | 0.6362                  | 0.9634 |
| 1-3/month                                                                        | 0.7801  | 0.6480                  | 0.9392 | 0.7642  | 0.6346                  | 0.9204 | 0.7803  | 0.6470                  | 0.9411 | 0.8287  | 0.6864                  | 1.0006 |
| 1-2/week                                                                         | Ref     | –                       | –      | Ref     | –                       | –      | Ref     | –                       | –      | Ref     | –                       | –      |
| 3-4/week                                                                         | 1.1624  | 1.0113                  | 1.3362 | 1.1800  | 1.0265                  | 1.3567 | 1.1079  | 0.9619                  | 1.2760 | 1.0416  | 0.9034                  | 1.2010 |
| Daily/almost daily                                                               | 1.0895  | 0.9415                  | 1.2607 | 1.1385  | 0.9828                  | 1.3189 | 1.1093  | 0.9548                  | 1.2889 | 1.0369  | 0.8910                  | 1.2067 |
| <b>BMI</b> (kg/m <sup>2</sup> )                                                  | 0.8924  | 0.8820                  | 0.9029 | 0.8931  | 0.8827                  | 0.9036 | 0.9063  | 0.8954                  | 0.9172 | 0.9091  | 0.8981                  | 0.9202 |
| <b>Smoking status</b>                                                            |         |                         |        |         |                         |        |         |                         |        |         |                         |        |
| Never                                                                            | Ref     | –                       | –      | Ref     | –                       | –      | Ref     | –                       | –      | Ref     | –                       | –      |
| Former                                                                           | 0.7472  | 0.6705                  | 0.8327 | 0.7679  | 0.6880                  | 0.8570 | 0.7844  | 0.7007                  | 0.8779 | 0.8176  | 0.7296                  | 0.9161 |
| Current                                                                          | 0.4688  | 0.3785                  | 0.5811 | 0.4708  | 0.3799                  | 0.5839 | 0.4588  | 0.3688                  | 0.5711 | 0.5221  | 0.4186                  | 0.6516 |

Note: Bonferroni-adjusted (~99.9%) confidence intervals. OR = odds ratio; CI = confidence interval; BMI = body mass index. For categorical explanatory variables the odds ratios indicate the changes in odds of reporting better self-rated health associated with the explanatory variable group relative to the reference group. Odds ratios for continuous explanatory variables indicate proportional odds ratios for a 1-unit increase in the explanatory variable on level of self-rated health. <sup>1</sup>number of days per week engaging in these activities for 10+ minutes continuously.

Model 1 – only individual explanatory variables; Model 2 – adjusted for age and sex; Model 3 – age, sex and all lifestyle factors; Model 4 – all explanatory variables. \*All models adjusted for number of days between t0 and t1.

Environmental exposures

Table S55. Environmental exposures at baseline associated with self-rated health at t1

| Term                    | Model 1 |                         | Model 2 |                         | Model 3 |                         | Model 4 |                         |        |        |        |       |
|-------------------------|---------|-------------------------|---------|-------------------------|---------|-------------------------|---------|-------------------------|--------|--------|--------|-------|
|                         | OR      | Bonferroni-corrected CI | OR      | Bonferroni-corrected CI | OR      | Bonferroni-corrected CI | OR      | Bonferroni-corrected CI |        |        |        |       |
| <b>PM<sub>2.5</sub></b> | 0.9111  | 0.8667                  | 0.9579  | 0.9046                  | 0.8603  | 0.9511                  | 0.9980  | 0.8929                  | 1.1158 | 1.0122 | 0.9023 | 1.136 |
| <b>PM<sub>10</sub></b>  | 0.9648  | 0.9386                  | 0.9918  | 0.9636                  | 0.9374  | 0.9906                  | 0.9868  | 0.9536                  | 1.0213 | 0.9942 | 0.9601 | 1.030 |
| <b>NO<sub>2</sub></b>   | 0.9844  | 0.9766                  | 0.9923  | 0.9831                  | 0.9753  | 0.9910                  | 0.9716  | 0.9536                  | 0.9899 | 0.9896 | 0.9703 | 1.009 |
| <b>L<sub>den</sub></b>  | 0.9928  | 0.9814                  | 1.0044  | 0.9924                  | 0.9810  | 1.0040                  | 1.0078  | 0.9943                  | 1.0215 | 1.0025 | 0.9888 | 1.016 |
| <b>Greenspace 1000m</b> | 1.0015  | 0.9989                  | 1.0040  | 1.0018                  | 0.9992  | 1.0044                  | 0.9956  | 0.9917                  | 0.9995 | 0.9975 | 0.9935 | 1.001 |

Note: Bonferroni-adjusted (~99.9%) confidence intervals. OR = odds ratio; CI = confidence interval; PM = particulate matter; NO<sub>2</sub> = nitrogen dioxide; L<sub>den</sub> = day-evening-night noise level. Odds ratios for continuous explanatory variables indicate proportional odds ratios for a 1-unit increase in the explanatory variable on level of self-rated health.

Model 1 – only individual explanatory variables.

Model 2 – adjusted for age and sex.

Model 3 – age, sex and all environmental exposures.

Model 4 – all explanatory variables.

\*All models adjusted for number of days between t0 and t1.

Tables S56-S59. Regression tables self-rated health t2

Sociodemographic characteristics

| Table S56. Sociodemographic characteristics at baseline associated with self-rated health at t2 |         |                         |        |         |                         |        |         |                         |        |         |                         |        |
|-------------------------------------------------------------------------------------------------|---------|-------------------------|--------|---------|-------------------------|--------|---------|-------------------------|--------|---------|-------------------------|--------|
| Term                                                                                            | Model 1 |                         |        | Model 2 |                         |        | Model 3 |                         |        | Model 4 |                         |        |
|                                                                                                 | OR      | Bonferroni-corrected CI |        | OR      | Bonferroni-corrected CI |        | OR      | Bonferroni-corrected CI |        | OR      | Bonferroni-corrected CI |        |
| <b>Household income<sup>1</sup></b>                                                             |         |                         |        |         |                         |        |         |                         |        |         |                         |        |
| Very low                                                                                        | 0.6433  | 0.5680                  | 0.7288 | 0.6003  | 0.5291                  | 0.6812 | 0.6968  | 0.6120                  | 0.7934 | 0.7042  | 0.6166                  | 0.8041 |
| Low                                                                                             | 0.8741  | 0.7905                  | 0.9666 | 0.8314  | 0.7510                  | 0.9204 | 0.8841  | 0.7981                  | 0.9795 | 0.8647  | 0.7795                  | 0.9591 |
| Middle                                                                                          | Ref     | –                       | –      | Ref     | –                       | –      | Ref     | –                       | –      | Ref     | –                       | –      |
| High                                                                                            | 1.2214  | 1.1114                  | 1.3423 | 1.2625  | 1.1482                  | 1.3884 | 1.1683  | 1.0612                  | 1.2863 | 1.1531  | 1.0460                  | 1.2713 |
| Very high                                                                                       | 1.7805  | 1.5338                  | 2.0665 | 1.8603  | 1.6013                  | 2.1608 | 1.6382  | 1.4068                  | 1.9073 | 1.5583  | 1.3344                  | 1.8196 |
| <b>Sex</b>                                                                                      |         |                         |        |         |                         |        |         |                         |        |         |                         |        |
| Female                                                                                          | Ref     | –                       | –      | Ref     | –                       | –      | Ref     | –                       | –      | Ref     | –                       | –      |
| Male                                                                                            | 0.8796  | 0.8184                  | 0.9453 | –       | –                       | –      | 0.8331  | 0.7742                  | 0.8964 | 0.9112  | 0.8441                  | 0.9836 |
| <b>Age</b>                                                                                      | 1.0027  | 0.9978                  | 1.0076 | –       | –                       | –      | 1.0106  | 1.0053                  | 1.0160 | 1.0121  | 1.0065                  | 1.0176 |
| <b>Multiple deprivation</b>                                                                     | 0.9833  | 0.9804                  | 0.9862 | 0.9833  | 0.9803                  | 0.9862 | 0.9890  | 0.9859                  | 0.9921 | 0.9947  | 0.9914                  | 0.9981 |
| <b>Ethnicity</b>                                                                                |         |                         |        |         |                         |        |         |                         |        |         |                         |        |
| White                                                                                           | Ref     | –                       | –      | Ref     | –                       | –      | Ref     | –                       | –      | Ref     | –                       | –      |
| Mixed-race                                                                                      | 0.9761  | 0.5584                  | 1.7081 | 0.9690  | 0.5542                  | 1.6963 | 1.0192  | 0.5869                  | 1.7728 | 1.0936  | 0.6267                  | 1.9098 |
| Asian                                                                                           | 0.5379  | 0.3710                  | 0.7837 | 0.5578  | 0.3844                  | 0.8132 | 0.5255  | 0.3613                  | 0.7673 | 0.5071  | 0.3454                  | 0.7469 |
| Black                                                                                           | 0.6076  | 0.3797                  | 0.9797 | 0.6139  | 0.3831                  | 0.9911 | 0.7166  | 0.4453                  | 1.1607 | 0.8968  | 0.5543                  | 1.4566 |
| Chinese                                                                                         | 0.6796  | 0.3389                  | 1.3796 | 0.6817  | 0.3399                  | 1.3840 | 0.6796  | 0.3376                  | 1.3832 | 0.5738  | 0.2805                  | 1.1857 |
| Other                                                                                           | 0.8768  | 0.5001                  | 1.5421 | 0.8729  | 0.4976                  | 1.5361 | 0.8645  | 0.4934                  | 1.5187 | 0.8945  | 0.5040                  | 1.5911 |
| <b>Highest qualification</b>                                                                    |         |                         |        |         |                         |        |         |                         |        |         |                         |        |
| None                                                                                            | Ref     | –                       | –      | Ref     | –                       | –      | Ref     | –                       | –      | Ref     | –                       | –      |
| O levels/GCSEs/CSEs                                                                             | 1.1908  | 1.0069                  | 1.4077 | 1.2177  | 1.0275                  | 1.4425 | 1.0974  | 0.9246                  | 1.3019 | 1.0646  | 0.8946                  | 1.2666 |
| A levels/NVQ/HND/HNC <sup>2</sup>                                                               | 1.3584  | 1.1481                  | 1.6066 | 1.3899  | 1.1732                  | 1.6460 | 1.1957  | 1.0069                  | 1.4194 | 1.1558  | 0.9706                  | 1.3762 |
| Degree                                                                                          | 1.8206  | 1.5513                  | 2.1357 | 1.8744  | 1.5941                  | 2.2032 | 1.4749  | 1.2486                  | 1.7418 | 1.3026  | 1.0988                  | 1.5439 |

Note: Bonferroni-adjusted (~99.9%) confidence intervals. OR = odds ratio; CI = confidence interval; GCSEs = general certificate of secondary education; CSE = certificate of secondary education; NVQ = national vocational qualification; HND = higher national diploma; HNC = higher national certificate. For categorical explanatory variables the odds ratios indicate the changes in odds of reporting better self-rated health associated with the explanatory variable group relative to the reference group. Odds ratios for continuous explanatory variables indicate proportional odds ratios for a 1-unit increase in the explanatory variable on level of self-rated health. <sup>1</sup>Annual household income groups: very low (<£18,000), low (£18,000–£30,999), middle (£31,000–£51,999), high (£52,000–£100,000) and very high (>£100,000). <sup>2</sup>also includes 'other professional qualifications'. Model 1 – only individual explanatory variables; Model 2 – adjusted for age and sex; Model 3 – age, sex and all sociodemographic characteristics; Model 4 – all explanatory variables. \*All models adjusted for number of days between t0 and t2.

Psychosocial factors

| Table S57. Psychosocial factors at baseline associated with self-rated health at t2 |         |                         |        |         |                         |        |         |                         |        |         |                         |        |
|-------------------------------------------------------------------------------------|---------|-------------------------|--------|---------|-------------------------|--------|---------|-------------------------|--------|---------|-------------------------|--------|
| Term                                                                                | Model 1 |                         |        | Model 2 |                         |        | Model 3 |                         |        | Model 4 |                         |        |
|                                                                                     | OR      | Bonferroni-corrected CI |        | OR      | Bonferroni-corrected CI |        | OR      | Bonferroni-corrected CI |        | OR      | Bonferroni-corrected CI |        |
| <b>Loneliness</b>                                                                   |         |                         |        |         |                         |        |         |                         |        |         |                         |        |
| Not lonely                                                                          | Ref     | –                       | –      | Ref     | –                       | –      | Ref     | –                       | –      | Ref     | –                       | –      |
| Lonely                                                                              | 0.3934  | 0.3318                  | 0.4669 | 0.3950  | 0.3331                  | 0.4687 | 0.4144  | 0.3492                  | 0.4921 | 0.5103  | 0.4281                  | 0.6086 |
| <b>Social isolation</b>                                                             |         |                         |        |         |                         |        |         |                         |        |         |                         |        |
| Not isolated                                                                        | Ref     | –                       | –      | Ref     | –                       | –      | Ref     | –                       | –      | Ref     | –                       | –      |
| Isolated                                                                            | 0.6071  | 0.5271                  | 0.6995 | 0.6099  | 0.5295                  | 0.7027 | 0.6512  | 0.5650                  | 0.7508 | 0.8303  | 0.7172                  | 0.9615 |

*Note:* Bonferroni-adjusted (~99.9%) confidence intervals. OR = odds ratio; CI = confidence interval. For categorical explanatory variables the odds ratios indicate the changes in odds of reporting better self-rated health associated with the explanatory variable group relative to the reference group.

Model 1 – only individual explanatory variables.

Model 2 – adjusted for age and sex.

Model 3 – age, sex and all psychosocial factors.

Model 4 – all explanatory variables.

\*All models adjusted for number of days between t0 and t2.

Lifestyle factors

| Table S58. Lifestyle factors at baseline associated with self-rated health at t2 |         |                         |        |         |                         |        |         |                         |        |         |                         |        |
|----------------------------------------------------------------------------------|---------|-------------------------|--------|---------|-------------------------|--------|---------|-------------------------|--------|---------|-------------------------|--------|
| Term                                                                             | Model 1 |                         |        | Model 2 |                         |        | Model 3 |                         |        | Model 4 |                         |        |
|                                                                                  | OR      | Bonferroni-corrected CI |        | OR      | Bonferroni-corrected CI |        | OR      | Bonferroni-corrected CI |        | OR      | Bonferroni-corrected CI |        |
| <b>Sleep duration</b> (hours/day)                                                | 1.1006  | 1.0589                  | 1.1438 | 1.0969  | 1.0553                  | 1.1401 | 1.0767  | 1.0358                  | 1.1193 | 1.0756  | 1.0345                  | 1.1183 |
| <b>Physical activity</b> (days/week) <sup>1</sup>                                |         |                         |        |         |                         |        |         |                         |        |         |                         |        |
| Walking                                                                          | 1.0756  | 1.0561                  | 1.0953 | 1.0736  | 1.0542                  | 1.0934 | 1.0221  | 1.0021                  | 1.0425 | 1.0289  | 1.0087                  | 1.0495 |
| Moderate activity                                                                | 1.0788  | 1.0617                  | 1.0963 | 1.0777  | 1.0604                  | 1.0952 | 0.9927  | 0.9733                  | 1.0125 | 1.0029  | 0.9832                  | 1.0230 |
| Vigorous activity                                                                | 1.1661  | 1.1431                  | 1.1896 | 1.1723  | 1.1491                  | 1.1961 | 1.1383  | 1.1119                  | 1.1653 | 1.1278  | 1.1015                  | 1.1547 |
| <b>Stair climbing frequency</b>                                                  |         |                         |        |         |                         |        |         |                         |        |         |                         |        |
| None                                                                             | Ref     | –                       | –      | Ref     | –                       | –      |         |                         |        | Ref     | –                       | –      |
| 1-5/day                                                                          | 0.9418  | 0.7937                  | 1.1173 | 0.9570  | 0.8059                  | 1.1362 | 1.0167  | 0.8549                  | 1.2089 | 0.9539  | 0.8009                  | 1.1360 |
| 6-10/day                                                                         | 1.1940  | 1.0202                  | 1.3973 | 1.2108  | 1.0336                  | 1.4180 | 1.1587  | 0.9879                  | 1.3590 | 1.0481  | 0.8920                  | 1.2315 |
| 11-15/day                                                                        | 1.3456  | 1.1398                  | 1.5883 | 1.3606  | 1.1517                  | 1.6072 | 1.2022  | 1.0160                  | 1.4224 | 1.0756  | 0.9072                  | 1.2752 |
| 16-20/day                                                                        | 1.5273  | 1.2671                  | 1.8408 | 1.5393  | 1.2762                  | 1.8563 | 1.3133  | 1.0867                  | 1.5871 | 1.1764  | 0.9715                  | 1.4245 |
| 20+/day                                                                          | 1.5307  | 1.2540                  | 1.8683 | 1.5464  | 1.2657                  | 1.8891 | 1.2657  | 1.0334                  | 1.5501 | 1.1442  | 0.9325                  | 1.4038 |
| <b>Alcohol intake frequency</b>                                                  |         |                         |        |         |                         |        |         |                         |        |         |                         |        |
| Never                                                                            | 0.7111  | 0.5895                  | 0.8583 | 0.6996  | 0.5798                  | 0.8446 | 0.7176  | 0.5940                  | 0.8671 | 0.8048  | 0.6646                  | 0.9748 |
| Special occasions                                                                | 0.6698  | 0.5781                  | 0.7762 | 0.6456  | 0.5568                  | 0.7487 | 0.7173  | 0.6181                  | 0.8326 | 0.7999  | 0.6880                  | 0.9300 |
| 1-3/month                                                                        | 0.8298  | 0.7278                  | 0.9461 | 0.8148  | 0.7145                  | 0.9293 | 0.8548  | 0.7489                  | 0.9756 | 0.9051  | 0.7924                  | 1.0338 |
| 1-2/week                                                                         | Ref     | –                       | –      | Ref     | –                       | –      |         |                         |        | Ref     | –                       | –      |
| 3-4/week                                                                         | 1.1309  | 1.0254                  | 1.2472 | 1.1380  | 1.0318                  | 1.2552 | 1.0713  | 0.9702                  | 1.1831 | 1.0085  | 0.9126                  | 1.1145 |
| Daily/almost daily                                                               | 1.0750  | 0.9689                  | 1.1927 | 1.0902  | 0.9816                  | 1.2107 | 1.0647  | 0.9567                  | 1.1848 | 0.9799  | 0.8795                  | 1.0917 |
| <b>BMI</b> (kg/m <sup>2</sup> )                                                  | 0.8848  | 0.8771                  | 0.8926 | 0.8846  | 0.8769                  | 0.8924 | 0.8960  | 0.8879                  | 0.9041 | 0.8992  | 0.8911                  | 0.9074 |
| <b>Smoking status</b>                                                            |         |                         |        |         |                         |        |         |                         |        |         |                         |        |
| Never                                                                            | Ref     | –                       | –      | Ref     | –                       | –      |         |                         |        | Ref     | –                       | –      |
| Former                                                                           | 0.7758  | 0.7176                  | 0.8385 | 0.7744  | 0.7158                  | 0.8378 | 0.7985  | 0.7367                  | 0.8654 | 0.8330  | 0.7680                  | 0.9035 |
| Current                                                                          | 0.4923  | 0.4228                  | 0.5733 | 0.5010  | 0.4302                  | 0.5837 | 0.5104  | 0.4369                  | 0.5965 | 0.5724  | 0.4893                  | 0.6698 |

Note: Bonferroni-adjusted (~99.9%) confidence intervals. OR = odds ratio; CI = confidence interval; BMI = body mass index. For categorical explanatory variables the odds ratios indicate the changes in odds of reporting better self-rated health associated with the explanatory variable group relative to the reference group. Odds ratios for continuous explanatory variables indicate proportional odds ratios for a 1-unit increase in the explanatory variable on level of self-rated health. <sup>1</sup>number of days per week engaging in these activities for 10+ minutes continuously.

Model 1 – only individual explanatory variables; Model 2 – adjusted for age and sex; Model 3 – age, sex and all lifestyle factors; Model 4 – all explanatory variables. \*All models adjusted for number of days between t0 and t2.

Environmental exposures

| Table S59. Environmental exposures at baseline associated with self-rated health at t2 |         |                         |         |                         |        |                         |        |                         |         |                         |        |       |
|----------------------------------------------------------------------------------------|---------|-------------------------|---------|-------------------------|--------|-------------------------|--------|-------------------------|---------|-------------------------|--------|-------|
| Term                                                                                   | Model 1 |                         | Model 2 |                         |        | Model 3                 |        |                         | Model 4 |                         |        |       |
|                                                                                        | OR      | Bonferroni-corrected CI | OR      | Bonferroni-corrected CI | OR     | Bonferroni-corrected CI | OR     | Bonferroni-corrected CI | OR      | Bonferroni-corrected CI |        |       |
| <b>PM<sub>2.5</sub></b>                                                                | 0.9205  | 0.8889                  | 0.9531  | 0.9213                  | 0.8896 | 0.9540                  | 0.9251 | 0.8595                  | 0.9957  | 0.9855                  | 0.9140 | 1.063 |
| <b>PM<sub>10</sub></b>                                                                 | 0.9821  | 0.9631                  | 1.0014  | 0.9825                  | 0.9635 | 1.0018                  | 1.0105 | 0.9872                  | 1.0343  | 1.0174                  | 0.9936 | 1.042 |
| <b>NO<sub>2</sub></b>                                                                  | 0.9890  | 0.9840                  | 0.9940  | 0.9891                  | 0.9841 | 0.9942                  | 0.9955 | 0.9834                  | 1.0079  | 0.9998                  | 0.9872 | 1.013 |
| <b>L<sub>den</sub></b>                                                                 | 0.9920  | 0.9835                  | 1.0006  | 0.9921                  | 0.9836 | 1.0007                  | 0.9978 | 0.9881                  | 1.0076  | 0.9976                  | 0.9878 | 1.008 |
| <b>Greenspace 1000m</b>                                                                | 1.0021  | 1.0004                  | 1.0037  | 1.0021                  | 1.0004 | 1.0037                  | 0.9989 | 0.9963                  | 1.0016  | 1.0004                  | 0.9978 | 1.003 |

Note: Bonferroni-adjusted (~99.9%) confidence intervals. OR = odds ratio; CI = confidence interval; PM = particulate matter; NO<sub>2</sub> = nitrogen dioxide; L<sub>den</sub> = day-evening-night noise level. Odds ratios for continuous explanatory variables indicate proportional odds ratios for a 1-unit increase in the explanatory variable on level of self-rated health.

Model 1 – only individual explanatory variables.

Model 2 – adjusted for age and sex.

Model 3 – age, sex and all environmental exposures.

Model 4 – all explanatory variables.

\*All models adjusted for number of days between t0 and t2.

**Table S60. Descriptive statistics additional analyses**

Descriptive statistics

| Table S60. Descriptive statistics additional analyses |                                                     |
|-------------------------------------------------------|-----------------------------------------------------|
| Variable                                              | Statistics                                          |
| <b>Body fat percentage</b>                            | Mean (SD)<br>30.85 (8.46)<br>Range<br>5-65.2        |
| <b>Alcohol intake frequency</b>                       | <i>n</i> (%)                                        |
| Lifetime abstainers                                   | 10 599 (3.45)                                       |
| Current abstainers                                    | 9 792 (3.19)                                        |
| Special occasions                                     | 31 526 (10.26)                                      |
| 1-3/month                                             | 33 798 (11.00)                                      |
| 1-2/week                                              | 78 777 (25.63)                                      |
| 3-4/week                                              | 75 251 (24.48)                                      |
| Daily/almost daily                                    | 67 603 (22.00)                                      |
| <b>Current tobacco smoking</b>                        | <i>n</i> (%)                                        |
| “Yes, on most or all days”                            | 21 778 (7.09)                                       |
| “Only occasionally”                                   | 8 487 (2.76)                                        |
| “No”                                                  | 277 107 (90.15)                                     |
| <b>Metabolic Equivalent Task minutes/week</b>         | Median (IQR)                                        |
| Walking                                               | 693 (1089)                                          |
| Moderate activity                                     | 480 (1080)                                          |
| Vigorous activity                                     | 240 (960)                                           |
| <b>PM<sub>2.5</sub></b>                               | <i>n</i> (%)                                        |
| ≤10 µg/m <sup>3</sup>                                 | 167 631 (54.54)                                     |
| >10 µg/m <sup>3</sup>                                 | 139 747 (45.46)                                     |
| <b>PM<sub>10</sub></b>                                | <i>n</i> (%)                                        |
| ≤20 µg/m <sup>3</sup>                                 | 290 684 (94.57)                                     |
| >20 µg/m <sup>3</sup>                                 | 16 694 (5.43)                                       |
| <b>NO<sub>2</sub></b>                                 | <i>n</i> (%)                                        |
| ≤40 µg/m <sup>3</sup>                                 | 294 402 (95.78)                                     |
| >40 µg/m <sup>3</sup>                                 | 12 976 (4.22)                                       |
| <b>L<sub>den</sub></b>                                | <i>n</i> (%)                                        |
| ≤53 decibels                                          | 61 017 (19.85)                                      |
| >53 decibels                                          | 246 361 (80.15)                                     |
| <b>Greenspace 300m</b>                                | Mean (SD)<br>35.65 (23.46)<br>Range<br>0.227-99.180 |

Note: SD = standard deviation; IQR = interquartile range; PM = particulate matter; NO<sub>2</sub> = nitrogen dioxide; L<sub>den</sub> = day-evening-night noise level.

**Figure S25. Generalised additive models**

To identify potential non-linear associations between continuous explanatory variables and health status, we fitted binomial generalised additive models (presented below).

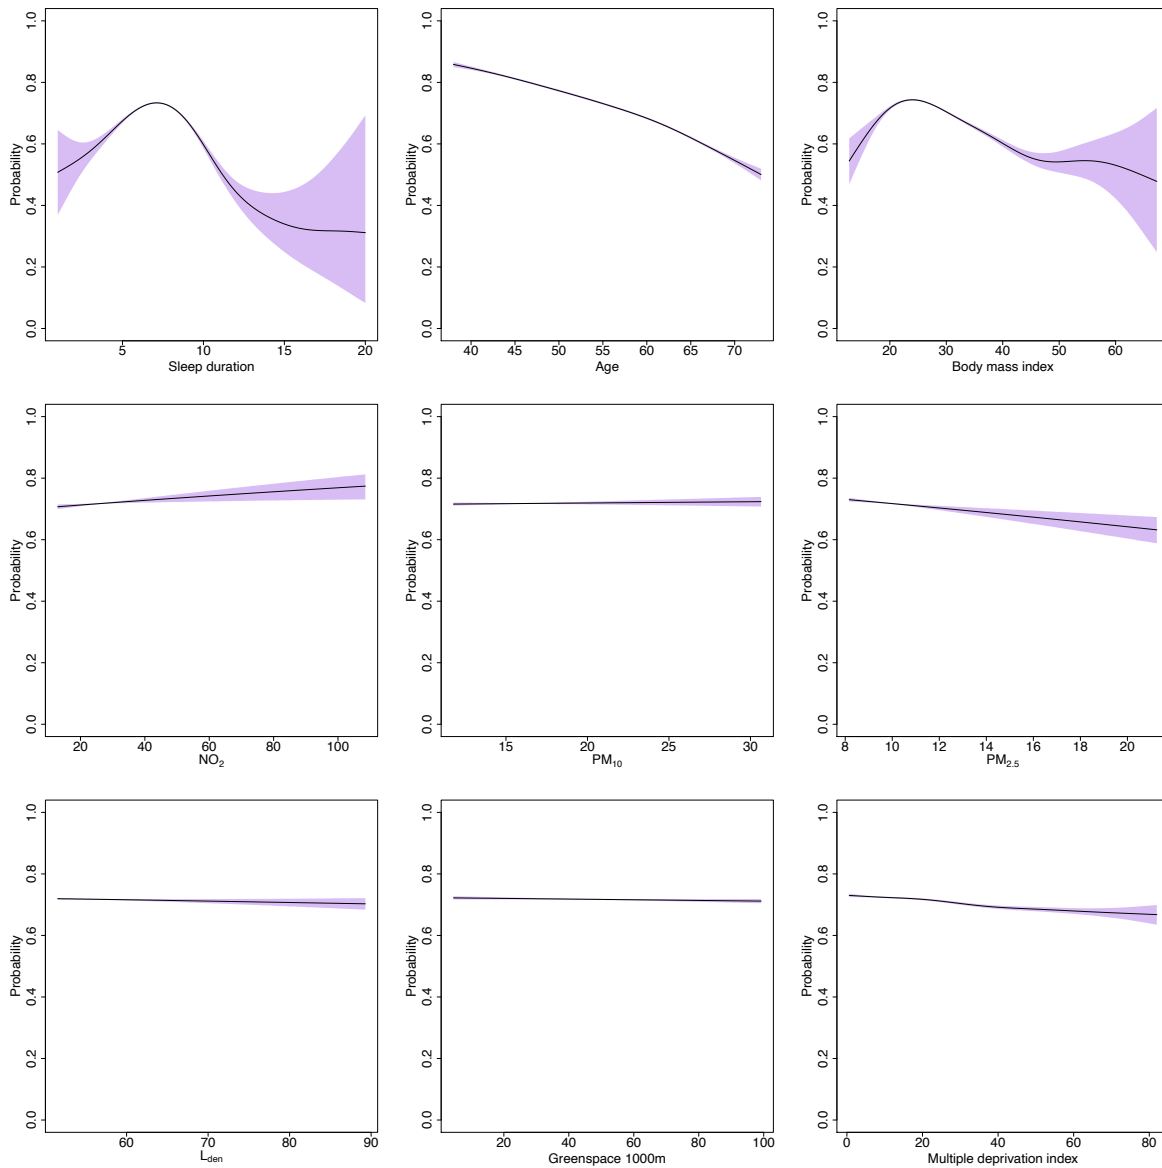

**Figure S25.** Probabilities of favourable health status (healthy:  $\geq 0.50$ ; unhealthy  $< 0.50$ ) by continuous explanatory variables. Results are from a binomial generalised additive model that included all explanatory variables of the full multivariable logistic regression model (Model 4). The shaded areas correspond to approximate 95% confidence intervals ( $\pm 2 \times$  standard error). L<sub>den</sub> = day-evening-night noise level; PM = particulate matter; NO<sub>2</sub> = nitrogen dioxide.
